# Supplementary material for: Loss of miR-514a-3p regulation of PEG3 activates the NF-kappa B pathway in human testicular germ cell tumors
Source: PubMed Central journal article supplement (PMC5520681; doi:10.1038/cddis.2016.464), 2017-05-04
Supplement: cddis2016464x1.pdf [file cddis2016464x1.pdf]

## **Supplementary Information**

### **Loss of miR-514a-3p regulation of PEG3 activates the NF-kappa B pathway in human testicular germ cell tumors**

DM Özata, X Li, L Lee, J Liu, D Warsito, P Hajeri, I Hultman, O Fotouhi, S Marklund, L Ährlund-Richter, CC Juhlin, C Larsson and W-O Lui

**a**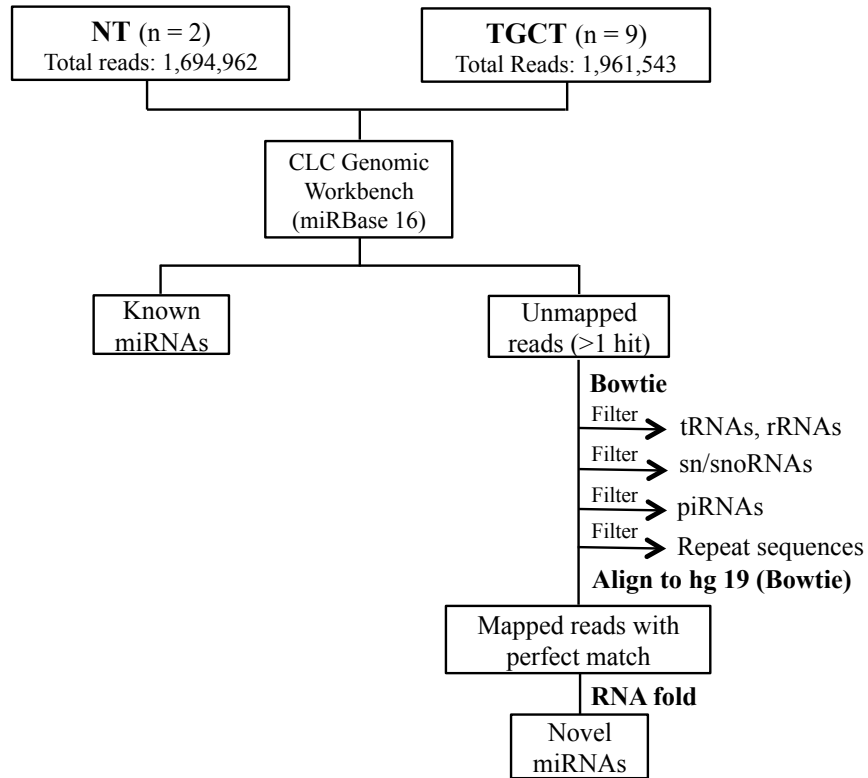**b**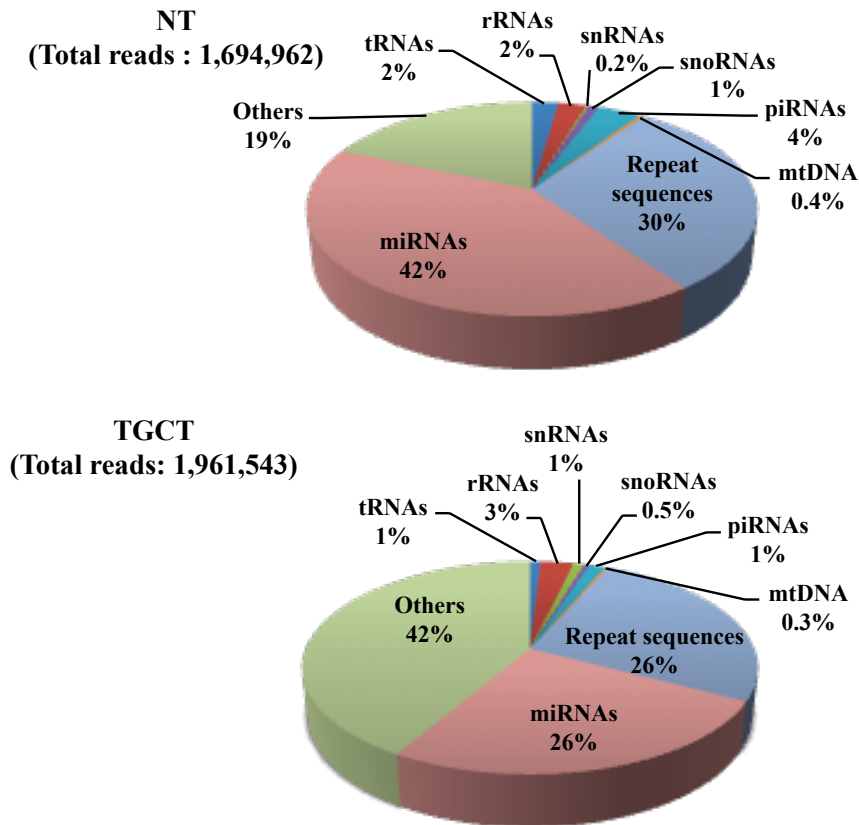

**Supplementary Figure 1.** sRNA sequencing data analysis and sRNA compositions in normal testes (NT) and testicular germ cell tumors (TGCTs). **(a)** Workflow of the sRNA-sequencing data analysis performed in the study. **(b)** Different sRNA compositions of cDNA libraries present in the NT and TGCTs.

**a**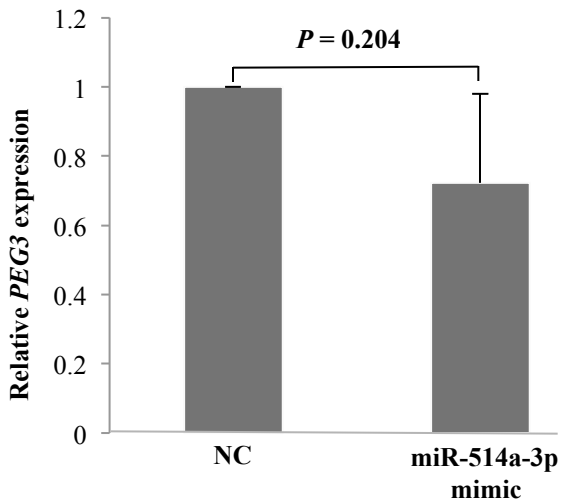**b**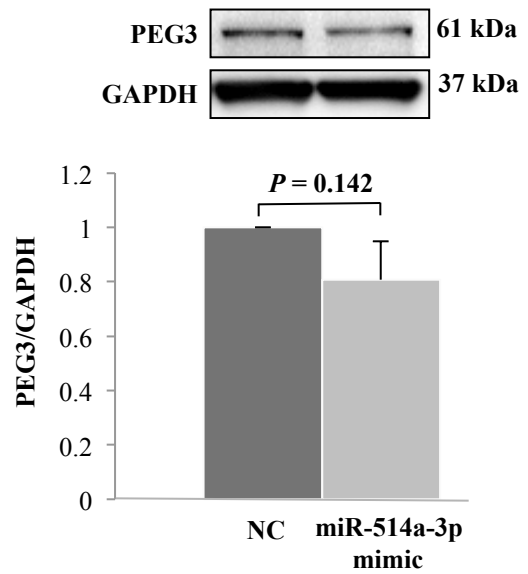**c**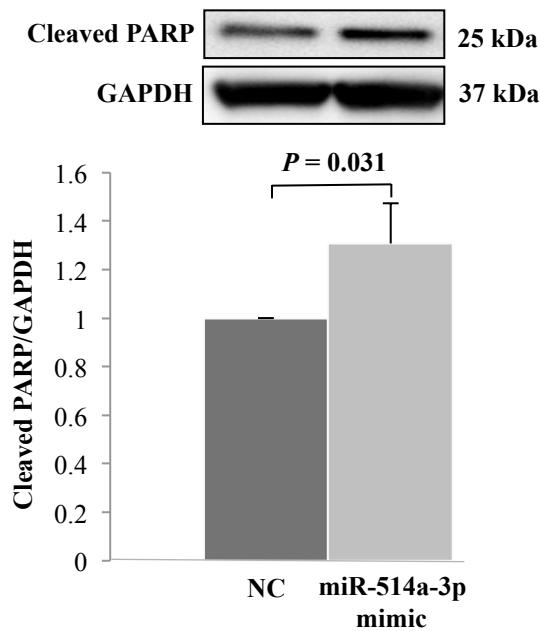**d**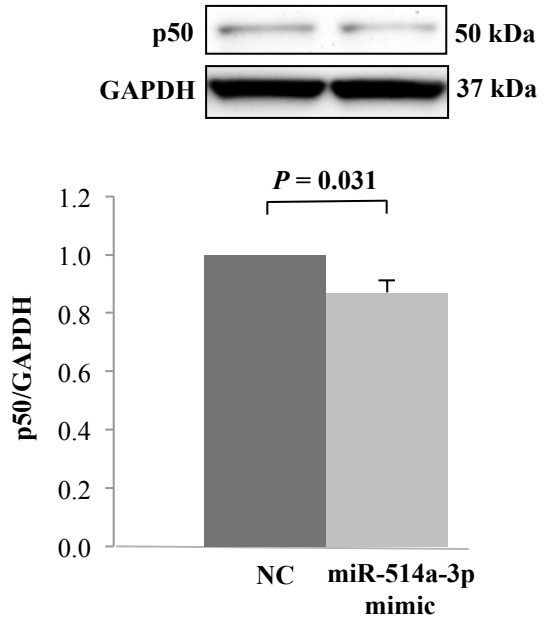**e**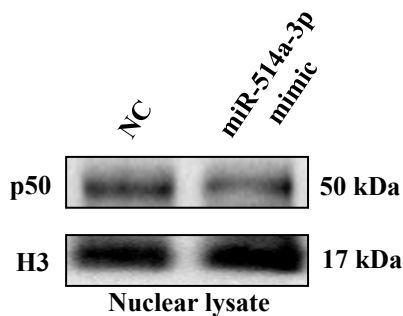

**Supplementary Figure 2.** Evaluation of the functional consequences of miR-514a-3p overexpression in 2102Ep cells. Cells were transfected with miR-514a-3p mimic or negative control (NC) for 48 hours and evaluated for: (a) PEG3 mRNA expression by RT-qPCR; (b) PEG3 protein by Western blot analysis; (c) cleaved PARP by Western blot analysis; and (d-e) Western blot analysis of p50 expression from total protein lysate (d) and nuclear lysate (e). GAPDH and H3 were used as loading controls.

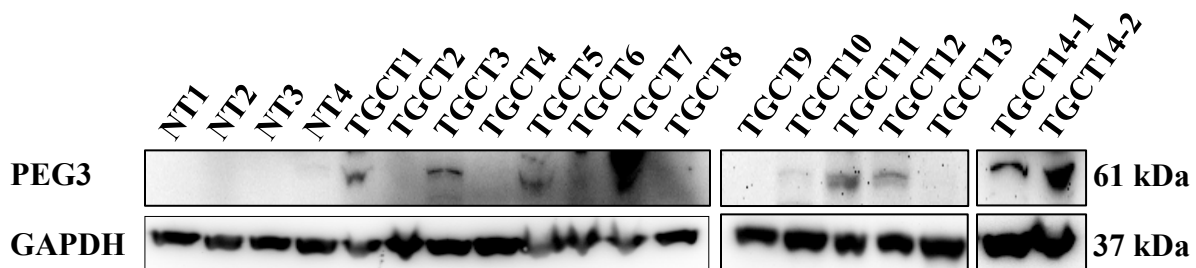

**Supplementary Figure 3.** Measurement of PEG3 protein expression in 4 NT and 15 TGCTs by Western blot analysis. GAPDH was used as a loading control.

**a**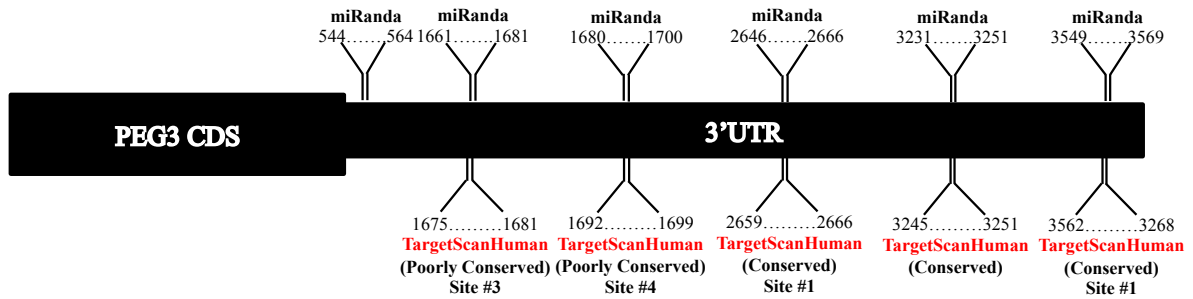**b**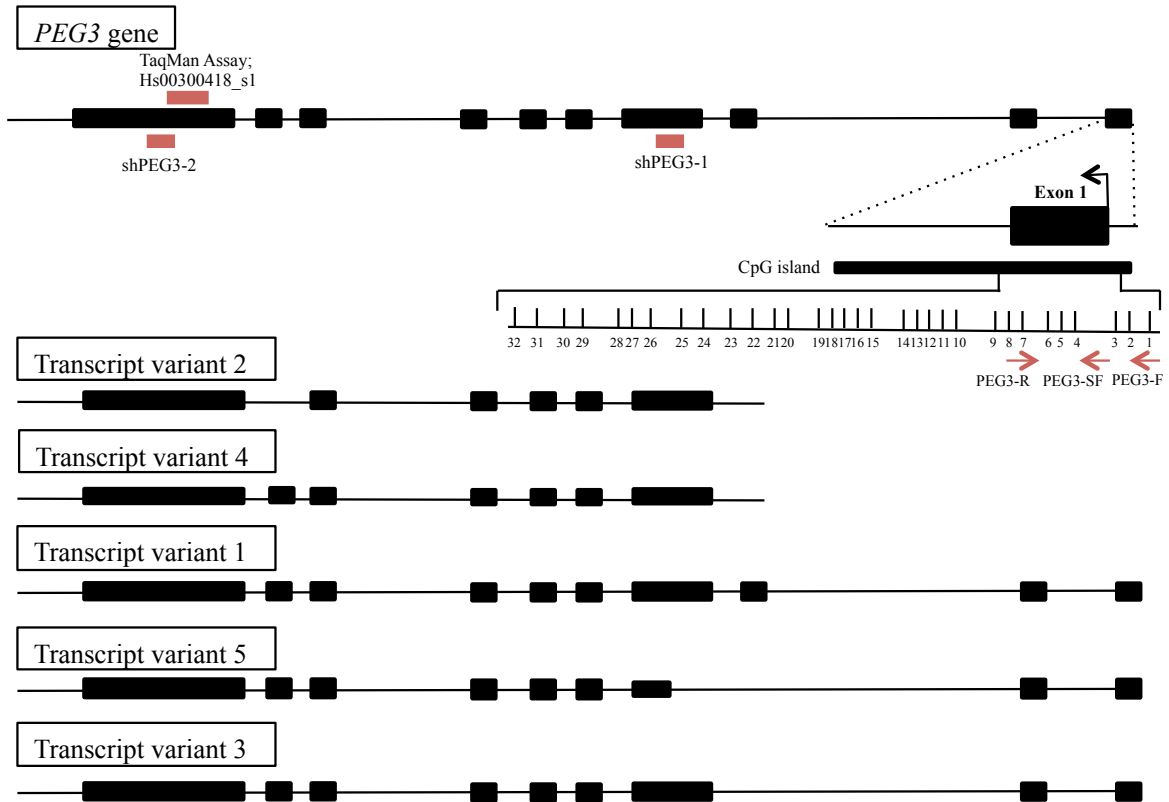**c**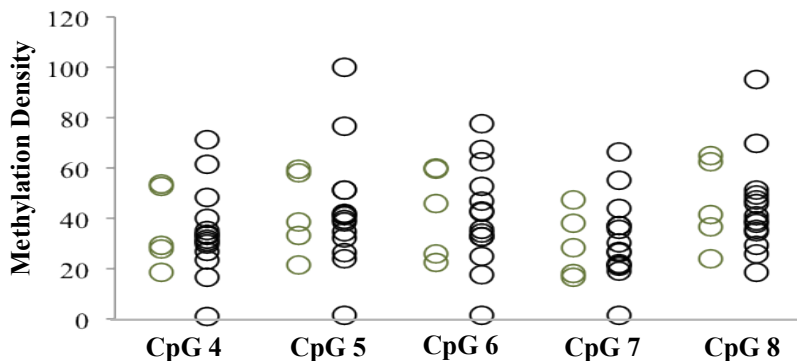

**Supplementary Figure 4.** *PEG3* gene structure, *miR-514a-3p* target sites, shRNA design and methylation analysis. **(a)** Predicted *miR-514a-3p* binding sites in the 3'UTR of *PEG3* by TargetScanHuman and miRanda. Sites #1-4 were included in the *PEG3* 3' UTR reporter assays. **(b)** An illustration of the *PEG3* gene and its transcript variants. The location of the target sequence by the shRNAs and TaqMan gene expression assay is indicated with red boxes, and the Pyrosequencing primers are marked with arrows. **(c)** methylation density (in %) at five CpG sites of the *PEG3* promoter in NT (green empty circles,  $n=5$ ) and TGCTs (black empty circles,  $n=12$ ) determined by Pyrosequencing.

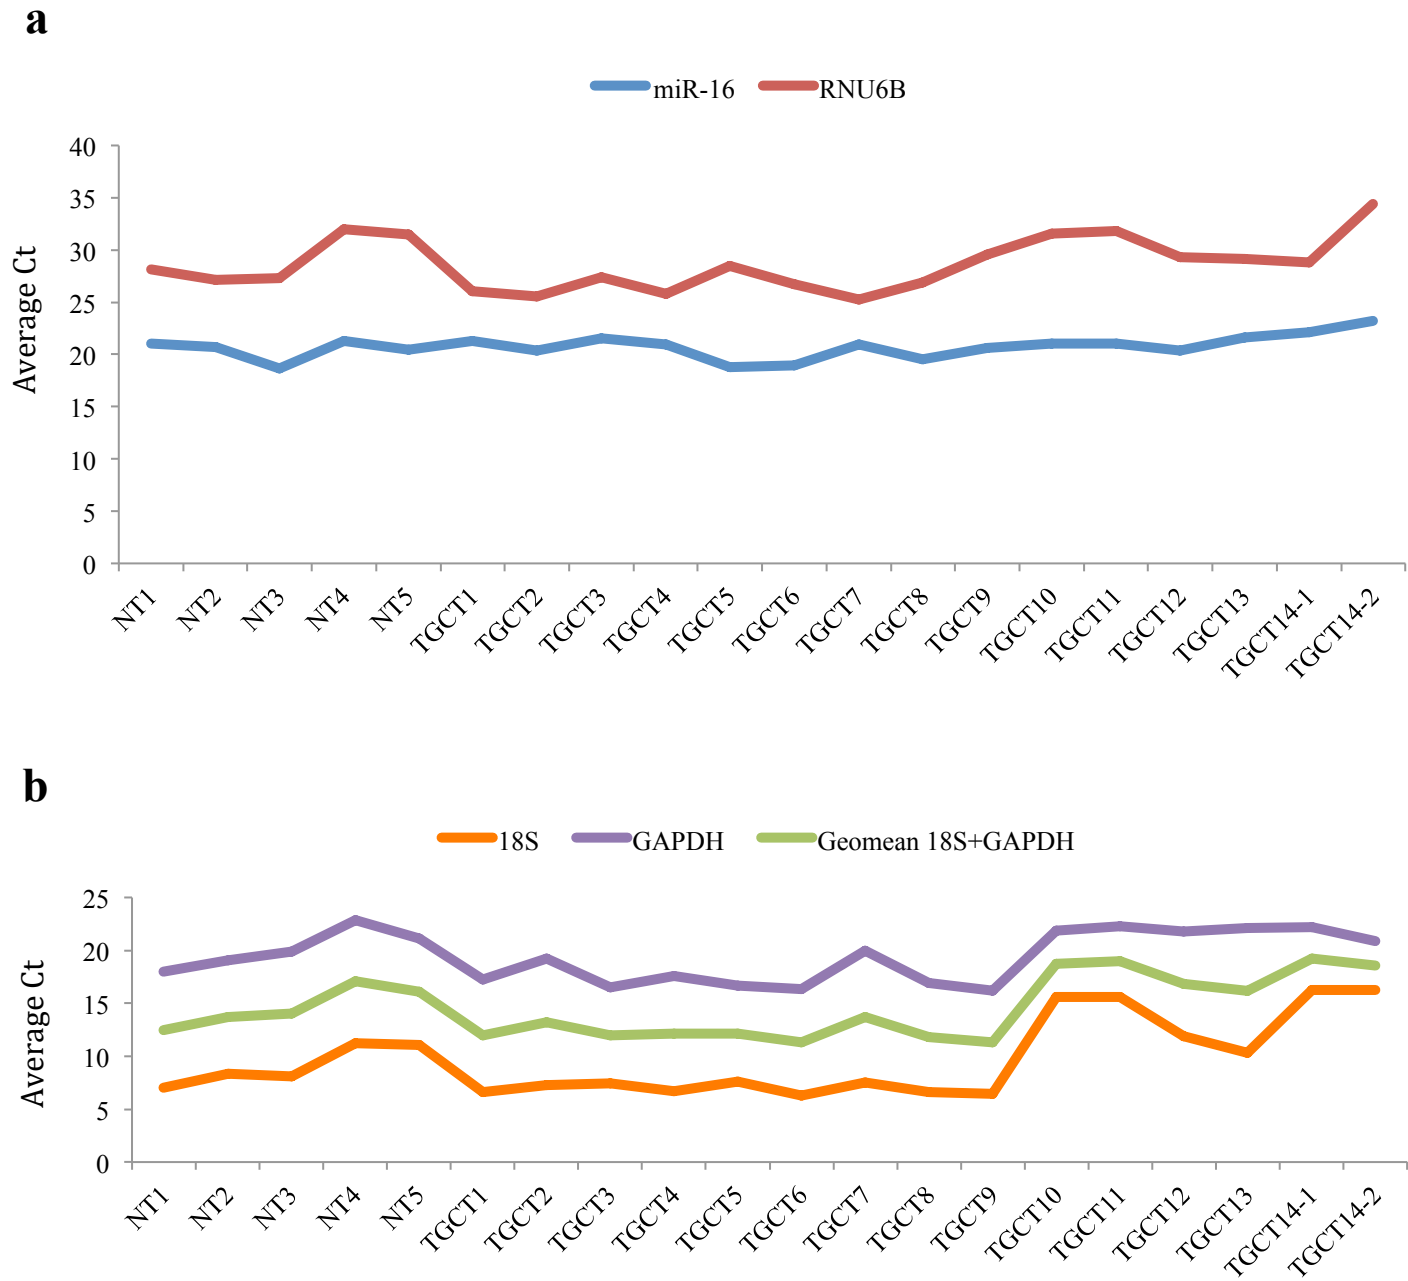

**Supplementary Figure 5.** RT-qPCR analysis of various endogenous controls in 5 NT and 15 TGCTs. (a) Comparison of miR-16 and *RNU6B* expression as endogenous control for miRNA quantification. (b) Comparison of *18S rRNA*, *GAPDH* and geomean of *18S rRNA* and *GAPDH* as endogenous control for mRNA quantification.

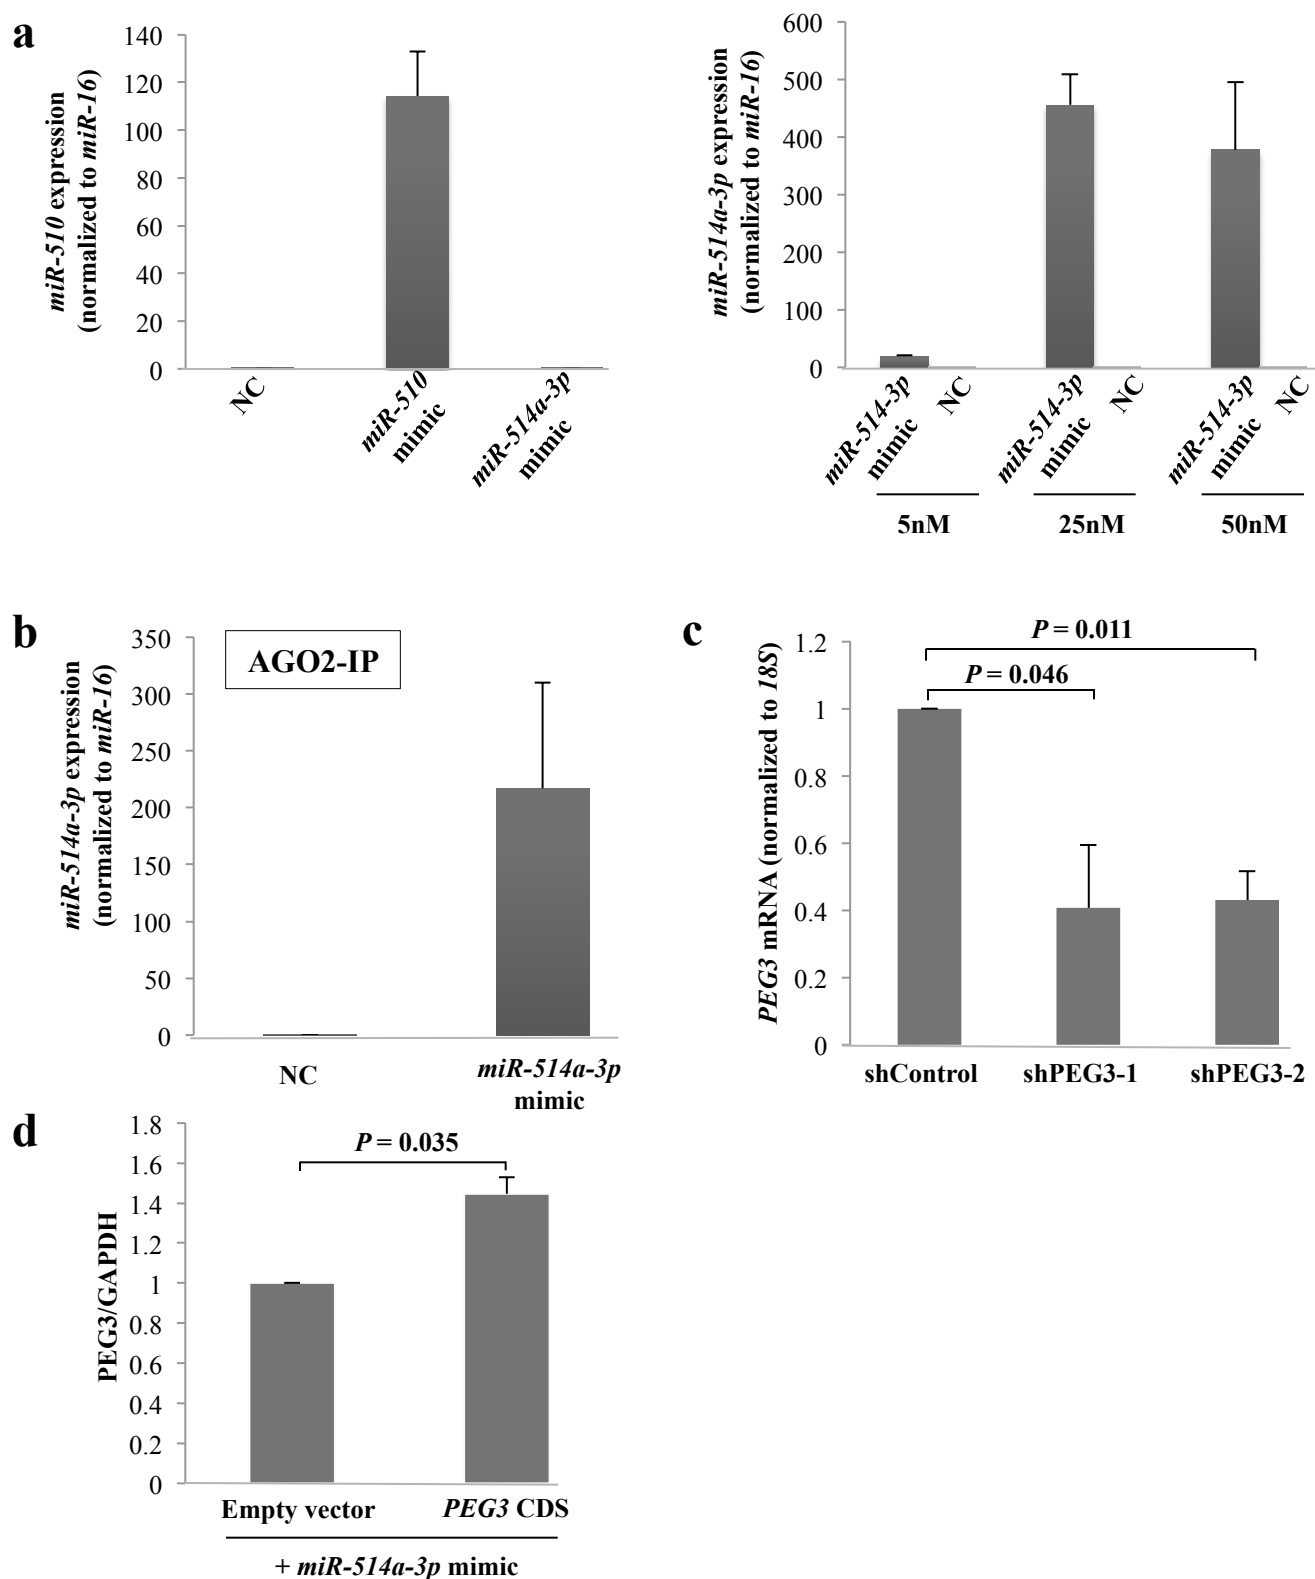

**Supplementary Figure 6.** Evaluation of miRNA, shRNA and PEG3 CDS transfection efficiencies. **(a)** Expressions of miR-510 and miR-514a-3p were quantified by RT-qPCR in cells transfected with miRNA mimic or NC for functional studies. **(b)** miR-514a-3p level was determined in cells transfected with miR-514a-3p mimic or NC for the AGO2 RNA co-immunoprecipitation experiment. **(c)** Evaluation of PEG3 silencing efficiency by RT-qPCR. **(d)** Assessment of PEG3 protein level in cells co-transfected with PEG3 CDS construct or vector control and miR-514a-3p mimic.

**Supplementary Table 1.** Novel candidate miRNAs identified from human TGCTs and NT

| Candidate miRNA | No. of reads | Size (nt) | Stem-loop structures of putative miRNA precursors (5'→3')                                                                                                                                      | dG    | Genomic location | Gene/intergenic | intron/exon/UTR |
|-----------------|--------------|-----------|------------------------------------------------------------------------------------------------------------------------------------------------------------------------------------------------|-------|------------------|-----------------|-----------------|
| Candidate_1_5p  | 2            | 22        | <pre>           A           UC UAGACCUCGGAACUCU UGGGGAUUUGAGU \ AAUCUGGGAGACUGGAGA ACACCCUAAUCGUCG           G           </pre>                                                                | -57.8 | 4p15.33          | intergenic      |                 |
| Candidate_2_5p  | 3            | 19        | <pre>           CA-- CC G G G GGGCA GCUGU CGGA AGGGGA GU UGAGGDCUC \ CGACG GACU UUCACU GA UGUCCAGAC U UCUG CU A G GGUAC           </pre>                                                       | -44   | 22q13.33         | PPP6R2          | intron          |
| Candidate_3_5p  | 3            | 24        | <pre> AAACUA GA-- - AG C -- C-- AU GGG GC UGGG GCAG UC GGA GCAG U CAC CG ACCC CGUC AG CCU CGUU C ----- GAAC U A- A UC UUC CC           </pre>                                                  | -26.3 | 4p15.2           | GPR125          | intron          |
| Candidate_4_5p  | 4            | 21        | <pre>           C           G AG UAUUUUGCCAAACCCGACC CUUAGGUG \ AUAAAACCGUUGAGACUG GGAUCCAAAC           U           CAGU G UA           </pre>                                                 | -49.8 | 15q26.3          | IGF1R           | intron          |
| Candidate_5_5p  | 5            | 22        | <pre>           C           CUU CUUUGUCUUAAGGCUUCCUCCUCCUCCUCCU GAGA CCAAGAGAAUCCGAGGGGAGGAGACCG C- C           </pre>                                                                         | -91.7 | 1q25.2           | FAM163A         | intron          |
| Candidate_6_5p  | 2            | 20        | <pre>           C           GUA GCUU AGUA UGGAGCACACAGGAAAGG A CGA UCAU ACCUCGUGGACUUCUCC C C CU AAUU           </pre>                                                                         | -51.4 | 9p21.1           | intergenic      |                 |
| Candidate_7_5p  | 4            | 21        | <pre>           A           C- G - UA CUUAGG UGGGG UCU UAGAGU UUC \ GGAUAC ACCCCC AAGG AUCCUA AG U ----- UC A C AG           </pre>                                                            | -35.3 | 1q21.1           | NBPF9           | intron          |
| Candidate_8_5p  | 4            | 22        | <pre>           A           CUUCU - ACUA AAGGCCACUUA GUAGUCUGAGGCCA GUA CAU \ UUCACAGAAAU CAUCAGACUCGGAU UAUU GUG U           C           AAUG           </pre>                                | -47.7 | 2q11.2           | intergenic      |                 |
| Candidate_9_5p  | 4            | 20        | <pre>           A- - - - UA GGUUA GGAG GAGCGG GAU UAGUC GGGUCU \ UUUAGU UCUC UUCGUCU CG UUCAGG UCCUGACA AG GG A GAA - - GUGG           </pre>                                                  | -35.8 | 5q35.2           | intergenic      |                 |
| Candidate_10_5p | 3            | 25        | <pre>           C           G CACGU - - GG - - U GCUC CUUCU CU GAGG ACUGU AGA UUGGGUG U UGUG GCAAGA GG CUCU UGCGU UCU GGAUCCU U UCUCU U U U U C C C UA           </pre>                        | -38.1 | 7q22.1           | BUD31           | intron          |
| Candidate_11_5p | 4            | 25        | <pre>           G           A C - AGA AA CU GCUGGC GGUAA GGA CCGGGG CUU GUU GC \ GG UGAUCC CCAU UCU GCUUUG GAA CCA CG A A U U UUGUGG A A A GG- UG           </pre>                             | -34.2 | Yq11.221         | UTY             | intron          |
| Candidate_12_5p | 3            | 21        | <pre>           G           C UG GUC GCCC CCGCC CAGCGU UC GGGC UGCC GAG A GC CCGG CCGC GCGG CCGCGC CG CCGG GCGG CUU U G - G- GCGG ACC C C AU G           </pre>                                | -61.9 | 14q32.33         | BC172394        | intron          |
| Candidate_13_5p | 2            | 25        | <pre>           C           ACCUUU G GAG AGU EUG UC ACA GAGGGU GAGAGG UUCUCU U UUC UCAU UAC AG UGU CUAAGC UCUUUU ACAGAC U C C C UUUUA U C - GU---- A           </pre>                          | -30.5 | 20q13.13         | SLC9A8          | intron          |
| Candidate_14_5p | 2            | 22        | <pre>           A           UUA AAUACAUCUCU UUAUUCACUACAAAGCUUAU \ UUAUGAAGGAA AAUAGAGUAAGUUUUCGAAAGU           C           CUCA           </pre>                                              | -46.9 | 8q21.13          | intergenic      |                 |
| Candidate_15_3p | 2            | 20        | <pre>           UC- UU U - U - - - CCA ACC- UU GG CC GC UCUU CC CCA GC UCUGCA CUUCG CGC CC C UC GG CG AGGA GG GGU CG AGACUU GAGAC GCG GG C A UCA - - C A - U AAGG AG- GACC CU           </pre> | -34.9 | 3q21.3           | intergenic      |                 |
| Candidate_16_3p | 3            | 22        | <pre>           CA           UAGAC CAGUUAU GAGUUCUUAUCAGGAGGAGGG \ GUCAAUAA CUUACGAAUAGCGCCACUCUCU           CA           UAGCC           </pre>                                               | -55.2 | 5q34             | TENM2           | intron          |
| Candidate_17_3p | 10           | 22        | <pre>           U           AAA A UUCUUU GAA GAAAGACAU AGCCUGUCUA UA U GAGAAU CUU CUAUCUCUA UGGACAGAU GU U           C           G           </pre>                                            | -45.4 | 17q24.2          | ABCA6           | intron          |
| Candidate_18_3p | 3            | 21        | <pre>           CC U C           CCGC C UGU AU CA ACUUCUCUAGUUCUCCUCCUCCU UGUAUA A ACA UA GU UGAACAGAGUACAAAGAGGGGAGU ACAUAU U UA C A           </pre>                                         | -61.3 | 15q21.1          | GALK2           | intron          |
| Candidate_19_3p | 2            | 24        | <pre> AGGAA--- U- C - - - AG --- A- A G GGGAC GGG AGG CUGG CCU GUUU GAGUCG GG AG A UCUCUG CUU UCC GACC GGG UCAG UUGUGG CC UC U CUUUAACA UU U A A GU AAC GA^ G U           </pre>               | -34.4 | 9q34.11          | intergenic      |                 |
| Candidate_20_3p | 2            | 25        | <pre>           UCAG GA- CU - - - - - G U U A- U UCCU GCU GCUCUG CC GCCU CUGG GCCU GUAA GG A AGGA UGA UGGGAC GG UGGA GAGC CGGA CAUU UC U CAG-- GAG AU CU UAUUCU - C - GC A           </pre>    | -32.7 | 3p25.3           | TATDN2          | intron          |
| Candidate_21_3p | 2            | 26        | <pre>           CUC A AC----- G - U ---- GA GA CCA CCGGUC CC GCGCGU C UGGG GC UGGG UGU \ GGU GGCCAG GG CCGGUA G ACUU CG ACCC ACA C CUC A AGAATA G G U GAGAC AA AG           </pre>             | -40.6 | 16q24.1          | intergenic      |                 |
| Candidate_22_3p | 3            | 22        | <pre>           A           ACAAAU CAGU UCGGGCCAGUCAGUACUCCCC \ GUCU AAUUGGGUAGGCUUUGAGGGG           GA           GAUCAU           </pre>                                                      | -54   | Xq28             | ZNF275          | intron          |
| Candidate_23_3p | 2            | 19        | <pre>           AU           AU-- G UAUCUUAU CUAACAGCAGAAAAAU UCAACCC GAGU C AUGAGAANTA GAUUGCCUUUUUC AUGUUGG UUCA U           CC           CUUU U           </pre>                            | -47.3 | 5q23.1           | COMMD10         | intron          |
| Candidate_24_3p | 2            | 23        | <pre>           CCA           A GCUCU AGGUCACGCUUAGGGGUAUCCAUAUUGGG A UCGAA UUCACGUGGAGAUCCUUAAGGUUAMCC U GUCU           </pre>                                                                | -68.3 | 1p32.3           | TCEANC2         | intron          |
| Candidate_25_3p | 2            | 20        | <pre>           U           U- U UCCC-- UGCCUUUAUUUGGGAGUACACUCCUCAAUA ACAGU AAC G ACGGAAAUAAACCCUADGGGAGAGUUUA UDUCA UUG A CUCCAU U U           </pre>                                        | 69.4  | 6q25.1           | intergenic      |                 |
| Candidate_26_3p | 3            | 21        | <pre>           AU - GC- - C-- - - - GCUUUC UC A GCUCU CU UUCUGG GCU CCGC CU UCUGGG CAC UC G UWAGG GG AAGACUU UGG GGAGG GG GGACC GGG AC A -- A AUU G ACT A UUA ----- GA U           </pre>     | -35.9 | 21q22.11         | intergenic      |                 |
| Candidate_27_3p | 4            | 22        | <pre>           U-- A           AU UAUC UCUUUCACAGAAUUCUCCAGUAUAUAGUA UGUUA A AUU AGAABAAGUUAUAGAGGUAUUAUUAUUAUUAU U AUU A AA           </pre>                                                 | -51.2 | 1p31.3           | INADL           | intron          |
| Candidate_28_3p | 5            | 22        | <pre>           GA           CUU UCUCUGUAUUCUCCUACAGCAGCAUA UGAGC UGU C CGACACUGACGGGACUUGUCUUU AACGUC GAUA C A- C AAC           </pre>                                                        | -69.4 | 2q12.1           | IL18RAP         | intron          |
| Candidate_29_3p | 3            | 22        | <pre>           A           A GA GGUACUUUUUAGGGGUCCAA GAGCAGUU U CU UACAGAAAAAUACACAGUUU GUCGCAU A A C AAU           </pre>                                                                    | -48.8 | 1p21.3           | intergenic      |                 |

dG = free energies of predicted secondary structures; UTR = Untranslated region



**Supplementary Table 2.** Statistical analysis of miRNA variations between TGCTs and NT

| miRNA                                                                     | Observation (no. of reads) |        |         |        | Expectation (no. of reads) |        |         |        | P-value # |
|---------------------------------------------------------------------------|----------------------------|--------|---------|--------|----------------------------|--------|---------|--------|-----------|
|                                                                           | NT                         |        | TGCTs   |        | NT                         |        | TGCT    |        |           |
|                                                                           | Present                    | Absent | Present | Absent | Present                    | Absent | Present | Absent |           |
| <b>Total reads</b>                                                        | 702465                     |        | 501743  |        |                            |        |         |        |           |
| <b>Differentially expressed miRNAs between TGCTs and NT (P&lt;0.0001)</b> |                            |        |         |        |                            |        |         |        |           |
| let-7a                                                                    | 68831                      | 633634 | 32629   | 469114 | 59186                      | 643279 | 42274   | 459469 | < 0.0001  |
| let-7b                                                                    | 120293                     | 582172 | 20486   | 481257 | 82122                      | 620343 | 58657   | 443086 | < 0.0001  |
| let-7c                                                                    | 56852                      | 645613 | 11006   | 490737 | 39584                      | 662881 | 28274   | 473469 | < 0.0001  |
| miR-127-3p                                                                | 9454                       | 693011 | 1843    | 499900 | 6590                       | 695875 | 4707    | 497036 | < 0.0001  |
| miR-1323                                                                  | 141                        | 702324 | 1742    | 500001 | 1098                       | 701367 | 785     | 500958 | < 0.0001  |
| miR-142-3p                                                                | 1014                       | 701451 | 7070    | 494673 | 4716                       | 697749 | 3368    | 498375 | < 0.0001  |
| miR-142-5p                                                                | 485                        | 701980 | 2065    | 499678 | 1488                       | 700977 | 1062    | 500681 | < 0.0001  |
| miR-143                                                                   | 15020                      | 687445 | 47799   | 453944 | 36645                      | 665820 | 26174   | 475569 | < 0.0001  |
| miR-145                                                                   | 2839                       | 699626 | 12428   | 489315 | 8906                       | 693559 | 6361    | 495382 | < 0.0001  |
| miR-150                                                                   | 267                        | 702198 | 2686    | 499057 | 1723                       | 700742 | 1230    | 500513 | < 0.0001  |
| miR-202                                                                   | 13081                      | 689384 | 124     | 501619 | 7703                       | 694762 | 5502    | 496241 | < 0.0001  |
| miR-202*                                                                  | 31326                      | 671139 | 3004    | 498739 | 20026                      | 682439 | 14304   | 487439 | < 0.0001  |
| miR-21                                                                    | 17129                      | 685336 | 68920   | 432823 | 50196                      | 652269 | 35853   | 465890 | < 0.0001  |
| miR-223                                                                   | 281                        | 702184 | 1855    | 499888 | 1246                       | 701219 | 890     | 500853 | < 0.0001  |
| miR-23a                                                                   | 7866                       | 694599 | 11600   | 490143 | 11355                      | 691110 | 8111    | 493632 | < 0.0001  |
| miR-27a                                                                   | 881                        | 701584 | 2522    | 499221 | 1985                       | 700480 | 1418    | 500325 | < 0.0001  |
| miR-27b                                                                   | 1558                       | 700907 | 3346    | 498397 | 2861                       | 699604 | 2043    | 499700 | < 0.0001  |
| miR-302a                                                                  | 455                        | 702010 | 1942    | 499801 | 1398                       | 701067 | 999     | 500744 | < 0.0001  |
| miR-302b                                                                  | 303                        | 702162 | 2755    | 498988 | 1784                       | 700681 | 1274    | 500469 | < 0.0001  |
| miR-320a                                                                  | 17242                      | 685223 | 2009    | 499734 | 11230                      | 691235 | 8021    | 493722 | < 0.0001  |
| miR-335                                                                   | 6939                       | 695526 | 24037   | 477706 | 18070                      | 684395 | 12906   | 488837 | < 0.0001  |
| miR-374a                                                                  | 452                        | 702013 | 2087    | 499656 | 1481                       | 700984 | 1058    | 500685 | < 0.0001  |

|             |       |        |      |        |       |        |      |        |          |
|-------------|-------|--------|------|--------|-------|--------|------|--------|----------|
| miR-424     | 10466 | 691999 | 1232 | 500511 | 6824  | 695641 | 4874 | 496869 | < 0.0001 |
| miR-451     | 587   | 701878 | 3009 | 498734 | 2098  | 700367 | 1498 | 500245 | < 0.0001 |
| miR-507     | 2470  | 699995 | 19   | 501724 | 1452  | 701013 | 1037 | 500706 | < 0.0001 |
| miR-508-3p  | 3188  | 699277 | 14   | 501729 | 1868  | 700597 | 1334 | 500409 | < 0.0001 |
| miR-510     | 12839 | 689626 | 128  | 501615 | 7564  | 694901 | 5403 | 496340 | < 0.0001 |
| miR-513b    | 22959 | 679506 | 64   | 501679 | 13430 | 689035 | 9593 | 492150 | < 0.0001 |
| miR-513c    | 3465  | 699000 | 32   | 501711 | 2040  | 700425 | 1457 | 500286 | < 0.0001 |
| miR-514     | 5104  | 697361 | 34   | 501709 | 2997  | 699468 | 2141 | 499602 | < 0.0001 |
| miR-514b-5p | 5695  | 696770 | 65   | 501678 | 3360  | 699105 | 2400 | 499343 | < 0.0001 |
| miR-7       | 1129  | 701336 | 2860 | 498883 | 2327  | 700138 | 1662 | 500081 | < 0.0001 |
| miR-15b     | 4180  | 698285 | 6176 | 495567 | 6041  | 696424 | 4315 | 497428 | < 0.0001 |
| miR-182     | 689   | 701776 | 2010 | 499733 | 1574  | 700891 | 1125 | 500618 | < 0.0001 |
| miR-515-5p  | 69    | 702396 | 944  | 500799 | 591   | 701874 | 422  | 501321 | < 0.0001 |
| miR-144     | 92    | 702373 | 978  | 500765 | 624   | 701841 | 446  | 501297 | < 0.0001 |
| miR-373     | 606   | 701859 | 1782 | 499961 | 1393  | 701072 | 995  | 500748 | < 0.0001 |
| miR-15a     | 674   | 701791 | 1862 | 499881 | 1479  | 700986 | 1057 | 500686 | < 0.0001 |
| miR-367     | 102   | 702363 | 941  | 500802 | 608   | 701857 | 435  | 501308 | < 0.0001 |
| miR-509-3p  | 1392  | 701073 | 11   | 501732 | 818   | 701647 | 585  | 501158 | < 0.0001 |
| miR-19b     | 808   | 701657 | 1916 | 499827 | 1589  | 700876 | 1135 | 500608 | < 0.0001 |
| miR-424*    | 1890  | 700575 | 203  | 501540 | 1221  | 701244 | 872  | 500871 | < 0.0001 |
| miR-517a    | 76    | 702389 | 794  | 500949 | 508   | 701957 | 362  | 501381 | < 0.0001 |
| miR-423-5p  | 2396  | 700069 | 404  | 501339 | 1633  | 700832 | 1167 | 500576 | < 0.0001 |
| miR-1283    | 85    | 702380 | 764  | 500979 | 495   | 701970 | 354  | 501389 | < 0.0001 |
| miR-23b     | 3391  | 699074 | 4569 | 497174 | 4643  | 697822 | 3317 | 498426 | < 0.0001 |
| miR-136     | 2654  | 699811 | 547  | 501196 | 1867  | 700598 | 1334 | 500409 | < 0.0001 |
| miR-1       | 193   | 702272 | 938  | 500805 | 660   | 701805 | 471  | 501272 | < 0.0001 |
| miR-508-5p  | 1051  | 701414 | 10   | 501733 | 619   | 701846 | 442  | 501301 | < 0.0001 |
| miR-484     | 198   | 702267 | 890  | 500853 | 635   | 701830 | 453  | 501290 | < 0.0001 |
| miR-524-5p  | 43    | 702422 | 590  | 501153 | 369   | 702096 | 264  | 501479 | < 0.0001 |
| miR-503     | 1161  | 701304 | 63   | 501680 | 714   | 701751 | 510  | 501233 | < 0.0001 |

|             |       |        |       |        |       |        |       |        |          |
|-------------|-------|--------|-------|--------|-------|--------|-------|--------|----------|
| miR-26a     | 24474 | 677991 | 22114 | 479629 | 27177 | 675288 | 19411 | 482332 | < 0.0001 |
| miR-518b    | 88    | 702377 | 655   | 501088 | 433   | 702032 | 310   | 501433 | < 0.0001 |
| miR-302d    | 374   | 702091 | 1091  | 500652 | 855   | 701610 | 610   | 501133 | < 0.0001 |
| miR-486-5p  | 256   | 702209 | 896   | 500847 | 672   | 701793 | 480   | 501263 | < 0.0001 |
| miR-519a    | 30    | 702435 | 509   | 501234 | 314   | 702151 | 225   | 501518 | < 0.0001 |
| miR-16      | 1309  | 701156 | 2171  | 499572 | 2030  | 700435 | 1450  | 500293 | < 0.0001 |
| miR-517c    | 19    | 702446 | 476   | 501267 | 289   | 702176 | 206   | 501537 | < 0.0001 |
| miR-526b    | 25    | 702440 | 485   | 501258 | 298   | 702167 | 212   | 501531 | < 0.0001 |
| miR-302a*   | 410   | 702055 | 1082  | 500661 | 870   | 701595 | 622   | 501121 | < 0.0001 |
| miR-125b    | 17132 | 685333 | 15857 | 485886 | 19244 | 683221 | 13745 | 487998 | < 0.0001 |
| miR-92a     | 1235  | 701230 | 2032  | 499711 | 1906  | 700559 | 1361  | 500382 | < 0.0001 |
| miR-520a-5p | 27    | 702438 | 455   | 501288 | 281   | 702184 | 201   | 501542 | < 0.0001 |
| miR-302b*   | 645   | 701820 | 1333  | 500410 | 1154  | 701311 | 824   | 500919 | < 0.0001 |
| miR-193a-3p | 123   | 702342 | 606   | 501137 | 425   | 702040 | 304   | 501439 | < 0.0001 |
| miR-107     | 878   | 701587 | 1568  | 500175 | 1427  | 701038 | 1019  | 500724 | < 0.0001 |
| miR-519c-3p | 23    | 702442 | 396   | 501347 | 244   | 702221 | 175   | 501568 | < 0.0001 |
| miR-200c    | 173   | 702292 | 653   | 501090 | 482   | 701983 | 344   | 501399 | < 0.0001 |
| miR-96      | 154   | 702311 | 617   | 501126 | 450   | 702015 | 321   | 501422 | < 0.0001 |
| miR-512-3p  | 32    | 702433 | 402   | 501341 | 253   | 702212 | 181   | 501562 | < 0.0001 |
| miR-134     | 756   | 701709 | 31    | 501712 | 459   | 702006 | 328   | 501415 | < 0.0001 |
| miR-25      | 1120  | 701345 | 1739  | 500004 | 1668  | 700797 | 1191  | 500552 | < 0.0001 |
| miR-205     | 10    | 702455 | 326   | 501417 | 196   | 702269 | 140   | 501603 | < 0.0001 |
| miR-542-5p  | 748   | 701717 | 50    | 501693 | 466   | 701999 | 332   | 501411 | < 0.0001 |
| miR-19a     | 203   | 702262 | 636   | 501107 | 489   | 701976 | 350   | 501393 | < 0.0001 |
| miR-519b-3p | 27    | 702438 | 346   | 501397 | 218   | 702247 | 155   | 501588 | < 0.0001 |
| miR-99a     | 3067  | 699398 | 1110  | 500633 | 2437  | 700028 | 1740  | 500003 | < 0.0001 |
| miR-155     | 474   | 701991 | 951   | 500792 | 831   | 701634 | 594   | 501149 | < 0.0001 |
| miR-520c-3p | 23    | 702442 | 312   | 501431 | 195   | 702270 | 140   | 501603 | < 0.0001 |
| miR-218     | 112   | 702353 | 469   | 501274 | 339   | 702126 | 242   | 501501 | < 0.0001 |
| miR-25*     | 839   | 701626 | 114   | 501629 | 556   | 701909 | 397   | 501346 | < 0.0001 |

|             |       |        |      |        |       |        |      |        |          |
|-------------|-------|--------|------|--------|-------|--------|------|--------|----------|
| miR-498     | 42    | 702423 | 325  | 501418 | 214   | 702251 | 153  | 501590 | < 0.0001 |
| miR-30b     | 1297  | 701168 | 1779 | 499964 | 1794  | 700671 | 1282 | 500461 | < 0.0001 |
| miR-141     | 10    | 702455 | 258  | 501485 | 156   | 702309 | 112  | 501631 | < 0.0001 |
| miR-494     | 701   | 701764 | 77   | 501666 | 454   | 702011 | 324  | 501419 | < 0.0001 |
| miR-302c    | 22    | 702443 | 275  | 501468 | 173   | 702292 | 124  | 501619 | < 0.0001 |
| miR-516a-5p | 21    | 702444 | 269  | 501474 | 169   | 702296 | 121  | 501622 | < 0.0001 |
| miR-26b     | 5000  | 697465 | 5047 | 496696 | 5861  | 696604 | 4186 | 497557 | < 0.0001 |
| miR-365     | 434   | 702031 | 832  | 500911 | 739   | 701726 | 527  | 501216 | < 0.0001 |
| miR-30e     | 584   | 701881 | 993  | 500750 | 920   | 701545 | 657  | 501086 | < 0.0001 |
| miR-183     | 60    | 702405 | 326  | 501417 | 225   | 702240 | 161  | 501582 | < 0.0001 |
| miR-574-5p  | 1371  | 701094 | 386  | 501357 | 1025  | 701440 | 732  | 501011 | < 0.0001 |
| miR-374b    | 505   | 701960 | 885  | 500858 | 811   | 701654 | 579  | 501164 | < 0.0001 |
| miR-9*      | 19    | 702446 | 237  | 501506 | 149   | 702316 | 107  | 501636 | < 0.0001 |
| miR-146a    | 360   | 702105 | 712  | 501031 | 625   | 701840 | 447  | 501296 | < 0.0001 |
| miR-214     | 2060  | 700405 | 741  | 501002 | 1634  | 700831 | 1167 | 500576 | < 0.0001 |
| miR-335*    | 17    | 702448 | 224  | 501519 | 141   | 702324 | 100  | 501643 | < 0.0001 |
| miR-92a-1*  | 959   | 701506 | 220  | 501523 | 688   | 701777 | 491  | 501252 | < 0.0001 |
| miR-342-3p  | 182   | 702283 | 476  | 501267 | 384   | 702081 | 274  | 501469 | < 0.0001 |
| miR-506     | 381   | 702084 | 7    | 501736 | 226   | 702239 | 162  | 501581 | < 0.0001 |
| miR-376c    | 4493  | 697972 | 2119 | 499624 | 3857  | 698608 | 2755 | 498988 | < 0.0001 |
| miR-518e    | 15    | 702450 | 212  | 501531 | 132   | 702333 | 95   | 501648 | < 0.0001 |
| miR-520d-3p | 20    | 702445 | 220  | 501523 | 140   | 702325 | 100  | 501643 | < 0.0001 |
| miR-30c     | 1333  | 701132 | 1671 | 500072 | 1752  | 700713 | 1252 | 500491 | < 0.0001 |
| miR-361-3p  | 46    | 702419 | 259  | 501484 | 178   | 702287 | 127  | 501616 | < 0.0001 |
| miR-10b*    | 427   | 702038 | 29   | 501714 | 266   | 702199 | 190  | 501553 | < 0.0001 |
| miR-28-5p   | 236   | 702229 | 521  | 501222 | 442   | 702023 | 315  | 501428 | < 0.0001 |
| miR-518a-3p | 12    | 702453 | 190  | 501553 | 118   | 702347 | 84   | 501659 | < 0.0001 |
| hsa-let-7e  | 11516 | 690949 | 6529 | 495214 | 10526 | 691939 | 7519 | 494224 | < 0.0001 |
| miR-432     | 1324  | 701141 | 423  | 501320 | 1019  | 701446 | 728  | 501015 | < 0.0001 |
| hsa-let-7g  | 5204  | 697261 | 4937 | 496806 | 5916  | 696549 | 4225 | 497518 | < 0.0001 |

|              |      |        |      |        |      |        |      |        |          |
|--------------|------|--------|------|--------|------|--------|------|--------|----------|
| miR-22       | 966  | 701499 | 1257 | 500486 | 1297 | 701168 | 926  | 500817 | < 0.0001 |
| miR-106b     | 125  | 702340 | 350  | 501393 | 277  | 702188 | 198  | 501545 | < 0.0001 |
| miR-151-5p   | 6511 | 695954 | 5976 | 495767 | 7284 | 695181 | 5203 | 496540 | < 0.0001 |
| miR-221      | 1000 | 701465 | 289  | 501454 | 752  | 701713 | 537  | 501206 | < 0.0001 |
| miR-199a-5p  | 2843 | 699622 | 1272 | 500471 | 2400 | 700065 | 1715 | 500028 | < 0.0001 |
| miR-372      | 446  | 702019 | 723  | 501020 | 682  | 701783 | 487  | 501256 | < 0.0001 |
| miR-518c     | 13   | 702452 | 166  | 501577 | 104  | 702361 | 75   | 501668 | < 0.0001 |
| miR-518f*    | 10   | 702455 | 158  | 501585 | 98   | 702367 | 70   | 501673 | < 0.0001 |
| miR-515-3p   | 27   | 702438 | 186  | 501557 | 124  | 702341 | 89   | 501654 | < 0.0001 |
| miR-516b     | 61   | 702404 | 237  | 501506 | 174  | 702291 | 124  | 501619 | < 0.0001 |
| miR-135b     | 250  | 702215 | 481  | 501262 | 426  | 702039 | 305  | 501438 | < 0.0001 |
| miR-140-3p   | 1023 | 701442 | 324  | 501419 | 786  | 701679 | 561  | 501182 | < 0.0001 |
| miR-509-3-5p | 255  | 702210 | 4    | 501739 | 151  | 702314 | 108  | 501635 | < 0.0001 |
| miR-145*     | 240  | 702225 | 463  | 501280 | 410  | 702055 | 293  | 501450 | < 0.0001 |
| miR-339-3p   | 87   | 702378 | 266  | 501477 | 206  | 702259 | 147  | 501596 | < 0.0001 |
| miR-21*      | 54   | 702411 | 217  | 501526 | 158  | 702307 | 113  | 501630 | < 0.0001 |
| miR-483-5p   | 390  | 702075 | 56   | 501687 | 260  | 702205 | 186  | 501557 | < 0.0001 |
| miR-518f     | 15   | 702450 | 141  | 501602 | 91   | 702374 | 65   | 501678 | < 0.0001 |
| miR-519d     | 34   | 702431 | 175  | 501568 | 122  | 702343 | 87   | 501656 | < 0.0001 |
| miR-10a      | 94   | 702371 | 262  | 501481 | 208  | 702257 | 148  | 501595 | < 0.0001 |
| miR-148a     | 58   | 702407 | 208  | 501535 | 155  | 702310 | 111  | 501632 | < 0.0001 |
| miR-513a-3p  | 219  | 702246 | 4    | 501739 | 130  | 702335 | 93   | 501650 | < 0.0001 |
| miR-371-5p   | 1120 | 701345 | 403  | 501340 | 888  | 701577 | 635  | 501108 | < 0.0001 |
| miR-337-3p   | 387  | 702078 | 593  | 501150 | 572  | 701893 | 408  | 501335 | < 0.0001 |
| miR-299-3p   | 408  | 702057 | 73   | 501670 | 281  | 702184 | 200  | 501543 | < 0.0001 |
| miR-31       | 29   | 702436 | 155  | 501588 | 107  | 702358 | 77   | 501666 | < 0.0001 |
| miR-525-5p   | 19   | 702446 | 136  | 501607 | 90   | 702375 | 65   | 501678 | < 0.0001 |
| miR-127-5p   | 322  | 702143 | 48   | 501695 | 216  | 702249 | 154  | 501589 | < 0.0001 |
| miR-197      | 62   | 702403 | 196  | 501547 | 151  | 702314 | 107  | 501636 | < 0.0001 |
| miR-517*     | 14   | 702451 | 118  | 501625 | 77   | 702388 | 55   | 501688 | < 0.0001 |

|             |      |        |      |        |      |        |      |        |          |
|-------------|------|--------|------|--------|------|--------|------|--------|----------|
| miR-340     | 155  | 702310 | 309  | 501434 | 271  | 702194 | 193  | 501550 | < 0.0001 |
| miR-186     | 1499 | 700966 | 645  | 501098 | 1251 | 701214 | 893  | 500850 | < 0.0001 |
| miR-512-5p  | 27   | 702438 | 137  | 501606 | 96   | 702369 | 68   | 501675 | < 0.0001 |
| miR-409-3p  | 357  | 702108 | 66   | 501677 | 247  | 702218 | 176  | 501567 | < 0.0001 |
| miR-371-3p  | 109  | 702356 | 246  | 501497 | 207  | 702258 | 148  | 501595 | < 0.0001 |
| miR-128     | 136  | 702329 | 277  | 501466 | 241  | 702224 | 172  | 501571 | < 0.0001 |
| miR-192     | 478  | 701987 | 635  | 501108 | 649  | 701816 | 464  | 501279 | < 0.0001 |
| miR-200b    | 9    | 702456 | 97   | 501646 | 62   | 702403 | 44   | 501699 | < 0.0001 |
| miR-9       | 78   | 702387 | 202  | 501541 | 163  | 702302 | 117  | 501626 | < 0.0001 |
| miR-23a*    | 164  | 702301 | 4    | 501739 | 98   | 702367 | 70   | 501673 | < 0.0001 |
| miR-664*    | 214  | 702251 | 20   | 501723 | 137  | 702328 | 97   | 501646 | < 0.0001 |
| miR-32      | 117  | 702348 | 247  | 501496 | 212  | 702253 | 152  | 501591 | < 0.0001 |
| miR-18a     | 78   | 702387 | 197  | 501546 | 160  | 702305 | 115  | 501628 | < 0.0001 |
| miR-126*    | 5166 | 697299 | 4513 | 497230 | 5646 | 696819 | 4033 | 497710 | < 0.0001 |
| miR-30d     | 1245 | 701220 | 1313 | 500430 | 1492 | 700973 | 1066 | 500677 | < 0.0001 |
| miR-324-5p  | 416  | 702049 | 106  | 501637 | 305  | 702160 | 217  | 501526 | < 0.0001 |
| miR-148b    | 51   | 702414 | 148  | 501595 | 116  | 702349 | 83   | 501660 | < 0.0001 |
| miR-450a    | 1274 | 701191 | 573  | 501170 | 1077 | 701388 | 770  | 500973 | < 0.0001 |
| miR-590-3p  | 49   | 702416 | 144  | 501599 | 113  | 702352 | 80   | 501663 | < 0.0001 |
| hsa-let-7d  | 4694 | 697771 | 2689 | 499054 | 4307 | 698158 | 3076 | 498667 | < 0.0001 |
| miR-34a     | 481  | 701984 | 151  | 501592 | 369  | 702096 | 263  | 501480 | < 0.0001 |
| miR-497     | 748  | 701717 | 289  | 501454 | 605  | 701860 | 432  | 501311 | < 0.0001 |
| miR-141*    | 5    | 702460 | 69   | 501674 | 43   | 702422 | 31   | 501712 | < 0.0001 |
| miR-526b*   | 5    | 702460 | 68   | 501675 | 43   | 702422 | 30   | 501713 | < 0.0001 |
| miR-10b     | 1491 | 700974 | 1472 | 500271 | 1728 | 700737 | 1235 | 500508 | < 0.0001 |
| miR-3613-5p | 48   | 702417 | 135  | 501608 | 107  | 702358 | 76   | 501667 | < 0.0001 |
| miR-101     | 1129 | 701336 | 1155 | 500588 | 1332 | 701133 | 952  | 500791 | < 0.0001 |
| miR-130b    | 194  | 702271 | 300  | 501443 | 288  | 702177 | 206  | 501537 | < 0.0001 |
| miR-660     | 1027 | 701438 | 455  | 501288 | 865  | 701600 | 617  | 501126 | < 0.0001 |
| miR-29b-2*  | 178  | 702287 | 25   | 501718 | 118  | 702347 | 85   | 501658 | < 0.0001 |

|             |      |        |      |        |      |        |      |        |          |
|-------------|------|--------|------|--------|------|--------|------|--------|----------|
| miR-193b*   | 184  | 702281 | 28   | 501715 | 124  | 702341 | 88   | 501655 | < 0.0001 |
| miR-345     | 29   | 702436 | 101  | 501642 | 76   | 702389 | 54   | 501689 | < 0.0001 |
| miR-378*    | 14   | 702451 | 77   | 501666 | 53   | 702412 | 38   | 501705 | < 0.0001 |
| miR-495     | 429  | 702036 | 522  | 501221 | 555  | 701910 | 396  | 501347 | < 0.0001 |
| miR-27b*    | 105  | 702360 | 196  | 501547 | 176  | 702289 | 125  | 501618 | < 0.0001 |
| miR-30a     | 463  | 702002 | 552  | 501191 | 592  | 701873 | 423  | 501320 | < 0.0001 |
| miR-181c    | 49   | 702416 | 127  | 501616 | 103  | 702362 | 73   | 501670 | < 0.0001 |
| miR-146b-5p | 176  | 702289 | 271  | 501472 | 261  | 702204 | 186  | 501557 | < 0.0001 |
| miR-520a-3p | 4    | 702461 | 56   | 501687 | 35   | 702430 | 25   | 501718 | < 0.0001 |
| miR-23c     | 18   | 702447 | 81   | 501662 | 58   | 702407 | 41   | 501702 | < 0.0001 |
| miR-411     | 339  | 702126 | 99   | 501644 | 256  | 702209 | 182  | 501561 | < 0.0001 |
| miR-126     | 4895 | 697570 | 4142 | 497601 | 5272 | 697193 | 3765 | 497978 | < 0.0001 |
| miR-375     | 7    | 702458 | 61   | 501682 | 40   | 702425 | 28   | 501715 | < 0.0001 |
| miR-523     | 8    | 702457 | 62   | 501681 | 41   | 702424 | 29   | 501714 | < 0.0001 |
| miR-154*    | 131  | 702334 | 218  | 501525 | 204  | 702261 | 145  | 501598 | < 0.0001 |
| miR-485-5p  | 165  | 702300 | 26   | 501717 | 111  | 702354 | 80   | 501663 | < 0.0001 |
| miR-2110    | 110  | 702355 | 7    | 501736 | 68   | 702397 | 49   | 501694 | < 0.0001 |
| miR-193b    | 392  | 702073 | 129  | 501614 | 304  | 702161 | 217  | 501526 | < 0.0001 |
| miR-1301    | 277  | 702188 | 74   | 501669 | 205  | 702260 | 146  | 501597 | < 0.0001 |
| miR-655     | 90   | 702375 | 170  | 501573 | 152  | 702313 | 108  | 501635 | < 0.0001 |
| miR-518c*   | 3    | 702462 | 49   | 501694 | 30   | 702435 | 22   | 501721 | < 0.0001 |
| miR-519e*   | 43   | 702422 | 108  | 501635 | 88   | 702377 | 63   | 501680 | < 0.0001 |
| miR-590-5p  | 28   | 702437 | 85   | 501658 | 66   | 702399 | 47   | 501696 | < 0.0001 |
| miR-30e*    | 1783 | 700682 | 1630 | 500113 | 1991 | 700474 | 1422 | 500321 | < 0.0001 |
| miR-99a*    | 137  | 702328 | 22   | 501721 | 93   | 702372 | 66   | 501677 | < 0.0001 |
| miR-548x    | 9    | 702456 | 54   | 501689 | 37   | 702428 | 26   | 501717 | < 0.0001 |
| miR-615-3p  | 12   | 702453 | 59   | 501684 | 41   | 702424 | 30   | 501713 | < 0.0001 |
| miR-24      | 1016 | 701449 | 992  | 500751 | 1171 | 701294 | 837  | 500906 | < 0.0001 |
| miR-152     | 179  | 702286 | 251  | 501492 | 251  | 702214 | 179  | 501564 | < 0.0001 |
| miR-744     | 315  | 702150 | 104  | 501639 | 244  | 702221 | 175  | 501568 | < 0.0001 |

|             |      |        |      |        |      |        |      |        |          |
|-------------|------|--------|------|--------|------|--------|------|--------|----------|
| miR-29a     | 4952 | 697513 | 4096 | 497647 | 5278 | 697187 | 3770 | 497973 | < 0.0001 |
| miR-505     | 76   | 702389 | 141  | 501602 | 127  | 702338 | 90   | 501653 | < 0.0001 |
| miR-210     | 263  | 702202 | 79   | 501664 | 200  | 702265 | 142  | 501601 | < 0.0001 |
| miR-520g    | 7    | 702458 | 49   | 501694 | 33   | 702432 | 23   | 501720 | < 0.0001 |
| miR-185     | 1096 | 701369 | 1052 | 500691 | 1253 | 701212 | 895  | 500848 | < 0.0001 |
| miR-382     | 257  | 702208 | 78   | 501665 | 195  | 702270 | 140  | 501603 | < 0.0001 |
| miR-200a    | 2    | 702463 | 37   | 501706 | 23   | 702442 | 16   | 501727 | < 0.0001 |
| miR-302c*   | 2    | 702463 | 37   | 501706 | 23   | 702442 | 16   | 501727 | < 0.0001 |
| miR-1269    | 4    | 702461 | 41   | 501702 | 26   | 702439 | 19   | 501724 | < 0.0001 |
| miR-151-3p  | 740  | 701725 | 342  | 501401 | 631  | 701834 | 451  | 501292 | < 0.0001 |
| miR-654-3p  | 146  | 702319 | 210  | 501533 | 208  | 702257 | 148  | 501595 | < 0.0001 |
| miR-199b-5p | 347  | 702118 | 401  | 501342 | 436  | 702029 | 312  | 501431 | < 0.0001 |
| miR-130b*   | 8    | 702457 | 46   | 501697 | 32   | 702433 | 22   | 501721 | < 0.0001 |
| miR-629     | 401  | 702064 | 157  | 501586 | 326  | 702139 | 232  | 501511 | < 0.0001 |
| miR-122     | 54   | 702411 | 108  | 501635 | 95   | 702370 | 67   | 501676 | < 0.0001 |
| miR-509-5p  | 71   | 702394 | 4    | 501739 | 44   | 702421 | 31   | 501712 | < 0.0001 |
| miR-7-1*    | 89   | 702376 | 146  | 501597 | 137  | 702328 | 98   | 501645 | < 0.0001 |
| miR-378c    | 29   | 702436 | 75   | 501668 | 61   | 702404 | 43   | 501700 | < 0.0001 |
| miR-129-5p  | 81   | 702384 | 8    | 501735 | 52   | 702413 | 37   | 501706 | < 0.0001 |
| miR-320b    | 231  | 702234 | 73   | 501670 | 177  | 702288 | 127  | 501616 | < 0.0001 |
| miR-135a    | 495  | 701970 | 521  | 501222 | 593  | 701872 | 423  | 501320 | < 0.0001 |
| miR-302d*   | 43   | 702422 | 91   | 501652 | 78   | 702387 | 56   | 501687 | < 0.0001 |
| miR-362-3p  | 56   | 702409 | 105  | 501638 | 94   | 702371 | 67   | 501676 | < 0.0001 |
| miR-487b    | 242  | 702223 | 81   | 501662 | 188  | 702277 | 135  | 501608 | < 0.0001 |
| miR-373*    | 181  | 702284 | 52   | 501691 | 136  | 702329 | 97   | 501646 | < 0.0001 |
| miR-18a*    | 17   | 702448 | 55   | 501688 | 42   | 702423 | 30   | 501713 | < 0.0001 |
| miR-542-3p  | 396  | 702069 | 166  | 501577 | 328  | 702137 | 234  | 501509 | < 0.0001 |
| miR-16-2*   | 60   | 702405 | 106  | 501637 | 97   | 702368 | 69   | 501674 | < 0.0001 |
| miR-133a    | 19   | 702446 | 56   | 501687 | 44   | 702421 | 31   | 501712 | < 0.0001 |
| miR-518d-3p | 8    | 702457 | 39   | 501704 | 27   | 702438 | 20   | 501723 | < 0.0001 |



|             |      |        |      |        |      |        |      |        |          |
|-------------|------|--------|------|--------|------|--------|------|--------|----------|
| miR-339-5p  | 39   | 702426 | 81   | 501662 | 70   | 702395 | 50   | 501693 | < 0.0001 |
| miR-125a-3p | 151  | 702314 | 41   | 501702 | 112  | 702353 | 80   | 501663 | < 0.0001 |
| miR-380     | 54   | 702411 | 98   | 501645 | 89   | 702376 | 63   | 501680 | < 0.0001 |
| miR-1296    | 9    | 702456 | 40   | 501703 | 29   | 702436 | 20   | 501723 | < 0.0001 |
| miR-181b    | 231  | 702234 | 82   | 501661 | 183  | 702282 | 130  | 501613 | < 0.0001 |
| miR-125a-5p | 3006 | 699459 | 1823 | 499920 | 2817 | 699648 | 2012 | 499731 | < 0.0001 |
| miR-521     | 4    | 702461 | 30   | 501713 | 20   | 702445 | 14   | 501729 | < 0.0001 |
| miR-1908    | 65   | 702400 | 7    | 501736 | 42   | 702423 | 30   | 501713 | < 0.0001 |
| miR-642b    | 6    | 702459 | 33   | 501710 | 23   | 702442 | 16   | 501727 | < 0.0001 |
| miR-411*    | 49   | 702416 | 89   | 501654 | 81   | 702384 | 57   | 501686 | < 0.0001 |
| miR-522     | 8    | 702457 | 36   | 501707 | 26   | 702439 | 18   | 501725 | < 0.0001 |
| miR-3609    | 4    | 702461 | 29   | 501714 | 19   | 702446 | 14   | 501729 | < 0.0001 |
| miR-493*    | 1089 | 701376 | 594  | 501149 | 982  | 701483 | 701  | 501042 | < 0.0001 |
| miR-184     | 127  | 702338 | 166  | 501577 | 171  | 702294 | 122  | 501621 | < 0.0001 |
| miR-874     | 138  | 702327 | 40   | 501703 | 104  | 702361 | 74   | 501669 | < 0.0001 |
| miR-517b    | 2    | 702463 | 23   | 501720 | 15   | 702450 | 10   | 501733 | < 0.0001 |
| miR-204     | 1198 | 701267 | 671  | 501072 | 1090 | 701375 | 779  | 500964 | < 0.0001 |
| miR-20a*    | 109  | 702356 | 146  | 501597 | 149  | 702316 | 106  | 501637 | < 0.0001 |
| miR-221*    | 5    | 702460 | 28   | 501715 | 19   | 702446 | 14   | 501729 | < 0.0001 |
| miR-222     | 580  | 701885 | 289  | 501454 | 507  | 701958 | 362  | 501381 | < 0.0001 |
| miR-520e    | 4    | 702461 | 26   | 501717 | 18   | 702447 | 12   | 501731 | < 0.0001 |
| miR-520d-5p | 2    | 702463 | 22   | 501721 | 14   | 702451 | 10   | 501733 | < 0.0001 |
| miR-26b*    | 8    | 702457 | 32   | 501711 | 23   | 702442 | 17   | 501726 | < 0.0001 |
| miR-488     | 10   | 702455 | 35   | 501708 | 26   | 702439 | 19   | 501724 | < 0.0001 |
| miR-362-5p  | 93   | 702372 | 22   | 501721 | 67   | 702398 | 48   | 501695 | < 0.0001 |
| miR-20a     | 357  | 702108 | 365  | 501378 | 421  | 702044 | 301  | 501442 | < 0.0001 |
| miR-30b*    | 73   | 702392 | 14   | 501729 | 51   | 702414 | 36   | 501707 | < 0.0001 |
| miR-525-3p  | 2    | 702463 | 21   | 501722 | 13   | 702452 | 10   | 501733 | < 0.0001 |
| miR-642a    | 2    | 702463 | 21   | 501722 | 13   | 702452 | 10   | 501733 | < 0.0001 |
| miR-449a    | 45   | 702420 | 4    | 501739 | 29   | 702436 | 20   | 501723 | < 0.0001 |

|         |    |        |   |        |    |        |    |        |          |
|---------|----|--------|---|--------|----|--------|----|--------|----------|
| miR-370 | 59 | 702406 | 9 | 501734 | 40 | 702425 | 28 | 501715 | < 0.0001 |
|---------|----|--------|---|--------|----|--------|----|--------|----------|

**Additional miRNAs detected (P>0.0001)**

|             |       |        |       |        |       |        |       |        |        |
|-------------|-------|--------|-------|--------|-------|--------|-------|--------|--------|
| miR-378     | 1544  | 700921 | 907   | 500836 | 1430  | 701035 | 1021  | 500722 | 0,0002 |
| miR-524-3p  | 8     | 702457 | 30    | 501713 | 22    | 702443 | 16    | 501727 | 0,0002 |
| miR-140-5p  | 933   | 701532 | 518   | 501225 | 846   | 701619 | 605   | 501138 | 0,0003 |
| miR-425     | 75    | 702390 | 106   | 501637 | 106   | 702359 | 75    | 501668 | 0,0003 |
| miR-323b-3p | 78    | 702387 | 18    | 501725 | 56    | 702409 | 40    | 501703 | 0,0004 |
| miR-369-3p  | 2217  | 700248 | 1825  | 499918 | 2358  | 700107 | 1684  | 500059 | 0,0004 |
| miR-376b    | 591   | 701874 | 550   | 501193 | 666   | 701799 | 475   | 501268 | 0,0005 |
| miR-664     | 19    | 702446 | 43    | 501700 | 36    | 702429 | 26    | 501717 | 0,0006 |
| miR-124     | 54    | 702411 | 82    | 501661 | 79    | 702386 | 57    | 501686 | 0,0007 |
| miR-31*     | 2     | 702463 | 18    | 501725 | 12    | 702453 | 8     | 501735 | 0,0007 |
| miR-98      | 756   | 701709 | 680   | 501063 | 838   | 701627 | 598   | 501145 | 0,0007 |
| miR-17*     | 513   | 701952 | 264   | 501479 | 453   | 702012 | 324   | 501419 | 0,0008 |
| miR-425*    | 179   | 702286 | 199   | 501544 | 221   | 702244 | 157   | 501586 | 0,0009 |
| miR-455-3p  | 75    | 702390 | 102   | 501641 | 103   | 702362 | 74    | 501669 | 0,0010 |
| miR-1277    | 8     | 702457 | 27    | 501716 | 20    | 702445 | 15    | 501728 | 0,0012 |
| miR-196b    | 2     | 702463 | 17    | 501726 | 11    | 702454 | 8     | 501735 | 0,0013 |
| miR-194     | 24    | 702441 | 47    | 501696 | 41    | 702424 | 30    | 501713 | 0,0015 |
| hsa-let-7f  | 24583 | 677882 | 16862 | 484881 | 24177 | 678288 | 17268 | 484475 | 0,0020 |
| miR-383     | 42    | 702423 | 6     | 501737 | 28    | 702437 | 20    | 501723 | 0,0021 |
| miR-505*    | 3     | 702462 | 18    | 501725 | 12    | 702453 | 9     | 501734 | 0,0021 |
| miR-514b-3p | 36    | 702429 | 4     | 501739 | 23    | 702442 | 17    | 501726 | 0,0024 |
| miR-379     | 169   | 702296 | 68    | 501675 | 138   | 702327 | 99    | 501644 | 0,0025 |
| miR-3180-3p | 72    | 702393 | 19    | 501724 | 53    | 702412 | 38    | 501705 | 0,0028 |
| miR-491-5p  | 41    | 702424 | 6     | 501737 | 27    | 702438 | 20    | 501723 | 0,0028 |
| miR-409-5p  | 78    | 702387 | 22    | 501721 | 58    | 702407 | 42    | 501701 | 0,0031 |
| miR-342-5p  | 50    | 702415 | 10    | 501733 | 35    | 702430 | 25    | 501718 | 0,0039 |
| miR-32*     | 65    | 702400 | 87    | 501656 | 89    | 702376 | 63    | 501680 | 0,0044 |

|             |      |        |      |        |      |        |      |        |        |
|-------------|------|--------|------|--------|------|--------|------|--------|--------|
| miR-154     | 235  | 702230 | 107  | 501636 | 200  | 702265 | 142  | 501601 | 0,0044 |
| miR-889     | 159  | 702306 | 65   | 501678 | 131  | 702334 | 93   | 501650 | 0,0053 |
| hsa-let-7i  | 7560 | 694905 | 5771 | 495972 | 7777 | 694688 | 5554 | 496189 | 0,0055 |
| miR-181a    | 2632 | 699833 | 1670 | 500073 | 2510 | 699955 | 1792 | 499951 | 0,0061 |
| miR-299-5p  | 103  | 702362 | 121  | 501622 | 131  | 702334 | 93   | 501650 | 0,0071 |
| miR-190b    | 35   | 702430 | 5    | 501738 | 23   | 702442 | 17   | 501726 | 0,0073 |
| miR-196a    | 7    | 702458 | 22   | 501721 | 17   | 702448 | 12   | 501731 | 0,0074 |
| miR-624*    | 2    | 702463 | 14   | 501729 | 9    | 702456 | 7    | 501736 | 0,0079 |
| miR-454     | 90   | 702375 | 30   | 501713 | 70   | 702395 | 50   | 501693 | 0,0083 |
| miR-30a*    | 546  | 701919 | 490  | 501253 | 604  | 701861 | 432  | 501311 | 0,0090 |
| miR-532-3p  | 111  | 702354 | 127  | 501616 | 139  | 702326 | 99   | 501644 | 0,0095 |
| miR-17      | 435  | 702030 | 231  | 501512 | 389  | 702076 | 277  | 501466 | 0,0096 |
| miR-147b    | 7    | 702458 | 21   | 501722 | 16   | 702449 | 12   | 501731 | 0,0123 |
| miR-493     | 357  | 702108 | 185  | 501558 | 316  | 702149 | 226  | 501517 | 0,0131 |
| miR-200c*   | 2    | 702463 | 13   | 501730 | 9    | 702456 | 6    | 501737 | 0,0140 |
| hsa-let-7b* | 229  | 702236 | 109  | 501634 | 197  | 702268 | 141  | 501602 | 0,0150 |
| miR-326     | 24   | 702441 | 41   | 501702 | 38   | 702427 | 27   | 501716 | 0,0155 |
| miR-181a-2* | 6    | 702459 | 19   | 501724 | 15   | 702450 | 10   | 501733 | 0,0164 |
| miR-520f    | 4    | 702461 | 16   | 501727 | 12   | 702453 | 8    | 501735 | 0,0167 |
| miR-548y    | 4    | 702461 | 16   | 501727 | 12   | 702453 | 8    | 501735 | 0,0167 |
| miR-183*    | 43   | 702422 | 60   | 501683 | 60   | 702405 | 43   | 501700 | 0,0201 |
| miR-135a*   | 28   | 702437 | 4    | 501739 | 19   | 702446 | 13   | 501730 | 0,0244 |
| miR-329     | 44   | 702421 | 60   | 501683 | 61   | 702404 | 43   | 501700 | 0,0267 |
| miR-1249    | 20   | 702445 | 35   | 501708 | 32   | 702433 | 23   | 501720 | 0,0274 |
| miR-1468    | 35   | 702430 | 7    | 501736 | 25   | 702440 | 17   | 501726 | 0,0289 |
| miR-95      | 207  | 702258 | 204  | 501539 | 240  | 702225 | 171  | 501572 | 0,0296 |
| miR-548c-5p | 11   | 702454 | 24   | 501719 | 20   | 702445 | 15   | 501728 | 0,0339 |
| miR-504     | 3    | 702462 | 13   | 501730 | 9    | 702456 | 7    | 501736 | 0,0354 |
| miR-576-3p  | 8    | 702457 | 20   | 501723 | 16   | 702449 | 12   | 501731 | 0,0371 |
| miR-497*    | 58   | 702407 | 18   | 501725 | 44   | 702421 | 32   | 501711 | 0,0386 |

|             |      |        |      |        |      |        |      |        |        |
|-------------|------|--------|------|--------|------|--------|------|--------|--------|
| miR-20b     | 13   | 702452 | 26   | 501717 | 23   | 702442 | 16   | 501727 | 0,0399 |
| miR-543     | 197  | 702268 | 95   | 501648 | 170  | 702295 | 122  | 501621 | 0,0401 |
| miR-144*    | 2    | 702463 | 11   | 501732 | 8    | 702457 | 5    | 501738 | 0,0427 |
| miR-301b    | 2    | 702463 | 11   | 501732 | 8    | 702457 | 5    | 501738 | 0,0427 |
| miR-429     | 2    | 702463 | 11   | 501732 | 8    | 702457 | 5    | 501738 | 0,0427 |
| miR-519e    | 2    | 702463 | 11   | 501732 | 8    | 702457 | 5    | 501738 | 0,0427 |
| miR-551a    | 2    | 702463 | 11   | 501732 | 8    | 702457 | 5    | 501738 | 0,0427 |
| miR-625*    | 2    | 702463 | 11   | 501732 | 8    | 702457 | 5    | 501738 | 0,0427 |
| miR-363     | 26   | 702439 | 40   | 501703 | 39   | 702426 | 27   | 501716 | 0,0450 |
| miR-942     | 10   | 702455 | 22   | 501721 | 19   | 702446 | 13   | 501730 | 0,0466 |
| miR-582-5p  | 4    | 702461 | 14   | 501729 | 11   | 702454 | 7    | 501736 | 0,0466 |
| miR-125b-1* | 71   | 702394 | 25   | 501718 | 56   | 702409 | 40   | 501703 | 0,0469 |
| miR-485-3p  | 33   | 702432 | 47   | 501696 | 47   | 702418 | 33   | 501710 | 0,0476 |
| miR-376a*   | 65   | 702400 | 22   | 501721 | 51   | 702414 | 36   | 501707 | 0,0477 |
| miR-550a*   | 12   | 702453 | 24   | 501719 | 21   | 702444 | 15   | 501728 | 0,0550 |
| miR-455-5p  | 33   | 702432 | 46   | 501697 | 46   | 702419 | 33   | 501710 | 0,0632 |
| miR-331-3p  | 67   | 702398 | 78   | 501665 | 85   | 702380 | 60   | 501683 | 0,0670 |
| miR-1287    | 29   | 702436 | 6    | 501737 | 20   | 702445 | 15   | 501728 | 0,0702 |
| miR-34c-3p  | 29   | 702436 | 6    | 501737 | 20   | 702445 | 15   | 501728 | 0,0702 |
| miR-155*    | 2    | 702463 | 10   | 501733 | 7    | 702458 | 5    | 501738 | 0,0727 |
| miR-556-5p  | 2    | 702463 | 10   | 501733 | 7    | 702458 | 5    | 501738 | 0,0727 |
| miR-2114    | 7    | 702458 | 17   | 501726 | 14   | 702451 | 10   | 501733 | 0,0780 |
| miR-34b*    | 26   | 702439 | 5    | 501738 | 18   | 702447 | 13   | 501730 | 0,0806 |
| miR-15b*    | 36   | 702429 | 48   | 501695 | 49   | 702416 | 35   | 501708 | 0,0819 |
| miR-29c     | 3474 | 698991 | 2301 | 499442 | 3369 | 699096 | 2406 | 499337 | 0,0945 |
| miR-935     | 3    | 702462 | 11   | 501732 | 8    | 702457 | 6    | 501737 | 0,0974 |
| miR-92b     | 235  | 702230 | 218  | 501525 | 264  | 702201 | 189  | 501554 | 0,1002 |
| miR-532-5p  | 158  | 702307 | 77   | 501666 | 137  | 702328 | 98   | 501645 | 0,1049 |
| miR-629*    | 6    | 702459 | 15   | 501728 | 12   | 702453 | 9    | 501734 | 0,1051 |
| miR-652     | 188  | 702277 | 95   | 501648 | 165  | 702300 | 118  | 501625 | 0,1059 |

|             |      |        |     |        |      |        |     |        |        |
|-------------|------|--------|-----|--------|------|--------|-----|--------|--------|
| miR-101*    | 21   | 702444 | 32  | 501711 | 31   | 702434 | 22  | 501721 | 0,1059 |
| miR-501-3p  | 23   | 702442 | 34  | 501709 | 33   | 702432 | 24  | 501719 | 0,1080 |
| miR-296-5p  | 11   | 702454 | 21  | 501722 | 19   | 702446 | 13  | 501730 | 0,1092 |
| miR-139-5p  | 51   | 702414 | 61  | 501682 | 65   | 702400 | 47  | 501696 | 0,1096 |
| miR-486-3p  | 36   | 702429 | 10  | 501733 | 27   | 702438 | 19  | 501724 | 0,1110 |
| miR-2355-5p | 4    | 702461 | 12  | 501731 | 9    | 702456 | 7   | 501736 | 0,1202 |
| miR-576-5p  | 4    | 702461 | 12  | 501731 | 9    | 702456 | 7   | 501736 | 0,1202 |
| miR-598     | 4    | 702461 | 12  | 501731 | 9    | 702456 | 7   | 501736 | 0,1202 |
| miR-106a    | 2    | 702463 | 9   | 501734 | 6    | 702459 | 5   | 501738 | 0,1210 |
| miR-1270    | 2    | 702463 | 9   | 501734 | 6    | 702459 | 5   | 501738 | 0,1210 |
| miR-191*    | 2    | 702463 | 9   | 501734 | 6    | 702459 | 5   | 501738 | 0,1210 |
| miR-1912    | 2    | 702463 | 9   | 501734 | 6    | 702459 | 5   | 501738 | 0,1210 |
| miR-100     | 1036 | 701429 | 837 | 500906 | 1093 | 701372 | 780 | 500963 | 0,1334 |
| miR-671-5p  | 43   | 702422 | 14  | 501729 | 33   | 702432 | 24  | 501719 | 0,1434 |
| miR-96*     | 47   | 702418 | 56  | 501687 | 60   | 702405 | 43  | 501700 | 0,1446 |
| miR-1185    | 30   | 702435 | 8   | 501735 | 22   | 702443 | 16  | 501727 | 0,1560 |
| miR-205*    | 6    | 702459 | 14  | 501729 | 12   | 702453 | 8   | 501735 | 0,1582 |
| miR-149     | 45   | 702420 | 53  | 501690 | 57   | 702408 | 41  | 501702 | 0,1836 |
| miR-187     | 27   | 702438 | 7   | 501736 | 20   | 702445 | 14  | 501729 | 0,1837 |
| miR-3158    | 4    | 702461 | 11  | 501732 | 9    | 702456 | 6   | 501737 | 0,1855 |
| miR-548e    | 4    | 702461 | 11  | 501732 | 9    | 702456 | 6   | 501737 | 0,1855 |
| miR-3606    | 8    | 702457 | 16  | 501727 | 14   | 702451 | 10  | 501733 | 0,1867 |
| miR-450b-5p | 235  | 702230 | 128 | 501615 | 212  | 702253 | 151 | 501592 | 0,1899 |
| miR-1251    | 2    | 702463 | 8   | 501735 | 6    | 702459 | 4   | 501739 | 0,1957 |
| miR-200a*   | 2    | 702463 | 8   | 501735 | 6    | 702459 | 4   | 501739 | 0,1957 |
| miR-3647-5p | 2    | 702463 | 8   | 501735 | 6    | 702459 | 4   | 501739 | 0,1957 |
| miR-548b-3p | 2    | 702463 | 8   | 501735 | 6    | 702459 | 4   | 501739 | 0,1957 |
| miR-29b-1*  | 47   | 702418 | 17  | 501726 | 37   | 702428 | 27  | 501716 | 0,1986 |
| miR-214*    | 50   | 702415 | 57  | 501686 | 62   | 702403 | 45  | 501698 | 0,2045 |
| miR-132     | 75   | 702390 | 79  | 501664 | 90   | 702375 | 64  | 501679 | 0,2083 |

|             |      |        |      |        |      |        |      |        |        |
|-------------|------|--------|------|--------|------|--------|------|--------|--------|
| miR-1228    | 5    | 702460 | 12   | 501731 | 10   | 702455 | 7    | 501736 | 0,2106 |
| hsa-let-7d* | 130  | 702335 | 125  | 501618 | 149  | 702316 | 106  | 501637 | 0,2248 |
| hsa-let-7g* | 30   | 702435 | 9    | 501734 | 23   | 702442 | 16   | 501727 | 0,2358 |
| miR-99b     | 575  | 701890 | 474  | 501269 | 612  | 701853 | 437  | 501306 | 0,2530 |
| miR-3614-5p | 8    | 702457 | 15   | 501728 | 13   | 702452 | 10   | 501733 | 0,2627 |
| miR-1255b   | 4    | 702461 | 10   | 501733 | 8    | 702457 | 6    | 501737 | 0,2769 |
| miR-3660    | 4    | 702461 | 10   | 501733 | 8    | 702457 | 6    | 501737 | 0,2769 |
| miR-323-3p  | 103  | 702362 | 50   | 501693 | 89   | 702376 | 64   | 501679 | 0,2788 |
| hsa-let-7a* | 186  | 702279 | 101  | 501642 | 167  | 702298 | 120  | 501623 | 0,2924 |
| miR-30d*    | 5    | 702460 | 11   | 501732 | 9    | 702456 | 7    | 501736 | 0,3053 |
| miR-106a*   | 2    | 702463 | 7    | 501736 | 5    | 702460 | 4    | 501739 | 0,3053 |
| miR-138     | 2    | 702463 | 7    | 501736 | 5    | 702460 | 4    | 501739 | 0,3053 |
| miR-148a*   | 2    | 702463 | 7    | 501736 | 5    | 702460 | 4    | 501739 | 0,3053 |
| miR-2115*   | 2    | 702463 | 7    | 501736 | 5    | 702460 | 4    | 501739 | 0,3053 |
| miR-3200-3p | 2    | 702463 | 7    | 501736 | 5    | 702460 | 4    | 501739 | 0,3053 |
| miR-3940    | 2    | 702463 | 7    | 501736 | 5    | 702460 | 4    | 501739 | 0,3053 |
| miR-548a-3p | 2    | 702463 | 7    | 501736 | 5    | 702460 | 4    | 501739 | 0,3053 |
| miR-548i    | 2    | 702463 | 7    | 501736 | 5    | 702460 | 4    | 501739 | 0,3053 |
| miR-579     | 2    | 702463 | 7    | 501736 | 5    | 702460 | 4    | 501739 | 0,3053 |
| miR-891b    | 2    | 702463 | 7    | 501736 | 5    | 702460 | 4    | 501739 | 0,3053 |
| miR-29b     | 2174 | 700291 | 1667 | 500076 | 2241 | 700224 | 1600 | 500143 | 0,3119 |
| miR-19b-1*  | 6    | 702459 | 12   | 501731 | 11   | 702454 | 7    | 501736 | 0,3275 |
| miR-33b     | 6    | 702459 | 12   | 501731 | 11   | 702454 | 7    | 501736 | 0,3275 |
| miR-1247    | 49   | 702416 | 20   | 501723 | 40   | 702425 | 29   | 501714 | 0,3349 |
| miR-93*     | 59   | 702406 | 62   | 501681 | 71   | 702394 | 50   | 501693 | 0,3351 |
| miR-708     | 198  | 702267 | 110  | 501633 | 180  | 702285 | 128  | 501615 | 0,3438 |
| miR-223*    | 7    | 702458 | 13   | 501730 | 12   | 702453 | 8    | 501735 | 0,3449 |
| miR-487a    | 56   | 702409 | 24   | 501719 | 47   | 702418 | 33   | 501710 | 0,3450 |
| miR-548d-5p | 24   | 702441 | 30   | 501713 | 32   | 702433 | 22   | 501721 | 0,3686 |
| miR-195*    | 39   | 702426 | 15   | 501728 | 32   | 702433 | 22   | 501721 | 0,3688 |

|             |     |        |     |        |     |        |     |        |        |
|-------------|-----|--------|-----|--------|-----|--------|-----|--------|--------|
| miR-139-3p  | 37  | 702428 | 14  | 501729 | 30  | 702435 | 21  | 501722 | 0,3745 |
| miR-374a*   | 129 | 702336 | 119 | 501624 | 145 | 702320 | 103 | 501640 | 0,3961 |
| miR-3687    | 4   | 702461 | 9   | 501734 | 8   | 702457 | 5   | 501738 | 0,3974 |
| miR-548o    | 4   | 702461 | 9   | 501734 | 8   | 702457 | 5   | 501738 | 0,3974 |
| miR-760     | 16  | 702449 | 4   | 501739 | 12  | 702453 | 8   | 501735 | 0,4249 |
| miR-340*    | 23  | 702442 | 28  | 501715 | 30  | 702435 | 21  | 501722 | 0,4516 |
| miR-1264    | 2   | 702463 | 6   | 501737 | 5   | 702460 | 3   | 501740 | 0,4544 |
| miR-1273e   | 2   | 702463 | 6   | 501737 | 5   | 702460 | 3   | 501740 | 0,4544 |
| miR-146a*   | 2   | 702463 | 6   | 501737 | 5   | 702460 | 3   | 501740 | 0,4544 |
| miR-18b     | 2   | 702463 | 6   | 501737 | 5   | 702460 | 3   | 501740 | 0,4544 |
| miR-208a    | 2   | 702463 | 6   | 501737 | 5   | 702460 | 3   | 501740 | 0,4544 |
| miR-20b*    | 2   | 702463 | 6   | 501737 | 5   | 702460 | 3   | 501740 | 0,4544 |
| miR-217     | 2   | 702463 | 6   | 501737 | 5   | 702460 | 3   | 501740 | 0,4544 |
| miR-218-1*  | 2   | 702463 | 6   | 501737 | 5   | 702460 | 3   | 501740 | 0,4544 |
| miR-24-2*   | 2   | 702463 | 6   | 501737 | 5   | 702460 | 3   | 501740 | 0,4544 |
| miR-3065-3p | 2   | 702463 | 6   | 501737 | 5   | 702460 | 3   | 501740 | 0,4544 |
| miR-338-5p  | 2   | 702463 | 6   | 501737 | 5   | 702460 | 3   | 501740 | 0,4544 |
| miR-3620    | 2   | 702463 | 6   | 501737 | 5   | 702460 | 3   | 501740 | 0,4544 |
| miR-4326    | 2   | 702463 | 6   | 501737 | 5   | 702460 | 3   | 501740 | 0,4544 |
| miR-548c-3p | 2   | 702463 | 6   | 501737 | 5   | 702460 | 3   | 501740 | 0,4544 |
| miR-548p    | 2   | 702463 | 6   | 501737 | 5   | 702460 | 3   | 501740 | 0,4544 |
| miR-643     | 2   | 702463 | 6   | 501737 | 5   | 702460 | 3   | 501740 | 0,4544 |
| miR-550a    | 24  | 702441 | 8   | 501735 | 19  | 702446 | 13  | 501730 | 0,4544 |
| miR-941     | 7   | 702458 | 12  | 501731 | 11  | 702454 | 8   | 501735 | 0,4612 |
| miR-374b*   | 20  | 702445 | 25  | 501718 | 26  | 702439 | 19  | 501724 | 0,4670 |
| miR-125b-2* | 37  | 702428 | 15  | 501728 | 30  | 702435 | 22  | 501721 | 0,4754 |
| miR-1303    | 37  | 702428 | 15  | 501728 | 30  | 702435 | 22  | 501721 | 0,4754 |
| hsa-let-7e* | 9   | 702456 | 14  | 501729 | 13  | 702452 | 10  | 501733 | 0,4794 |
| miR-377*    | 16  | 702449 | 21  | 501722 | 22  | 702443 | 15  | 501728 | 0,4829 |
| miR-544     | 15  | 702450 | 20  | 501723 | 20  | 702445 | 15  | 501728 | 0,4856 |

|             |     |        |     |        |     |        |     |        |        |
|-------------|-----|--------|-----|--------|-----|--------|-----|--------|--------|
| miR-153     | 11  | 702454 | 16  | 501727 | 16  | 702449 | 11  | 501732 | 0,4873 |
| miR-548aa   | 12  | 702453 | 17  | 501726 | 17  | 702448 | 12  | 501731 | 0,4886 |
| miR-22*     | 263 | 702202 | 156 | 501587 | 244 | 702221 | 175 | 501568 | 0,4947 |
| miR-29c*    | 150 | 702315 | 133 | 501610 | 165 | 702300 | 118 | 501625 | 0,5074 |
| miR-1179    | 3   | 702462 | 7   | 501736 | 6   | 702459 | 4   | 501739 | 0,5084 |
| miR-19a*    | 3   | 702462 | 7   | 501736 | 6   | 702459 | 4   | 501739 | 0,5084 |
| miR-3614-3p | 3   | 702462 | 7   | 501736 | 6   | 702459 | 4   | 501739 | 0,5084 |
| miR-539     | 3   | 702462 | 7   | 501736 | 6   | 702459 | 4   | 501739 | 0,5084 |
| miR-559     | 3   | 702462 | 7   | 501736 | 6   | 702459 | 4   | 501739 | 0,5084 |
| miR-30c-2*  | 24  | 702441 | 28  | 501715 | 30  | 702435 | 22  | 501721 | 0,5291 |
| miR-367*    | 4   | 702461 | 8   | 501735 | 7   | 702458 | 5   | 501738 | 0,5435 |
| miR-3688    | 4   | 702461 | 8   | 501735 | 7   | 702458 | 5   | 501738 | 0,5435 |
| miR-625     | 34  | 702431 | 14  | 501729 | 28  | 702437 | 20  | 501723 | 0,5436 |
| miR-93      | 300 | 702165 | 182 | 501561 | 281 | 702184 | 201 | 501542 | 0,5532 |
| miR-410     | 39  | 702426 | 41  | 501702 | 47  | 702418 | 33  | 501710 | 0,5539 |
| miR-501-5p  | 30  | 702435 | 33  | 501710 | 37  | 702428 | 26  | 501717 | 0,5618 |
| miR-106b*   | 70  | 702395 | 67  | 501676 | 80  | 702385 | 57  | 501686 | 0,5655 |
| miR-1307    | 51  | 702414 | 51  | 501692 | 60  | 702405 | 42  | 501701 | 0,5721 |
| miR-876-5p  | 6   | 702459 | 10  | 501733 | 9   | 702456 | 7   | 501736 | 0,5820 |
| miR-548n    | 14  | 702451 | 4   | 501739 | 11  | 702454 | 7   | 501736 | 0,5919 |
| miR-502-5p  | 22  | 702443 | 8   | 501735 | 18  | 702447 | 12  | 501731 | 0,5958 |
| miR-34c-5p  | 16  | 702449 | 5   | 501738 | 12  | 702453 | 9   | 501734 | 0,5996 |
| miR-92b*    | 18  | 702447 | 6   | 501737 | 14  | 702451 | 10  | 501733 | 0,6018 |
| miR-324-3p  | 55  | 702410 | 27  | 501716 | 48  | 702417 | 34  | 501709 | 0,6310 |
| miR-1246    | 2   | 702463 | 5   | 501738 | 4   | 702461 | 3   | 501740 | 0,6355 |
| miR-1276    | 2   | 702463 | 5   | 501738 | 4   | 702461 | 3   | 501740 | 0,6355 |
| miR-1537    | 2   | 702463 | 5   | 501738 | 4   | 702461 | 3   | 501740 | 0,6355 |
| miR-1972    | 2   | 702463 | 5   | 501738 | 4   | 702461 | 3   | 501740 | 0,6355 |
| miR-3129    | 2   | 702463 | 5   | 501738 | 4   | 702461 | 3   | 501740 | 0,6355 |
| miR-3133    | 2   | 702463 | 5   | 501738 | 4   | 702461 | 3   | 501740 | 0,6355 |



|             |   |        |   |        |   |        |   |        |        |
|-------------|---|--------|---|--------|---|--------|---|--------|--------|
| miR-3143    | 2 | 702463 | 5 | 501738 | 4 | 702461 | 3 | 501740 | 0,6355 |
| miR-3148    | 2 | 702463 | 5 | 501738 | 4 | 702461 | 3 | 501740 | 0,6355 |
| miR-3156    | 2 | 702463 | 5 | 501738 | 4 | 702461 | 3 | 501740 | 0,6355 |
| miR-3166    | 2 | 702463 | 5 | 501738 | 4 | 702461 | 3 | 501740 | 0,6355 |
| miR-3192    | 2 | 702463 | 5 | 501738 | 4 | 702461 | 3 | 501740 | 0,6355 |
| miR-323b-5p | 2 | 702463 | 5 | 501738 | 4 | 702461 | 3 | 501740 | 0,6355 |
| miR-330-5p  | 2 | 702463 | 5 | 501738 | 4 | 702461 | 3 | 501740 | 0,6355 |
| miR-33b*    | 2 | 702463 | 5 | 501738 | 4 | 702461 | 3 | 501740 | 0,6355 |
| miR-365*    | 2 | 702463 | 5 | 501738 | 4 | 702461 | 3 | 501740 | 0,6355 |
| miR-3667-3p | 2 | 702463 | 5 | 501738 | 4 | 702461 | 3 | 501740 | 0,6355 |
| miR-3667-5p | 2 | 702463 | 5 | 501738 | 4 | 702461 | 3 | 501740 | 0,6355 |
| miR-3684    | 2 | 702463 | 5 | 501738 | 4 | 702461 | 3 | 501740 | 0,6355 |
| miR-3910    | 2 | 702463 | 5 | 501738 | 4 | 702461 | 3 | 501740 | 0,6355 |
| miR-3944    | 2 | 702463 | 5 | 501738 | 4 | 702461 | 3 | 501740 | 0,6355 |
| miR-412     | 2 | 702463 | 5 | 501738 | 4 | 702461 | 3 | 501740 | 0,6355 |
| miR-454*    | 2 | 702463 | 5 | 501738 | 4 | 702461 | 3 | 501740 | 0,6355 |
| miR-491-3p  | 2 | 702463 | 5 | 501738 | 4 | 702461 | 3 | 501740 | 0,6355 |
| miR-499-3p  | 2 | 702463 | 5 | 501738 | 4 | 702461 | 3 | 501740 | 0,6355 |
| miR-548a-5p | 2 | 702463 | 5 | 501738 | 4 | 702461 | 3 | 501740 | 0,6355 |
| miR-548d-3p | 2 | 702463 | 5 | 501738 | 4 | 702461 | 3 | 501740 | 0,6355 |
| miR-548g    | 2 | 702463 | 5 | 501738 | 4 | 702461 | 3 | 501740 | 0,6355 |
| miR-548j    | 2 | 702463 | 5 | 501738 | 4 | 702461 | 3 | 501740 | 0,6355 |
| miR-548m    | 2 | 702463 | 5 | 501738 | 4 | 702461 | 3 | 501740 | 0,6355 |
| miR-549     | 2 | 702463 | 5 | 501738 | 4 | 702461 | 3 | 501740 | 0,6355 |
| miR-552     | 2 | 702463 | 5 | 501738 | 4 | 702461 | 3 | 501740 | 0,6355 |
| miR-616*    | 2 | 702463 | 5 | 501738 | 4 | 702461 | 3 | 501740 | 0,6355 |
| miR-624     | 2 | 702463 | 5 | 501738 | 4 | 702461 | 3 | 501740 | 0,6355 |
| miR-627     | 2 | 702463 | 5 | 501738 | 4 | 702461 | 3 | 501740 | 0,6355 |
| miR-875-5p  | 2 | 702463 | 5 | 501738 | 4 | 702461 | 3 | 501740 | 0,6355 |
| miR-877*    | 2 | 702463 | 5 | 501738 | 4 | 702461 | 3 | 501740 | 0,6355 |

|             |      |        |      |        |      |        |      |        |        |
|-------------|------|--------|------|--------|------|--------|------|--------|--------|
| miR-885-5p  | 2    | 702463 | 5    | 501738 | 4    | 702461 | 3    | 501740 | 0,6355 |
| miR-628-5p  | 23   | 702442 | 9    | 501734 | 19   | 702446 | 13   | 501730 | 0,6601 |
| miR-499-5p  | 48   | 702417 | 47   | 501696 | 55   | 702410 | 40   | 501703 | 0,6657 |
| miR-1304    | 3    | 702462 | 6    | 501737 | 5    | 702460 | 4    | 501739 | 0,6781 |
| miR-2113    | 3    | 702462 | 6    | 501737 | 5    | 702460 | 4    | 501739 | 0,6781 |
| miR-377     | 220  | 702245 | 133  | 501610 | 206  | 702259 | 147  | 501596 | 0,6787 |
| miR-369-5p  | 40   | 702425 | 40   | 501703 | 47   | 702418 | 33   | 501710 | 0,6833 |
| miR-135b*   | 15   | 702450 | 5    | 501738 | 12   | 702453 | 8    | 501735 | 0,6834 |
| miR-379*    | 33   | 702432 | 34   | 501709 | 39   | 702426 | 28   | 501715 | 0,6857 |
| miR-548z    | 14   | 702451 | 17   | 501726 | 18   | 702447 | 13   | 501730 | 0,6966 |
| miR-137     | 4    | 702461 | 7    | 501736 | 6    | 702459 | 5    | 501738 | 0,7018 |
| miR-192*    | 4    | 702461 | 7    | 501736 | 6    | 702459 | 5    | 501738 | 0,7018 |
| miR-548b-5p | 4    | 702461 | 7    | 501736 | 6    | 702459 | 5    | 501738 | 0,7018 |
| miR-589     | 4    | 702461 | 7    | 501736 | 6    | 702459 | 5    | 501738 | 0,7018 |
| miR-33a*    | 65   | 702400 | 34   | 501709 | 58   | 702407 | 41   | 501702 | 0,7019 |
| miR-181d    | 13   | 702452 | 16   | 501727 | 17   | 702448 | 12   | 501731 | 0,7033 |
| miR-188-3p  | 12   | 702453 | 15   | 501728 | 16   | 702449 | 11   | 501732 | 0,7094 |
| miR-3676    | 5    | 702460 | 8    | 501735 | 8    | 702457 | 5    | 501738 | 0,7151 |
| miR-423-3p  | 24   | 702441 | 10   | 501733 | 20   | 702445 | 14   | 501729 | 0,7173 |
| miR-296-3p  | 10   | 702455 | 13   | 501730 | 13   | 702452 | 10   | 501733 | 0,7195 |
| miR-3613-3p | 10   | 702455 | 13   | 501730 | 13   | 702452 | 10   | 501733 | 0,7195 |
| miR-3180-5p | 6    | 702459 | 9    | 501734 | 9    | 702456 | 6    | 501737 | 0,7221 |
| miR-3117    | 8    | 702457 | 11   | 501732 | 11   | 702454 | 8    | 501735 | 0,7249 |
| miR-665     | 56   | 702409 | 29   | 501714 | 50   | 702415 | 35   | 501708 | 0,7371 |
| miR-190     | 68   | 702397 | 62   | 501681 | 76   | 702389 | 54   | 501689 | 0,7463 |
| hsa-let-7i* | 44   | 702421 | 42   | 501701 | 50   | 702415 | 36   | 501707 | 0,7688 |
| miR-767-3p  | 52   | 702413 | 48   | 501695 | 58   | 702407 | 42   | 501701 | 0,7996 |
| miR-3915    | 12   | 702453 | 14   | 501729 | 15   | 702450 | 11   | 501732 | 0,8111 |
| miR-191     | 5855 | 696610 | 4077 | 497666 | 5794 | 696671 | 4138 | 497605 | 0,8147 |
| miR-1178    | 2    | 702463 | 4    | 501739 | 4    | 702461 | 2    | 501741 | 0,8190 |

|             |   |        |   |        |   |        |   |        |        |
|-------------|---|--------|---|--------|---|--------|---|--------|--------|
| miR-1181    | 2 | 702463 | 4 | 501739 | 4 | 702461 | 2 | 501741 | 0,8190 |
| miR-1182    | 2 | 702463 | 4 | 501739 | 4 | 702461 | 2 | 501741 | 0,8190 |
| miR-1183    | 2 | 702463 | 4 | 501739 | 4 | 702461 | 2 | 501741 | 0,8190 |
| miR-1184    | 2 | 702463 | 4 | 501739 | 4 | 702461 | 2 | 501741 | 0,8190 |
| miR-1193    | 2 | 702463 | 4 | 501739 | 4 | 702461 | 2 | 501741 | 0,8190 |
| miR-1200    | 2 | 702463 | 4 | 501739 | 4 | 702461 | 2 | 501741 | 0,8190 |
| miR-1202    | 2 | 702463 | 4 | 501739 | 4 | 702461 | 2 | 501741 | 0,8190 |
| miR-1203    | 2 | 702463 | 4 | 501739 | 4 | 702461 | 2 | 501741 | 0,8190 |
| miR-1204    | 2 | 702463 | 4 | 501739 | 4 | 702461 | 2 | 501741 | 0,8190 |
| miR-1205    | 2 | 702463 | 4 | 501739 | 4 | 702461 | 2 | 501741 | 0,8190 |
| miR-1206    | 2 | 702463 | 4 | 501739 | 4 | 702461 | 2 | 501741 | 0,8190 |
| miR-1207-3p | 2 | 702463 | 4 | 501739 | 4 | 702461 | 2 | 501741 | 0,8190 |
| miR-1207-5p | 2 | 702463 | 4 | 501739 | 4 | 702461 | 2 | 501741 | 0,8190 |
| miR-1208    | 2 | 702463 | 4 | 501739 | 4 | 702461 | 2 | 501741 | 0,8190 |
| miR-122*    | 2 | 702463 | 4 | 501739 | 4 | 702461 | 2 | 501741 | 0,8190 |
| miR-1224-5p | 2 | 702463 | 4 | 501739 | 4 | 702461 | 2 | 501741 | 0,8190 |
| miR-1225-3p | 2 | 702463 | 4 | 501739 | 4 | 702461 | 2 | 501741 | 0,8190 |
| miR-1225-5p | 2 | 702463 | 4 | 501739 | 4 | 702461 | 2 | 501741 | 0,8190 |
| miR-1226    | 2 | 702463 | 4 | 501739 | 4 | 702461 | 2 | 501741 | 0,8190 |
| miR-1226*   | 2 | 702463 | 4 | 501739 | 4 | 702461 | 2 | 501741 | 0,8190 |
| miR-1227    | 2 | 702463 | 4 | 501739 | 4 | 702461 | 2 | 501741 | 0,8190 |
| miR-1229    | 2 | 702463 | 4 | 501739 | 4 | 702461 | 2 | 501741 | 0,8190 |
| miR-1231    | 2 | 702463 | 4 | 501739 | 4 | 702461 | 2 | 501741 | 0,8190 |
| miR-1233    | 2 | 702463 | 4 | 501739 | 4 | 702461 | 2 | 501741 | 0,8190 |
| miR-1234    | 2 | 702463 | 4 | 501739 | 4 | 702461 | 2 | 501741 | 0,8190 |
| miR-1236    | 2 | 702463 | 4 | 501739 | 4 | 702461 | 2 | 501741 | 0,8190 |
| miR-1237    | 2 | 702463 | 4 | 501739 | 4 | 702461 | 2 | 501741 | 0,8190 |
| miR-1238    | 2 | 702463 | 4 | 501739 | 4 | 702461 | 2 | 501741 | 0,8190 |
| miR-1244    | 2 | 702463 | 4 | 501739 | 4 | 702461 | 2 | 501741 | 0,8190 |
| miR-1245    | 2 | 702463 | 4 | 501739 | 4 | 702461 | 2 | 501741 | 0,8190 |

|           |   |        |   |        |   |        |   |        |        |
|-----------|---|--------|---|--------|---|--------|---|--------|--------|
| miR-1252  | 2 | 702463 | 4 | 501739 | 4 | 702461 | 2 | 501741 | 0,8190 |
| miR-1256  | 2 | 702463 | 4 | 501739 | 4 | 702461 | 2 | 501741 | 0,8190 |
| miR-1257  | 2 | 702463 | 4 | 501739 | 4 | 702461 | 2 | 501741 | 0,8190 |
| miR-1260  | 2 | 702463 | 4 | 501739 | 4 | 702461 | 2 | 501741 | 0,8190 |
| miR-1260b | 2 | 702463 | 4 | 501739 | 4 | 702461 | 2 | 501741 | 0,8190 |
| miR-1261  | 2 | 702463 | 4 | 501739 | 4 | 702461 | 2 | 501741 | 0,8190 |
| miR-1263  | 2 | 702463 | 4 | 501739 | 4 | 702461 | 2 | 501741 | 0,8190 |
| miR-1265  | 2 | 702463 | 4 | 501739 | 4 | 702461 | 2 | 501741 | 0,8190 |
| miR-1268  | 2 | 702463 | 4 | 501739 | 4 | 702461 | 2 | 501741 | 0,8190 |
| miR-1272  | 2 | 702463 | 4 | 501739 | 4 | 702461 | 2 | 501741 | 0,8190 |
| miR-1273  | 2 | 702463 | 4 | 501739 | 4 | 702461 | 2 | 501741 | 0,8190 |
| miR-1273c | 2 | 702463 | 4 | 501739 | 4 | 702461 | 2 | 501741 | 0,8190 |
| miR-1274a | 2 | 702463 | 4 | 501739 | 4 | 702461 | 2 | 501741 | 0,8190 |
| miR-1274b | 2 | 702463 | 4 | 501739 | 4 | 702461 | 2 | 501741 | 0,8190 |
| miR-1275  | 2 | 702463 | 4 | 501739 | 4 | 702461 | 2 | 501741 | 0,8190 |
| miR-1278  | 2 | 702463 | 4 | 501739 | 4 | 702461 | 2 | 501741 | 0,8190 |
| miR-1279  | 2 | 702463 | 4 | 501739 | 4 | 702461 | 2 | 501741 | 0,8190 |
| miR-1280  | 2 | 702463 | 4 | 501739 | 4 | 702461 | 2 | 501741 | 0,8190 |
| miR-1281  | 2 | 702463 | 4 | 501739 | 4 | 702461 | 2 | 501741 | 0,8190 |
| miR-1282  | 2 | 702463 | 4 | 501739 | 4 | 702461 | 2 | 501741 | 0,8190 |
| miR-1284  | 2 | 702463 | 4 | 501739 | 4 | 702461 | 2 | 501741 | 0,8190 |
| miR-1286  | 2 | 702463 | 4 | 501739 | 4 | 702461 | 2 | 501741 | 0,8190 |
| miR-1288  | 2 | 702463 | 4 | 501739 | 4 | 702461 | 2 | 501741 | 0,8190 |
| miR-1289  | 2 | 702463 | 4 | 501739 | 4 | 702461 | 2 | 501741 | 0,8190 |
| miR-1290  | 2 | 702463 | 4 | 501739 | 4 | 702461 | 2 | 501741 | 0,8190 |
| miR-1291  | 2 | 702463 | 4 | 501739 | 4 | 702461 | 2 | 501741 | 0,8190 |
| miR-1292  | 2 | 702463 | 4 | 501739 | 4 | 702461 | 2 | 501741 | 0,8190 |
| miR-1293  | 2 | 702463 | 4 | 501739 | 4 | 702461 | 2 | 501741 | 0,8190 |
| miR-1297  | 2 | 702463 | 4 | 501739 | 4 | 702461 | 2 | 501741 | 0,8190 |
| miR-1298  | 2 | 702463 | 4 | 501739 | 4 | 702461 | 2 | 501741 | 0,8190 |

|            |   |        |   |        |   |        |   |        |        |
|------------|---|--------|---|--------|---|--------|---|--------|--------|
| miR-1302   | 2 | 702463 | 4 | 501739 | 4 | 702461 | 2 | 501741 | 0,8190 |
| miR-1305   | 2 | 702463 | 4 | 501739 | 4 | 702461 | 2 | 501741 | 0,8190 |
| miR-1306   | 2 | 702463 | 4 | 501739 | 4 | 702461 | 2 | 501741 | 0,8190 |
| miR-130a*  | 2 | 702463 | 4 | 501739 | 4 | 702461 | 2 | 501741 | 0,8190 |
| miR-1321   | 2 | 702463 | 4 | 501739 | 4 | 702461 | 2 | 501741 | 0,8190 |
| miR-1322   | 2 | 702463 | 4 | 501739 | 4 | 702461 | 2 | 501741 | 0,8190 |
| miR-1324   | 2 | 702463 | 4 | 501739 | 4 | 702461 | 2 | 501741 | 0,8190 |
| miR-133b   | 2 | 702463 | 4 | 501739 | 4 | 702461 | 2 | 501741 | 0,8190 |
| miR-138-1* | 2 | 702463 | 4 | 501739 | 4 | 702461 | 2 | 501741 | 0,8190 |
| miR-138-2* | 2 | 702463 | 4 | 501739 | 4 | 702461 | 2 | 501741 | 0,8190 |
| miR-1469   | 2 | 702463 | 4 | 501739 | 4 | 702461 | 2 | 501741 | 0,8190 |
| miR-147    | 2 | 702463 | 4 | 501739 | 4 | 702461 | 2 | 501741 | 0,8190 |
| miR-1470   | 2 | 702463 | 4 | 501739 | 4 | 702461 | 2 | 501741 | 0,8190 |
| miR-1471   | 2 | 702463 | 4 | 501739 | 4 | 702461 | 2 | 501741 | 0,8190 |
| miR-148b*  | 2 | 702463 | 4 | 501739 | 4 | 702461 | 2 | 501741 | 0,8190 |
| miR-1538   | 2 | 702463 | 4 | 501739 | 4 | 702461 | 2 | 501741 | 0,8190 |
| miR-1539   | 2 | 702463 | 4 | 501739 | 4 | 702461 | 2 | 501741 | 0,8190 |
| miR-182*   | 2 | 702463 | 4 | 501739 | 4 | 702461 | 2 | 501741 | 0,8190 |
| miR-1825   | 2 | 702463 | 4 | 501739 | 4 | 702461 | 2 | 501741 | 0,8190 |
| miR-1827   | 2 | 702463 | 4 | 501739 | 4 | 702461 | 2 | 501741 | 0,8190 |
| miR-185*   | 2 | 702463 | 4 | 501739 | 4 | 702461 | 2 | 501741 | 0,8190 |
| miR-18b*   | 2 | 702463 | 4 | 501739 | 4 | 702461 | 2 | 501741 | 0,8190 |
| miR-1909   | 2 | 702463 | 4 | 501739 | 4 | 702461 | 2 | 501741 | 0,8190 |
| miR-1909*  | 2 | 702463 | 4 | 501739 | 4 | 702461 | 2 | 501741 | 0,8190 |
| miR-1910   | 2 | 702463 | 4 | 501739 | 4 | 702461 | 2 | 501741 | 0,8190 |
| miR-1911   | 2 | 702463 | 4 | 501739 | 4 | 702461 | 2 | 501741 | 0,8190 |
| miR-1911*  | 2 | 702463 | 4 | 501739 | 4 | 702461 | 2 | 501741 | 0,8190 |
| miR-1913   | 2 | 702463 | 4 | 501739 | 4 | 702461 | 2 | 501741 | 0,8190 |
| miR-1914   | 2 | 702463 | 4 | 501739 | 4 | 702461 | 2 | 501741 | 0,8190 |
| miR-1915   | 2 | 702463 | 4 | 501739 | 4 | 702461 | 2 | 501741 | 0,8190 |

|              |   |        |   |        |   |        |   |        |        |
|--------------|---|--------|---|--------|---|--------|---|--------|--------|
| miR-1915*    | 2 | 702463 | 4 | 501739 | 4 | 702461 | 2 | 501741 | 0,8190 |
| miR-196a*    | 2 | 702463 | 4 | 501739 | 4 | 702461 | 2 | 501741 | 0,8190 |
| miR-196b*    | 2 | 702463 | 4 | 501739 | 4 | 702461 | 2 | 501741 | 0,8190 |
| miR-1973     | 2 | 702463 | 4 | 501739 | 4 | 702461 | 2 | 501741 | 0,8190 |
| miR-1976     | 2 | 702463 | 4 | 501739 | 4 | 702461 | 2 | 501741 | 0,8190 |
| miR-198      | 2 | 702463 | 4 | 501739 | 4 | 702461 | 2 | 501741 | 0,8190 |
| miR-2052     | 2 | 702463 | 4 | 501739 | 4 | 702461 | 2 | 501741 | 0,8190 |
| miR-2053     | 2 | 702463 | 4 | 501739 | 4 | 702461 | 2 | 501741 | 0,8190 |
| miR-2054     | 2 | 702463 | 4 | 501739 | 4 | 702461 | 2 | 501741 | 0,8190 |
| miR-208b     | 2 | 702463 | 4 | 501739 | 4 | 702461 | 2 | 501741 | 0,8190 |
| miR-2114*    | 2 | 702463 | 4 | 501739 | 4 | 702461 | 2 | 501741 | 0,8190 |
| miR-2115     | 2 | 702463 | 4 | 501739 | 4 | 702461 | 2 | 501741 | 0,8190 |
| miR-2116*    | 2 | 702463 | 4 | 501739 | 4 | 702461 | 2 | 501741 | 0,8190 |
| miR-2117     | 2 | 702463 | 4 | 501739 | 4 | 702461 | 2 | 501741 | 0,8190 |
| miR-216b     | 2 | 702463 | 4 | 501739 | 4 | 702461 | 2 | 501741 | 0,8190 |
| miR-218-2*   | 2 | 702463 | 4 | 501739 | 4 | 702461 | 2 | 501741 | 0,8190 |
| miR-219-1-3p | 2 | 702463 | 4 | 501739 | 4 | 702461 | 2 | 501741 | 0,8190 |
| miR-219-2-3p | 2 | 702463 | 4 | 501739 | 4 | 702461 | 2 | 501741 | 0,8190 |
| miR-224*     | 2 | 702463 | 4 | 501739 | 4 | 702461 | 2 | 501741 | 0,8190 |
| miR-2276     | 2 | 702463 | 4 | 501739 | 4 | 702461 | 2 | 501741 | 0,8190 |
| miR-2277-3p  | 2 | 702463 | 4 | 501739 | 4 | 702461 | 2 | 501741 | 0,8190 |
| miR-24-1*    | 2 | 702463 | 4 | 501739 | 4 | 702461 | 2 | 501741 | 0,8190 |
| miR-2861     | 2 | 702463 | 4 | 501739 | 4 | 702461 | 2 | 501741 | 0,8190 |
| miR-2909     | 2 | 702463 | 4 | 501739 | 4 | 702461 | 2 | 501741 | 0,8190 |
| miR-297      | 2 | 702463 | 4 | 501739 | 4 | 702461 | 2 | 501741 | 0,8190 |
| miR-298      | 2 | 702463 | 4 | 501739 | 4 | 702461 | 2 | 501741 | 0,8190 |
| miR-300      | 2 | 702463 | 4 | 501739 | 4 | 702461 | 2 | 501741 | 0,8190 |
| miR-302e     | 2 | 702463 | 4 | 501739 | 4 | 702461 | 2 | 501741 | 0,8190 |
| miR-302f     | 2 | 702463 | 4 | 501739 | 4 | 702461 | 2 | 501741 | 0,8190 |
| miR-3074     | 2 | 702463 | 4 | 501739 | 4 | 702461 | 2 | 501741 | 0,8190 |

|             |   |        |   |        |   |        |   |        |        |
|-------------|---|--------|---|--------|---|--------|---|--------|--------|
| miR-3115    | 2 | 702463 | 4 | 501739 | 4 | 702461 | 2 | 501741 | 0,8190 |
| miR-3116    | 2 | 702463 | 4 | 501739 | 4 | 702461 | 2 | 501741 | 0,8190 |
| miR-3119    | 2 | 702463 | 4 | 501739 | 4 | 702461 | 2 | 501741 | 0,8190 |
| miR-3121    | 2 | 702463 | 4 | 501739 | 4 | 702461 | 2 | 501741 | 0,8190 |
| miR-3122    | 2 | 702463 | 4 | 501739 | 4 | 702461 | 2 | 501741 | 0,8190 |
| miR-3123    | 2 | 702463 | 4 | 501739 | 4 | 702461 | 2 | 501741 | 0,8190 |
| miR-3124    | 2 | 702463 | 4 | 501739 | 4 | 702461 | 2 | 501741 | 0,8190 |
| miR-3126-3p | 2 | 702463 | 4 | 501739 | 4 | 702461 | 2 | 501741 | 0,8190 |
| miR-3126-5p | 2 | 702463 | 4 | 501739 | 4 | 702461 | 2 | 501741 | 0,8190 |
| miR-3127    | 2 | 702463 | 4 | 501739 | 4 | 702461 | 2 | 501741 | 0,8190 |
| miR-3128    | 2 | 702463 | 4 | 501739 | 4 | 702461 | 2 | 501741 | 0,8190 |
| miR-3131    | 2 | 702463 | 4 | 501739 | 4 | 702461 | 2 | 501741 | 0,8190 |
| miR-3132    | 2 | 702463 | 4 | 501739 | 4 | 702461 | 2 | 501741 | 0,8190 |
| miR-3134    | 2 | 702463 | 4 | 501739 | 4 | 702461 | 2 | 501741 | 0,8190 |
| miR-3135    | 2 | 702463 | 4 | 501739 | 4 | 702461 | 2 | 501741 | 0,8190 |
| miR-3136    | 2 | 702463 | 4 | 501739 | 4 | 702461 | 2 | 501741 | 0,8190 |
| miR-3137    | 2 | 702463 | 4 | 501739 | 4 | 702461 | 2 | 501741 | 0,8190 |
| miR-3138    | 2 | 702463 | 4 | 501739 | 4 | 702461 | 2 | 501741 | 0,8190 |
| miR-3139    | 2 | 702463 | 4 | 501739 | 4 | 702461 | 2 | 501741 | 0,8190 |
| miR-3140    | 2 | 702463 | 4 | 501739 | 4 | 702461 | 2 | 501741 | 0,8190 |
| miR-3141    | 2 | 702463 | 4 | 501739 | 4 | 702461 | 2 | 501741 | 0,8190 |
| miR-3142    | 2 | 702463 | 4 | 501739 | 4 | 702461 | 2 | 501741 | 0,8190 |
| miR-3144-3p | 2 | 702463 | 4 | 501739 | 4 | 702461 | 2 | 501741 | 0,8190 |
| miR-3144-5p | 2 | 702463 | 4 | 501739 | 4 | 702461 | 2 | 501741 | 0,8190 |
| miR-3145    | 2 | 702463 | 4 | 501739 | 4 | 702461 | 2 | 501741 | 0,8190 |
| miR-3146    | 2 | 702463 | 4 | 501739 | 4 | 702461 | 2 | 501741 | 0,8190 |
| miR-3147    | 2 | 702463 | 4 | 501739 | 4 | 702461 | 2 | 501741 | 0,8190 |
| miR-3149    | 2 | 702463 | 4 | 501739 | 4 | 702461 | 2 | 501741 | 0,8190 |
| miR-3150    | 2 | 702463 | 4 | 501739 | 4 | 702461 | 2 | 501741 | 0,8190 |
| miR-3150b   | 2 | 702463 | 4 | 501739 | 4 | 702461 | 2 | 501741 | 0,8190 |

|             |   |        |   |        |   |        |   |        |        |
|-------------|---|--------|---|--------|---|--------|---|--------|--------|
| miR-3152    | 2 | 702463 | 4 | 501739 | 4 | 702461 | 2 | 501741 | 0,8190 |
| miR-3153    | 2 | 702463 | 4 | 501739 | 4 | 702461 | 2 | 501741 | 0,8190 |
| miR-3155    | 2 | 702463 | 4 | 501739 | 4 | 702461 | 2 | 501741 | 0,8190 |
| miR-3157    | 2 | 702463 | 4 | 501739 | 4 | 702461 | 2 | 501741 | 0,8190 |
| miR-3159    | 2 | 702463 | 4 | 501739 | 4 | 702461 | 2 | 501741 | 0,8190 |
| miR-3161    | 2 | 702463 | 4 | 501739 | 4 | 702461 | 2 | 501741 | 0,8190 |
| miR-3162    | 2 | 702463 | 4 | 501739 | 4 | 702461 | 2 | 501741 | 0,8190 |
| miR-3164    | 2 | 702463 | 4 | 501739 | 4 | 702461 | 2 | 501741 | 0,8190 |
| miR-3165    | 2 | 702463 | 4 | 501739 | 4 | 702461 | 2 | 501741 | 0,8190 |
| miR-3167    | 2 | 702463 | 4 | 501739 | 4 | 702461 | 2 | 501741 | 0,8190 |
| miR-3168    | 2 | 702463 | 4 | 501739 | 4 | 702461 | 2 | 501741 | 0,8190 |
| miR-3169    | 2 | 702463 | 4 | 501739 | 4 | 702461 | 2 | 501741 | 0,8190 |
| miR-3170    | 2 | 702463 | 4 | 501739 | 4 | 702461 | 2 | 501741 | 0,8190 |
| miR-3171    | 2 | 702463 | 4 | 501739 | 4 | 702461 | 2 | 501741 | 0,8190 |
| miR-3173    | 2 | 702463 | 4 | 501739 | 4 | 702461 | 2 | 501741 | 0,8190 |
| miR-3174    | 2 | 702463 | 4 | 501739 | 4 | 702461 | 2 | 501741 | 0,8190 |
| miR-3176    | 2 | 702463 | 4 | 501739 | 4 | 702461 | 2 | 501741 | 0,8190 |
| miR-3178    | 2 | 702463 | 4 | 501739 | 4 | 702461 | 2 | 501741 | 0,8190 |
| miR-3181    | 2 | 702463 | 4 | 501739 | 4 | 702461 | 2 | 501741 | 0,8190 |
| miR-3182    | 2 | 702463 | 4 | 501739 | 4 | 702461 | 2 | 501741 | 0,8190 |
| miR-3183    | 2 | 702463 | 4 | 501739 | 4 | 702461 | 2 | 501741 | 0,8190 |
| miR-3185    | 2 | 702463 | 4 | 501739 | 4 | 702461 | 2 | 501741 | 0,8190 |
| miR-3186-3p | 2 | 702463 | 4 | 501739 | 4 | 702461 | 2 | 501741 | 0,8190 |
| miR-3186-5p | 2 | 702463 | 4 | 501739 | 4 | 702461 | 2 | 501741 | 0,8190 |
| miR-3187    | 2 | 702463 | 4 | 501739 | 4 | 702461 | 2 | 501741 | 0,8190 |
| miR-3188    | 2 | 702463 | 4 | 501739 | 4 | 702461 | 2 | 501741 | 0,8190 |
| miR-3189    | 2 | 702463 | 4 | 501739 | 4 | 702461 | 2 | 501741 | 0,8190 |
| miR-3191    | 2 | 702463 | 4 | 501739 | 4 | 702461 | 2 | 501741 | 0,8190 |
| miR-3193    | 2 | 702463 | 4 | 501739 | 4 | 702461 | 2 | 501741 | 0,8190 |
| miR-3194    | 2 | 702463 | 4 | 501739 | 4 | 702461 | 2 | 501741 | 0,8190 |



|             |   |        |   |        |   |        |   |        |        |
|-------------|---|--------|---|--------|---|--------|---|--------|--------|
| miR-3195    | 2 | 702463 | 4 | 501739 | 4 | 702461 | 2 | 501741 | 0,8190 |
| miR-3196    | 2 | 702463 | 4 | 501739 | 4 | 702461 | 2 | 501741 | 0,8190 |
| miR-3197    | 2 | 702463 | 4 | 501739 | 4 | 702461 | 2 | 501741 | 0,8190 |
| miR-3198    | 2 | 702463 | 4 | 501739 | 4 | 702461 | 2 | 501741 | 0,8190 |
| miR-3201    | 2 | 702463 | 4 | 501739 | 4 | 702461 | 2 | 501741 | 0,8190 |
| miR-3202    | 2 | 702463 | 4 | 501739 | 4 | 702461 | 2 | 501741 | 0,8190 |
| miR-320d    | 2 | 702463 | 4 | 501739 | 4 | 702461 | 2 | 501741 | 0,8190 |
| miR-320e    | 2 | 702463 | 4 | 501739 | 4 | 702461 | 2 | 501741 | 0,8190 |
| miR-323-5p  | 2 | 702463 | 4 | 501739 | 4 | 702461 | 2 | 501741 | 0,8190 |
| miR-325     | 2 | 702463 | 4 | 501739 | 4 | 702461 | 2 | 501741 | 0,8190 |
| miR-346     | 2 | 702463 | 4 | 501739 | 4 | 702461 | 2 | 501741 | 0,8190 |
| miR-3607-3p | 2 | 702463 | 4 | 501739 | 4 | 702461 | 2 | 501741 | 0,8190 |
| miR-3610    | 2 | 702463 | 4 | 501739 | 4 | 702461 | 2 | 501741 | 0,8190 |
| miR-3616-5p | 2 | 702463 | 4 | 501739 | 4 | 702461 | 2 | 501741 | 0,8190 |
| miR-3617    | 2 | 702463 | 4 | 501739 | 4 | 702461 | 2 | 501741 | 0,8190 |
| miR-3618    | 2 | 702463 | 4 | 501739 | 4 | 702461 | 2 | 501741 | 0,8190 |
| miR-3619    | 2 | 702463 | 4 | 501739 | 4 | 702461 | 2 | 501741 | 0,8190 |
| miR-3646    | 2 | 702463 | 4 | 501739 | 4 | 702461 | 2 | 501741 | 0,8190 |
| miR-3647-3p | 2 | 702463 | 4 | 501739 | 4 | 702461 | 2 | 501741 | 0,8190 |
| miR-3648    | 2 | 702463 | 4 | 501739 | 4 | 702461 | 2 | 501741 | 0,8190 |
| miR-3649    | 2 | 702463 | 4 | 501739 | 4 | 702461 | 2 | 501741 | 0,8190 |
| miR-3650    | 2 | 702463 | 4 | 501739 | 4 | 702461 | 2 | 501741 | 0,8190 |
| miR-3651    | 2 | 702463 | 4 | 501739 | 4 | 702461 | 2 | 501741 | 0,8190 |
| miR-3652    | 2 | 702463 | 4 | 501739 | 4 | 702461 | 2 | 501741 | 0,8190 |
| miR-3653    | 2 | 702463 | 4 | 501739 | 4 | 702461 | 2 | 501741 | 0,8190 |
| miR-3654    | 2 | 702463 | 4 | 501739 | 4 | 702461 | 2 | 501741 | 0,8190 |
| miR-3655    | 2 | 702463 | 4 | 501739 | 4 | 702461 | 2 | 501741 | 0,8190 |
| miR-3656    | 2 | 702463 | 4 | 501739 | 4 | 702461 | 2 | 501741 | 0,8190 |
| miR-3657    | 2 | 702463 | 4 | 501739 | 4 | 702461 | 2 | 501741 | 0,8190 |
| miR-3658    | 2 | 702463 | 4 | 501739 | 4 | 702461 | 2 | 501741 | 0,8190 |

|              |   |        |   |        |   |        |   |        |        |
|--------------|---|--------|---|--------|---|--------|---|--------|--------|
| miR-3659     | 2 | 702463 | 4 | 501739 | 4 | 702461 | 2 | 501741 | 0,8190 |
| miR-3662     | 2 | 702463 | 4 | 501739 | 4 | 702461 | 2 | 501741 | 0,8190 |
| miR-3663-5p  | 2 | 702463 | 4 | 501739 | 4 | 702461 | 2 | 501741 | 0,8190 |
| miR-3664     | 2 | 702463 | 4 | 501739 | 4 | 702461 | 2 | 501741 | 0,8190 |
| miR-3665     | 2 | 702463 | 4 | 501739 | 4 | 702461 | 2 | 501741 | 0,8190 |
| miR-3666     | 2 | 702463 | 4 | 501739 | 4 | 702461 | 2 | 501741 | 0,8190 |
| miR-3668     | 2 | 702463 | 4 | 501739 | 4 | 702461 | 2 | 501741 | 0,8190 |
| miR-3669     | 2 | 702463 | 4 | 501739 | 4 | 702461 | 2 | 501741 | 0,8190 |
| miR-3670     | 2 | 702463 | 4 | 501739 | 4 | 702461 | 2 | 501741 | 0,8190 |
| miR-3671     | 2 | 702463 | 4 | 501739 | 4 | 702461 | 2 | 501741 | 0,8190 |
| miR-3672     | 2 | 702463 | 4 | 501739 | 4 | 702461 | 2 | 501741 | 0,8190 |
| miR-3673     | 2 | 702463 | 4 | 501739 | 4 | 702461 | 2 | 501741 | 0,8190 |
| miR-3674     | 2 | 702463 | 4 | 501739 | 4 | 702461 | 2 | 501741 | 0,8190 |
| miR-3675-3p  | 2 | 702463 | 4 | 501739 | 4 | 702461 | 2 | 501741 | 0,8190 |
| miR-3675-5p  | 2 | 702463 | 4 | 501739 | 4 | 702461 | 2 | 501741 | 0,8190 |
| miR-3677     | 2 | 702463 | 4 | 501739 | 4 | 702461 | 2 | 501741 | 0,8190 |
| miR-3678-3p  | 2 | 702463 | 4 | 501739 | 4 | 702461 | 2 | 501741 | 0,8190 |
| miR-3678-5p  | 2 | 702463 | 4 | 501739 | 4 | 702461 | 2 | 501741 | 0,8190 |
| miR-3679-3p  | 2 | 702463 | 4 | 501739 | 4 | 702461 | 2 | 501741 | 0,8190 |
| miR-3680     | 2 | 702463 | 4 | 501739 | 4 | 702461 | 2 | 501741 | 0,8190 |
| miR-3680*    | 2 | 702463 | 4 | 501739 | 4 | 702461 | 2 | 501741 | 0,8190 |
| miR-3681     | 2 | 702463 | 4 | 501739 | 4 | 702461 | 2 | 501741 | 0,8190 |
| miR-3681*    | 2 | 702463 | 4 | 501739 | 4 | 702461 | 2 | 501741 | 0,8190 |
| miR-3682     | 2 | 702463 | 4 | 501739 | 4 | 702461 | 2 | 501741 | 0,8190 |
| miR-3683     | 2 | 702463 | 4 | 501739 | 4 | 702461 | 2 | 501741 | 0,8190 |
| miR-3685     | 2 | 702463 | 4 | 501739 | 4 | 702461 | 2 | 501741 | 0,8190 |
| miR-3686     | 2 | 702463 | 4 | 501739 | 4 | 702461 | 2 | 501741 | 0,8190 |
| miR-3689a-3p | 2 | 702463 | 4 | 501739 | 4 | 702461 | 2 | 501741 | 0,8190 |
| miR-3689b*   | 2 | 702463 | 4 | 501739 | 4 | 702461 | 2 | 501741 | 0,8190 |
| miR-3690     | 2 | 702463 | 4 | 501739 | 4 | 702461 | 2 | 501741 | 0,8190 |

|          |   |        |   |        |   |        |   |        |        |
|----------|---|--------|---|--------|---|--------|---|--------|--------|
| miR-3691 | 2 | 702463 | 4 | 501739 | 4 | 702461 | 2 | 501741 | 0,8190 |
| miR-3692 | 2 | 702463 | 4 | 501739 | 4 | 702461 | 2 | 501741 | 0,8190 |
| miR-3713 | 2 | 702463 | 4 | 501739 | 4 | 702461 | 2 | 501741 | 0,8190 |
| miR-3714 | 2 | 702463 | 4 | 501739 | 4 | 702461 | 2 | 501741 | 0,8190 |
| miR-378b | 2 | 702463 | 4 | 501739 | 4 | 702461 | 2 | 501741 | 0,8190 |
| miR-384  | 2 | 702463 | 4 | 501739 | 4 | 702461 | 2 | 501741 | 0,8190 |
| miR-3907 | 2 | 702463 | 4 | 501739 | 4 | 702461 | 2 | 501741 | 0,8190 |
| miR-3908 | 2 | 702463 | 4 | 501739 | 4 | 702461 | 2 | 501741 | 0,8190 |
| miR-3909 | 2 | 702463 | 4 | 501739 | 4 | 702461 | 2 | 501741 | 0,8190 |
| miR-3911 | 2 | 702463 | 4 | 501739 | 4 | 702461 | 2 | 501741 | 0,8190 |
| miR-3912 | 2 | 702463 | 4 | 501739 | 4 | 702461 | 2 | 501741 | 0,8190 |
| miR-3914 | 2 | 702463 | 4 | 501739 | 4 | 702461 | 2 | 501741 | 0,8190 |
| miR-3917 | 2 | 702463 | 4 | 501739 | 4 | 702461 | 2 | 501741 | 0,8190 |
| miR-3918 | 2 | 702463 | 4 | 501739 | 4 | 702461 | 2 | 501741 | 0,8190 |
| miR-3919 | 2 | 702463 | 4 | 501739 | 4 | 702461 | 2 | 501741 | 0,8190 |
| miR-3920 | 2 | 702463 | 4 | 501739 | 4 | 702461 | 2 | 501741 | 0,8190 |
| miR-3921 | 2 | 702463 | 4 | 501739 | 4 | 702461 | 2 | 501741 | 0,8190 |
| miR-3922 | 2 | 702463 | 4 | 501739 | 4 | 702461 | 2 | 501741 | 0,8190 |
| miR-3923 | 2 | 702463 | 4 | 501739 | 4 | 702461 | 2 | 501741 | 0,8190 |
| miR-3924 | 2 | 702463 | 4 | 501739 | 4 | 702461 | 2 | 501741 | 0,8190 |
| miR-3925 | 2 | 702463 | 4 | 501739 | 4 | 702461 | 2 | 501741 | 0,8190 |
| miR-3926 | 2 | 702463 | 4 | 501739 | 4 | 702461 | 2 | 501741 | 0,8190 |
| miR-3927 | 2 | 702463 | 4 | 501739 | 4 | 702461 | 2 | 501741 | 0,8190 |
| miR-3928 | 2 | 702463 | 4 | 501739 | 4 | 702461 | 2 | 501741 | 0,8190 |
| miR-3929 | 2 | 702463 | 4 | 501739 | 4 | 702461 | 2 | 501741 | 0,8190 |
| miR-3934 | 2 | 702463 | 4 | 501739 | 4 | 702461 | 2 | 501741 | 0,8190 |
| miR-3935 | 2 | 702463 | 4 | 501739 | 4 | 702461 | 2 | 501741 | 0,8190 |
| miR-3937 | 2 | 702463 | 4 | 501739 | 4 | 702461 | 2 | 501741 | 0,8190 |
| miR-3938 | 2 | 702463 | 4 | 501739 | 4 | 702461 | 2 | 501741 | 0,8190 |
| miR-3939 | 2 | 702463 | 4 | 501739 | 4 | 702461 | 2 | 501741 | 0,8190 |

|          |   |        |   |        |   |        |   |        |        |
|----------|---|--------|---|--------|---|--------|---|--------|--------|
| miR-3941 | 2 | 702463 | 4 | 501739 | 4 | 702461 | 2 | 501741 | 0,8190 |
| miR-3942 | 2 | 702463 | 4 | 501739 | 4 | 702461 | 2 | 501741 | 0,8190 |
| miR-3943 | 2 | 702463 | 4 | 501739 | 4 | 702461 | 2 | 501741 | 0,8190 |
| miR-3945 | 2 | 702463 | 4 | 501739 | 4 | 702461 | 2 | 501741 | 0,8190 |
| miR-4251 | 2 | 702463 | 4 | 501739 | 4 | 702461 | 2 | 501741 | 0,8190 |
| miR-4252 | 2 | 702463 | 4 | 501739 | 4 | 702461 | 2 | 501741 | 0,8190 |
| miR-4253 | 2 | 702463 | 4 | 501739 | 4 | 702461 | 2 | 501741 | 0,8190 |
| miR-4254 | 2 | 702463 | 4 | 501739 | 4 | 702461 | 2 | 501741 | 0,8190 |
| miR-4255 | 2 | 702463 | 4 | 501739 | 4 | 702461 | 2 | 501741 | 0,8190 |
| miR-4256 | 2 | 702463 | 4 | 501739 | 4 | 702461 | 2 | 501741 | 0,8190 |
| miR-4257 | 2 | 702463 | 4 | 501739 | 4 | 702461 | 2 | 501741 | 0,8190 |
| miR-4258 | 2 | 702463 | 4 | 501739 | 4 | 702461 | 2 | 501741 | 0,8190 |
| miR-4259 | 2 | 702463 | 4 | 501739 | 4 | 702461 | 2 | 501741 | 0,8190 |
| miR-4260 | 2 | 702463 | 4 | 501739 | 4 | 702461 | 2 | 501741 | 0,8190 |
| miR-4261 | 2 | 702463 | 4 | 501739 | 4 | 702461 | 2 | 501741 | 0,8190 |
| miR-4262 | 2 | 702463 | 4 | 501739 | 4 | 702461 | 2 | 501741 | 0,8190 |
| miR-4263 | 2 | 702463 | 4 | 501739 | 4 | 702461 | 2 | 501741 | 0,8190 |
| miR-4264 | 2 | 702463 | 4 | 501739 | 4 | 702461 | 2 | 501741 | 0,8190 |
| miR-4265 | 2 | 702463 | 4 | 501739 | 4 | 702461 | 2 | 501741 | 0,8190 |
| miR-4266 | 2 | 702463 | 4 | 501739 | 4 | 702461 | 2 | 501741 | 0,8190 |
| miR-4267 | 2 | 702463 | 4 | 501739 | 4 | 702461 | 2 | 501741 | 0,8190 |
| miR-4268 | 2 | 702463 | 4 | 501739 | 4 | 702461 | 2 | 501741 | 0,8190 |
| miR-4269 | 2 | 702463 | 4 | 501739 | 4 | 702461 | 2 | 501741 | 0,8190 |
| miR-4270 | 2 | 702463 | 4 | 501739 | 4 | 702461 | 2 | 501741 | 0,8190 |
| miR-4271 | 2 | 702463 | 4 | 501739 | 4 | 702461 | 2 | 501741 | 0,8190 |
| miR-4272 | 2 | 702463 | 4 | 501739 | 4 | 702461 | 2 | 501741 | 0,8190 |
| miR-4273 | 2 | 702463 | 4 | 501739 | 4 | 702461 | 2 | 501741 | 0,8190 |
| miR-4274 | 2 | 702463 | 4 | 501739 | 4 | 702461 | 2 | 501741 | 0,8190 |
| miR-4275 | 2 | 702463 | 4 | 501739 | 4 | 702461 | 2 | 501741 | 0,8190 |
| miR-4276 | 2 | 702463 | 4 | 501739 | 4 | 702461 | 2 | 501741 | 0,8190 |

|          |   |        |   |        |   |        |   |        |        |
|----------|---|--------|---|--------|---|--------|---|--------|--------|
| miR-4277 | 2 | 702463 | 4 | 501739 | 4 | 702461 | 2 | 501741 | 0,8190 |
| miR-4278 | 2 | 702463 | 4 | 501739 | 4 | 702461 | 2 | 501741 | 0,8190 |
| miR-4279 | 2 | 702463 | 4 | 501739 | 4 | 702461 | 2 | 501741 | 0,8190 |
| miR-4280 | 2 | 702463 | 4 | 501739 | 4 | 702461 | 2 | 501741 | 0,8190 |
| miR-4281 | 2 | 702463 | 4 | 501739 | 4 | 702461 | 2 | 501741 | 0,8190 |
| miR-4282 | 2 | 702463 | 4 | 501739 | 4 | 702461 | 2 | 501741 | 0,8190 |
| miR-4283 | 2 | 702463 | 4 | 501739 | 4 | 702461 | 2 | 501741 | 0,8190 |
| miR-4284 | 2 | 702463 | 4 | 501739 | 4 | 702461 | 2 | 501741 | 0,8190 |
| miR-4285 | 2 | 702463 | 4 | 501739 | 4 | 702461 | 2 | 501741 | 0,8190 |
| miR-4286 | 2 | 702463 | 4 | 501739 | 4 | 702461 | 2 | 501741 | 0,8190 |
| miR-4287 | 2 | 702463 | 4 | 501739 | 4 | 702461 | 2 | 501741 | 0,8190 |
| miR-4288 | 2 | 702463 | 4 | 501739 | 4 | 702461 | 2 | 501741 | 0,8190 |
| miR-4289 | 2 | 702463 | 4 | 501739 | 4 | 702461 | 2 | 501741 | 0,8190 |
| miR-4290 | 2 | 702463 | 4 | 501739 | 4 | 702461 | 2 | 501741 | 0,8190 |
| miR-4291 | 2 | 702463 | 4 | 501739 | 4 | 702461 | 2 | 501741 | 0,8190 |
| miR-4292 | 2 | 702463 | 4 | 501739 | 4 | 702461 | 2 | 501741 | 0,8190 |
| miR-4293 | 2 | 702463 | 4 | 501739 | 4 | 702461 | 2 | 501741 | 0,8190 |
| miR-4294 | 2 | 702463 | 4 | 501739 | 4 | 702461 | 2 | 501741 | 0,8190 |
| miR-4295 | 2 | 702463 | 4 | 501739 | 4 | 702461 | 2 | 501741 | 0,8190 |
| miR-4296 | 2 | 702463 | 4 | 501739 | 4 | 702461 | 2 | 501741 | 0,8190 |
| miR-4297 | 2 | 702463 | 4 | 501739 | 4 | 702461 | 2 | 501741 | 0,8190 |
| miR-4298 | 2 | 702463 | 4 | 501739 | 4 | 702461 | 2 | 501741 | 0,8190 |
| miR-4299 | 2 | 702463 | 4 | 501739 | 4 | 702461 | 2 | 501741 | 0,8190 |
| miR-4300 | 2 | 702463 | 4 | 501739 | 4 | 702461 | 2 | 501741 | 0,8190 |
| miR-4301 | 2 | 702463 | 4 | 501739 | 4 | 702461 | 2 | 501741 | 0,8190 |
| miR-4302 | 2 | 702463 | 4 | 501739 | 4 | 702461 | 2 | 501741 | 0,8190 |
| miR-4303 | 2 | 702463 | 4 | 501739 | 4 | 702461 | 2 | 501741 | 0,8190 |
| miR-4304 | 2 | 702463 | 4 | 501739 | 4 | 702461 | 2 | 501741 | 0,8190 |
| miR-4305 | 2 | 702463 | 4 | 501739 | 4 | 702461 | 2 | 501741 | 0,8190 |
| miR-4306 | 2 | 702463 | 4 | 501739 | 4 | 702461 | 2 | 501741 | 0,8190 |

|            |   |        |   |        |   |        |   |        |        |
|------------|---|--------|---|--------|---|--------|---|--------|--------|
| miR-4307   | 2 | 702463 | 4 | 501739 | 4 | 702461 | 2 | 501741 | 0,8190 |
| miR-4308   | 2 | 702463 | 4 | 501739 | 4 | 702461 | 2 | 501741 | 0,8190 |
| miR-4309   | 2 | 702463 | 4 | 501739 | 4 | 702461 | 2 | 501741 | 0,8190 |
| miR-4310   | 2 | 702463 | 4 | 501739 | 4 | 702461 | 2 | 501741 | 0,8190 |
| miR-4311   | 2 | 702463 | 4 | 501739 | 4 | 702461 | 2 | 501741 | 0,8190 |
| miR-4312   | 2 | 702463 | 4 | 501739 | 4 | 702461 | 2 | 501741 | 0,8190 |
| miR-4313   | 2 | 702463 | 4 | 501739 | 4 | 702461 | 2 | 501741 | 0,8190 |
| miR-4314   | 2 | 702463 | 4 | 501739 | 4 | 702461 | 2 | 501741 | 0,8190 |
| miR-4315   | 2 | 702463 | 4 | 501739 | 4 | 702461 | 2 | 501741 | 0,8190 |
| miR-4316   | 2 | 702463 | 4 | 501739 | 4 | 702461 | 2 | 501741 | 0,8190 |
| miR-4317   | 2 | 702463 | 4 | 501739 | 4 | 702461 | 2 | 501741 | 0,8190 |
| miR-4318   | 2 | 702463 | 4 | 501739 | 4 | 702461 | 2 | 501741 | 0,8190 |
| miR-4319   | 2 | 702463 | 4 | 501739 | 4 | 702461 | 2 | 501741 | 0,8190 |
| miR-4320   | 2 | 702463 | 4 | 501739 | 4 | 702461 | 2 | 501741 | 0,8190 |
| miR-4321   | 2 | 702463 | 4 | 501739 | 4 | 702461 | 2 | 501741 | 0,8190 |
| miR-4322   | 2 | 702463 | 4 | 501739 | 4 | 702461 | 2 | 501741 | 0,8190 |
| miR-4323   | 2 | 702463 | 4 | 501739 | 4 | 702461 | 2 | 501741 | 0,8190 |
| miR-4324   | 2 | 702463 | 4 | 501739 | 4 | 702461 | 2 | 501741 | 0,8190 |
| miR-4325   | 2 | 702463 | 4 | 501739 | 4 | 702461 | 2 | 501741 | 0,8190 |
| miR-4327   | 2 | 702463 | 4 | 501739 | 4 | 702461 | 2 | 501741 | 0,8190 |
| miR-4328   | 2 | 702463 | 4 | 501739 | 4 | 702461 | 2 | 501741 | 0,8190 |
| miR-4329   | 2 | 702463 | 4 | 501739 | 4 | 702461 | 2 | 501741 | 0,8190 |
| miR-4330   | 2 | 702463 | 4 | 501739 | 4 | 702461 | 2 | 501741 | 0,8190 |
| miR-448    | 2 | 702463 | 4 | 501739 | 4 | 702461 | 2 | 501741 | 0,8190 |
| miR-449b   | 2 | 702463 | 4 | 501739 | 4 | 702461 | 2 | 501741 | 0,8190 |
| miR-449b*  | 2 | 702463 | 4 | 501739 | 4 | 702461 | 2 | 501741 | 0,8190 |
| miR-449c   | 2 | 702463 | 4 | 501739 | 4 | 702461 | 2 | 501741 | 0,8190 |
| miR-449c*  | 2 | 702463 | 4 | 501739 | 4 | 702461 | 2 | 501741 | 0,8190 |
| miR-452*   | 2 | 702463 | 4 | 501739 | 4 | 702461 | 2 | 501741 | 0,8190 |
| miR-490-3p | 2 | 702463 | 4 | 501739 | 4 | 702461 | 2 | 501741 | 0,8190 |

|             |   |        |   |        |   |        |   |        |        |
|-------------|---|--------|---|--------|---|--------|---|--------|--------|
| miR-490-5p  | 2 | 702463 | 4 | 501739 | 4 | 702461 | 2 | 501741 | 0,8190 |
| miR-492     | 2 | 702463 | 4 | 501739 | 4 | 702461 | 2 | 501741 | 0,8190 |
| miR-513a-5p | 2 | 702463 | 4 | 501739 | 4 | 702461 | 2 | 501741 | 0,8190 |
| miR-541     | 2 | 702463 | 4 | 501739 | 4 | 702461 | 2 | 501741 | 0,8190 |
| miR-544b    | 2 | 702463 | 4 | 501739 | 4 | 702461 | 2 | 501741 | 0,8190 |
| miR-548f    | 2 | 702463 | 4 | 501739 | 4 | 702461 | 2 | 501741 | 0,8190 |
| miR-548h    | 2 | 702463 | 4 | 501739 | 4 | 702461 | 2 | 501741 | 0,8190 |
| miR-548l    | 2 | 702463 | 4 | 501739 | 4 | 702461 | 2 | 501741 | 0,8190 |
| miR-548s    | 2 | 702463 | 4 | 501739 | 4 | 702461 | 2 | 501741 | 0,8190 |
| miR-548t    | 2 | 702463 | 4 | 501739 | 4 | 702461 | 2 | 501741 | 0,8190 |
| miR-548u    | 2 | 702463 | 4 | 501739 | 4 | 702461 | 2 | 501741 | 0,8190 |
| miR-548v    | 2 | 702463 | 4 | 501739 | 4 | 702461 | 2 | 501741 | 0,8190 |
| miR-550b    | 2 | 702463 | 4 | 501739 | 4 | 702461 | 2 | 501741 | 0,8190 |
| miR-551b*   | 2 | 702463 | 4 | 501739 | 4 | 702461 | 2 | 501741 | 0,8190 |
| miR-553     | 2 | 702463 | 4 | 501739 | 4 | 702461 | 2 | 501741 | 0,8190 |
| miR-554     | 2 | 702463 | 4 | 501739 | 4 | 702461 | 2 | 501741 | 0,8190 |
| miR-555     | 2 | 702463 | 4 | 501739 | 4 | 702461 | 2 | 501741 | 0,8190 |
| miR-556-3p  | 2 | 702463 | 4 | 501739 | 4 | 702461 | 2 | 501741 | 0,8190 |
| miR-557     | 2 | 702463 | 4 | 501739 | 4 | 702461 | 2 | 501741 | 0,8190 |
| miR-558     | 2 | 702463 | 4 | 501739 | 4 | 702461 | 2 | 501741 | 0,8190 |
| miR-562     | 2 | 702463 | 4 | 501739 | 4 | 702461 | 2 | 501741 | 0,8190 |
| miR-563     | 2 | 702463 | 4 | 501739 | 4 | 702461 | 2 | 501741 | 0,8190 |
| miR-564     | 2 | 702463 | 4 | 501739 | 4 | 702461 | 2 | 501741 | 0,8190 |
| miR-566     | 2 | 702463 | 4 | 501739 | 4 | 702461 | 2 | 501741 | 0,8190 |
| miR-567     | 2 | 702463 | 4 | 501739 | 4 | 702461 | 2 | 501741 | 0,8190 |
| miR-568     | 2 | 702463 | 4 | 501739 | 4 | 702461 | 2 | 501741 | 0,8190 |
| miR-569     | 2 | 702463 | 4 | 501739 | 4 | 702461 | 2 | 501741 | 0,8190 |
| miR-571     | 2 | 702463 | 4 | 501739 | 4 | 702461 | 2 | 501741 | 0,8190 |
| miR-572     | 2 | 702463 | 4 | 501739 | 4 | 702461 | 2 | 501741 | 0,8190 |
| miR-573     | 2 | 702463 | 4 | 501739 | 4 | 702461 | 2 | 501741 | 0,8190 |

|          |   |        |   |        |   |        |   |        |        |
|----------|---|--------|---|--------|---|--------|---|--------|--------|
| miR-575  | 2 | 702463 | 4 | 501739 | 4 | 702461 | 2 | 501741 | 0,8190 |
| miR-577  | 2 | 702463 | 4 | 501739 | 4 | 702461 | 2 | 501741 | 0,8190 |
| miR-578  | 2 | 702463 | 4 | 501739 | 4 | 702461 | 2 | 501741 | 0,8190 |
| miR-580  | 2 | 702463 | 4 | 501739 | 4 | 702461 | 2 | 501741 | 0,8190 |
| miR-581  | 2 | 702463 | 4 | 501739 | 4 | 702461 | 2 | 501741 | 0,8190 |
| miR-583  | 2 | 702463 | 4 | 501739 | 4 | 702461 | 2 | 501741 | 0,8190 |
| miR-585  | 2 | 702463 | 4 | 501739 | 4 | 702461 | 2 | 501741 | 0,8190 |
| miR-586  | 2 | 702463 | 4 | 501739 | 4 | 702461 | 2 | 501741 | 0,8190 |
| miR-587  | 2 | 702463 | 4 | 501739 | 4 | 702461 | 2 | 501741 | 0,8190 |
| miR-588  | 2 | 702463 | 4 | 501739 | 4 | 702461 | 2 | 501741 | 0,8190 |
| miR-591  | 2 | 702463 | 4 | 501739 | 4 | 702461 | 2 | 501741 | 0,8190 |
| miR-593  | 2 | 702463 | 4 | 501739 | 4 | 702461 | 2 | 501741 | 0,8190 |
| miR-593* | 2 | 702463 | 4 | 501739 | 4 | 702461 | 2 | 501741 | 0,8190 |
| miR-595  | 2 | 702463 | 4 | 501739 | 4 | 702461 | 2 | 501741 | 0,8190 |
| miR-596  | 2 | 702463 | 4 | 501739 | 4 | 702461 | 2 | 501741 | 0,8190 |
| miR-597  | 2 | 702463 | 4 | 501739 | 4 | 702461 | 2 | 501741 | 0,8190 |
| miR-599  | 2 | 702463 | 4 | 501739 | 4 | 702461 | 2 | 501741 | 0,8190 |
| miR-600  | 2 | 702463 | 4 | 501739 | 4 | 702461 | 2 | 501741 | 0,8190 |
| miR-601  | 2 | 702463 | 4 | 501739 | 4 | 702461 | 2 | 501741 | 0,8190 |
| miR-602  | 2 | 702463 | 4 | 501739 | 4 | 702461 | 2 | 501741 | 0,8190 |
| miR-603  | 2 | 702463 | 4 | 501739 | 4 | 702461 | 2 | 501741 | 0,8190 |
| miR-604  | 2 | 702463 | 4 | 501739 | 4 | 702461 | 2 | 501741 | 0,8190 |
| miR-605  | 2 | 702463 | 4 | 501739 | 4 | 702461 | 2 | 501741 | 0,8190 |
| miR-606  | 2 | 702463 | 4 | 501739 | 4 | 702461 | 2 | 501741 | 0,8190 |
| miR-607  | 2 | 702463 | 4 | 501739 | 4 | 702461 | 2 | 501741 | 0,8190 |
| miR-608  | 2 | 702463 | 4 | 501739 | 4 | 702461 | 2 | 501741 | 0,8190 |
| miR-609  | 2 | 702463 | 4 | 501739 | 4 | 702461 | 2 | 501741 | 0,8190 |
| miR-610  | 2 | 702463 | 4 | 501739 | 4 | 702461 | 2 | 501741 | 0,8190 |
| miR-611  | 2 | 702463 | 4 | 501739 | 4 | 702461 | 2 | 501741 | 0,8190 |
| miR-612  | 2 | 702463 | 4 | 501739 | 4 | 702461 | 2 | 501741 | 0,8190 |



|            |   |        |   |        |   |        |   |        |        |
|------------|---|--------|---|--------|---|--------|---|--------|--------|
| miR-613    | 2 | 702463 | 4 | 501739 | 4 | 702461 | 2 | 501741 | 0,8190 |
| miR-614    | 2 | 702463 | 4 | 501739 | 4 | 702461 | 2 | 501741 | 0,8190 |
| miR-615-5p | 2 | 702463 | 4 | 501739 | 4 | 702461 | 2 | 501741 | 0,8190 |
| miR-617    | 2 | 702463 | 4 | 501739 | 4 | 702461 | 2 | 501741 | 0,8190 |
| miR-618    | 2 | 702463 | 4 | 501739 | 4 | 702461 | 2 | 501741 | 0,8190 |
| miR-619    | 2 | 702463 | 4 | 501739 | 4 | 702461 | 2 | 501741 | 0,8190 |
| miR-620    | 2 | 702463 | 4 | 501739 | 4 | 702461 | 2 | 501741 | 0,8190 |
| miR-621    | 2 | 702463 | 4 | 501739 | 4 | 702461 | 2 | 501741 | 0,8190 |
| miR-622    | 2 | 702463 | 4 | 501739 | 4 | 702461 | 2 | 501741 | 0,8190 |
| miR-623    | 2 | 702463 | 4 | 501739 | 4 | 702461 | 2 | 501741 | 0,8190 |
| miR-626    | 2 | 702463 | 4 | 501739 | 4 | 702461 | 2 | 501741 | 0,8190 |
| miR-630    | 2 | 702463 | 4 | 501739 | 4 | 702461 | 2 | 501741 | 0,8190 |
| miR-631    | 2 | 702463 | 4 | 501739 | 4 | 702461 | 2 | 501741 | 0,8190 |
| miR-632    | 2 | 702463 | 4 | 501739 | 4 | 702461 | 2 | 501741 | 0,8190 |
| miR-633    | 2 | 702463 | 4 | 501739 | 4 | 702461 | 2 | 501741 | 0,8190 |
| miR-634    | 2 | 702463 | 4 | 501739 | 4 | 702461 | 2 | 501741 | 0,8190 |
| miR-635    | 2 | 702463 | 4 | 501739 | 4 | 702461 | 2 | 501741 | 0,8190 |
| miR-637    | 2 | 702463 | 4 | 501739 | 4 | 702461 | 2 | 501741 | 0,8190 |
| miR-638    | 2 | 702463 | 4 | 501739 | 4 | 702461 | 2 | 501741 | 0,8190 |
| miR-639    | 2 | 702463 | 4 | 501739 | 4 | 702461 | 2 | 501741 | 0,8190 |
| miR-640    | 2 | 702463 | 4 | 501739 | 4 | 702461 | 2 | 501741 | 0,8190 |
| miR-644    | 2 | 702463 | 4 | 501739 | 4 | 702461 | 2 | 501741 | 0,8190 |
| miR-645    | 2 | 702463 | 4 | 501739 | 4 | 702461 | 2 | 501741 | 0,8190 |
| miR-646    | 2 | 702463 | 4 | 501739 | 4 | 702461 | 2 | 501741 | 0,8190 |
| miR-647    | 2 | 702463 | 4 | 501739 | 4 | 702461 | 2 | 501741 | 0,8190 |
| miR-648    | 2 | 702463 | 4 | 501739 | 4 | 702461 | 2 | 501741 | 0,8190 |
| miR-649    | 2 | 702463 | 4 | 501739 | 4 | 702461 | 2 | 501741 | 0,8190 |
| miR-650    | 2 | 702463 | 4 | 501739 | 4 | 702461 | 2 | 501741 | 0,8190 |
| miR-653    | 2 | 702463 | 4 | 501739 | 4 | 702461 | 2 | 501741 | 0,8190 |
| miR-657    | 2 | 702463 | 4 | 501739 | 4 | 702461 | 2 | 501741 | 0,8190 |

|            |   |        |   |        |   |        |   |        |        |
|------------|---|--------|---|--------|---|--------|---|--------|--------|
| miR-658    | 2 | 702463 | 4 | 501739 | 4 | 702461 | 2 | 501741 | 0,8190 |
| miR-659    | 2 | 702463 | 4 | 501739 | 4 | 702461 | 2 | 501741 | 0,8190 |
| miR-661    | 2 | 702463 | 4 | 501739 | 4 | 702461 | 2 | 501741 | 0,8190 |
| miR-662    | 2 | 702463 | 4 | 501739 | 4 | 702461 | 2 | 501741 | 0,8190 |
| miR-663    | 2 | 702463 | 4 | 501739 | 4 | 702461 | 2 | 501741 | 0,8190 |
| miR-663b   | 2 | 702463 | 4 | 501739 | 4 | 702461 | 2 | 501741 | 0,8190 |
| miR-676*   | 2 | 702463 | 4 | 501739 | 4 | 702461 | 2 | 501741 | 0,8190 |
| miR-711    | 2 | 702463 | 4 | 501739 | 4 | 702461 | 2 | 501741 | 0,8190 |
| miR-718    | 2 | 702463 | 4 | 501739 | 4 | 702461 | 2 | 501741 | 0,8190 |
| miR-7-2*   | 2 | 702463 | 4 | 501739 | 4 | 702461 | 2 | 501741 | 0,8190 |
| miR-720    | 2 | 702463 | 4 | 501739 | 4 | 702461 | 2 | 501741 | 0,8190 |
| miR-759    | 2 | 702463 | 4 | 501739 | 4 | 702461 | 2 | 501741 | 0,8190 |
| miR-761    | 2 | 702463 | 4 | 501739 | 4 | 702461 | 2 | 501741 | 0,8190 |
| miR-762    | 2 | 702463 | 4 | 501739 | 4 | 702461 | 2 | 501741 | 0,8190 |
| miR-764    | 2 | 702463 | 4 | 501739 | 4 | 702461 | 2 | 501741 | 0,8190 |
| miR-802    | 2 | 702463 | 4 | 501739 | 4 | 702461 | 2 | 501741 | 0,8190 |
| miR-875-3p | 2 | 702463 | 4 | 501739 | 4 | 702461 | 2 | 501741 | 0,8190 |
| miR-885-3p | 2 | 702463 | 4 | 501739 | 4 | 702461 | 2 | 501741 | 0,8190 |
| miR-888*   | 2 | 702463 | 4 | 501739 | 4 | 702461 | 2 | 501741 | 0,8190 |
| miR-892a   | 2 | 702463 | 4 | 501739 | 4 | 702461 | 2 | 501741 | 0,8190 |
| miR-892b   | 2 | 702463 | 4 | 501739 | 4 | 702461 | 2 | 501741 | 0,8190 |
| miR-920    | 2 | 702463 | 4 | 501739 | 4 | 702461 | 2 | 501741 | 0,8190 |
| miR-921    | 2 | 702463 | 4 | 501739 | 4 | 702461 | 2 | 501741 | 0,8190 |
| miR-922    | 2 | 702463 | 4 | 501739 | 4 | 702461 | 2 | 501741 | 0,8190 |
| miR-924    | 2 | 702463 | 4 | 501739 | 4 | 702461 | 2 | 501741 | 0,8190 |
| miR-933    | 2 | 702463 | 4 | 501739 | 4 | 702461 | 2 | 501741 | 0,8190 |
| miR-934    | 2 | 702463 | 4 | 501739 | 4 | 702461 | 2 | 501741 | 0,8190 |
| miR-936    | 2 | 702463 | 4 | 501739 | 4 | 702461 | 2 | 501741 | 0,8190 |
| miR-937    | 2 | 702463 | 4 | 501739 | 4 | 702461 | 2 | 501741 | 0,8190 |
| miR-938    | 2 | 702463 | 4 | 501739 | 4 | 702461 | 2 | 501741 | 0,8190 |

|               |      |        |      |        |      |        |      |        |        |
|---------------|------|--------|------|--------|------|--------|------|--------|--------|
| miR-943       | 2    | 702463 | 4    | 501739 | 4    | 702461 | 2    | 501741 | 0,8190 |
| miR-887       | 17   | 702448 | 7    | 501736 | 14   | 702451 | 10   | 501733 | 0,8191 |
| miR-421       | 95   | 702370 | 55   | 501688 | 88   | 702377 | 62   | 501681 | 0,8191 |
| miR-212       | 10   | 702455 | 12   | 501731 | 13   | 702452 | 9    | 501734 | 0,8264 |
| miR-450b-3p   | 10   | 702455 | 12   | 501731 | 13   | 702452 | 9    | 501734 | 0,8264 |
| miR-34b       | 15   | 702450 | 6    | 501737 | 12   | 702453 | 9    | 501734 | 0,8299 |
| miR-769-5p    | 29   | 702436 | 14   | 501729 | 25   | 702440 | 18   | 501725 | 0,8324 |
| miR-27a*      | 9    | 702456 | 11   | 501732 | 12   | 702453 | 8    | 501735 | 0,8332 |
| miR-146b-3p   | 3    | 702462 | 5    | 501738 | 5    | 702460 | 3    | 501740 | 0,8392 |
| miR-16-1*     | 3    | 702462 | 5    | 501738 | 5    | 702460 | 3    | 501740 | 0,8392 |
| miR-219-5p    | 3    | 702462 | 5    | 501738 | 5    | 702460 | 3    | 501740 | 0,8392 |
| miR-3130-5p   | 3    | 702462 | 5    | 501738 | 5    | 702460 | 3    | 501740 | 0,8392 |
| miR-374c      | 3    | 702462 | 5    | 501738 | 5    | 702460 | 3    | 501740 | 0,8392 |
| miR-582-3p    | 3    | 702462 | 5    | 501738 | 5    | 702460 | 3    | 501740 | 0,8392 |
| miR-769-3p    | 3    | 702462 | 5    | 501738 | 5    | 702460 | 3    | 501740 | 0,8392 |
| miR-876-3p    | 3    | 702462 | 5    | 501738 | 5    | 702460 | 3    | 501740 | 0,8392 |
| miR-92a-2*    | 3    | 702462 | 5    | 501738 | 5    | 702460 | 3    | 501740 | 0,8392 |
| miR-105*      | 13   | 702452 | 5    | 501738 | 11   | 702454 | 7    | 501736 | 0,8392 |
| miR-215       | 22   | 702443 | 10   | 501733 | 19   | 702446 | 13   | 501730 | 0,8392 |
| hsa-let-7f-1* | 105  | 702360 | 62   | 501681 | 97   | 702368 | 70   | 501673 | 0,8413 |
| miR-19b-2*    | 4    | 702461 | 6    | 501737 | 6    | 702459 | 4    | 501739 | 0,8471 |
| miR-216a      | 4    | 702461 | 6    | 501737 | 6    | 702459 | 4    | 501739 | 0,8471 |
| miR-2278      | 4    | 702461 | 6    | 501737 | 6    | 702459 | 4    | 501739 | 0,8471 |
| miR-3611      | 6    | 702459 | 8    | 501735 | 8    | 702457 | 6    | 501737 | 0,8477 |
| miR-3615      | 6    | 702459 | 8    | 501735 | 8    | 702457 | 6    | 501737 | 0,8477 |
| miR-431       | 6    | 702459 | 8    | 501735 | 8    | 702457 | 6    | 501737 | 0,8477 |
| miR-592       | 6    | 702459 | 8    | 501735 | 8    | 702457 | 6    | 501737 | 0,8477 |
| miR-143*      | 17   | 702448 | 18   | 501725 | 20   | 702445 | 15   | 501728 | 0,8490 |
| miR-224       | 41   | 702424 | 38   | 501705 | 46   | 702419 | 33   | 501710 | 0,8535 |
| miR-376a      | 1798 | 700667 | 1231 | 500512 | 1767 | 700698 | 1262 | 500481 | 0,8591 |

|             |      |        |      |        |      |        |      |        |        |
|-------------|------|--------|------|--------|------|--------|------|--------|--------|
| miR-130a    | 3059 | 699406 | 2254 | 499489 | 3099 | 699366 | 2214 | 499529 | 0,8676 |
| miR-651     | 28   | 702437 | 27   | 501716 | 32   | 702433 | 23   | 501720 | 0,8702 |
| miR-656     | 39   | 702426 | 36   | 501707 | 44   | 702421 | 31   | 501712 | 0,8718 |
| miR-129-3p  | 26   | 702439 | 13   | 501730 | 23   | 702442 | 16   | 501727 | 0,8920 |
| miR-422a    | 12   | 702453 | 13   | 501730 | 15   | 702450 | 10   | 501733 | 0,8945 |
| miR-328     | 58   | 702407 | 33   | 501710 | 53   | 702412 | 38   | 501705 | 0,8954 |
| miR-149*    | 12   | 702453 | 5    | 501738 | 10   | 702455 | 7    | 501736 | 0,9021 |
| miR-26a-1*  | 10   | 702455 | 11   | 501732 | 12   | 702453 | 9    | 501734 | 0,9110 |
| hsa-let-7c* | 10   | 702455 | 4    | 501739 | 8    | 702457 | 6    | 501737 | 0,9117 |
| miR-3605-5p | 10   | 702455 | 4    | 501739 | 8    | 702457 | 6    | 501737 | 0,9117 |
| miR-3916    | 10   | 702455 | 4    | 501739 | 8    | 702457 | 6    | 501737 | 0,9117 |
| miR-670     | 10   | 702455 | 4    | 501739 | 8    | 702457 | 6    | 501737 | 0,9117 |
| miR-765     | 10   | 702455 | 4    | 501739 | 8    | 702457 | 6    | 501737 | 0,9117 |
| miR-34a*    | 35   | 702430 | 19   | 501724 | 32   | 702433 | 22   | 501721 | 0,9198 |
| miR-26a-2*  | 93   | 702372 | 77   | 501666 | 99   | 702366 | 71   | 501672 | 0,9215 |
| miR-628-3p  | 8    | 702457 | 9    | 501734 | 10   | 702455 | 7    | 501736 | 0,9261 |
| miR-320c    | 15   | 702450 | 15   | 501728 | 18   | 702447 | 12   | 501731 | 0,9306 |
| miR-301a    | 91   | 702374 | 75   | 501668 | 97   | 702368 | 69   | 501674 | 0,9325 |
| miR-10a*    | 7    | 702458 | 8    | 501735 | 9    | 702456 | 6    | 501737 | 0,9330 |
| miR-1255a   | 6    | 702459 | 7    | 501736 | 8    | 702457 | 5    | 501738 | 0,9393 |
| miR-181c*   | 6    | 702459 | 7    | 501736 | 8    | 702457 | 5    | 501738 | 0,9393 |
| miR-891a    | 6    | 702459 | 7    | 501736 | 8    | 702457 | 5    | 501738 | 0,9393 |
| miR-766     | 23   | 702442 | 12   | 501731 | 20   | 702445 | 15   | 501728 | 0,9405 |
| miR-380*    | 5    | 702460 | 6    | 501737 | 6    | 702459 | 5    | 501738 | 0,9449 |
| miR-488*    | 5    | 702460 | 6    | 501737 | 6    | 702459 | 5    | 501738 | 0,9449 |
| miR-28-3p   | 789  | 701676 | 537  | 501206 | 774  | 701691 | 552  | 501191 | 0,9456 |
| miR-433     | 80   | 702385 | 49   | 501694 | 75   | 702390 | 54   | 501689 | 0,9489 |
| miR-1250    | 4    | 702461 | 5    | 501738 | 5    | 702460 | 4    | 501739 | 0,9495 |
| miR-2116    | 4    | 702461 | 5    | 501738 | 5    | 702460 | 4    | 501739 | 0,9495 |
| miR-3179    | 4    | 702461 | 5    | 501738 | 5    | 702460 | 4    | 501739 | 0,9495 |

|              |    |        |    |        |    |        |    |        |        |
|--------------|----|--------|----|--------|----|--------|----|--------|--------|
| miR-3190     | 4  | 702461 | 5  | 501738 | 5  | 702460 | 4  | 501739 | 0,9495 |
| miR-3199     | 4  | 702461 | 5  | 501738 | 5  | 702460 | 4  | 501739 | 0,9495 |
| miR-3200-5p  | 4  | 702461 | 5  | 501738 | 5  | 702460 | 4  | 501739 | 0,9495 |
| miR-3622a-5p | 4  | 702461 | 5  | 501738 | 5  | 702460 | 4  | 501739 | 0,9495 |
| miR-548q     | 4  | 702461 | 5  | 501738 | 5  | 702460 | 4  | 501739 | 0,9495 |
| miR-616      | 4  | 702461 | 5  | 501738 | 5  | 702460 | 4  | 501739 | 0,9495 |
| miR-100*     | 11 | 702454 | 5  | 501738 | 9  | 702456 | 7  | 501736 | 0,9496 |
| miR-105      | 21 | 702444 | 11 | 501732 | 19 | 702446 | 13 | 501730 | 0,9513 |
| miR-1224-3p  | 3  | 702462 | 4  | 501739 | 4  | 702461 | 3  | 501740 | 0,9526 |
| miR-1254     | 3  | 702462 | 4  | 501739 | 4  | 702461 | 3  | 501740 | 0,9526 |
| miR-1262     | 3  | 702462 | 4  | 501739 | 4  | 702461 | 3  | 501740 | 0,9526 |
| miR-187*     | 3  | 702462 | 4  | 501739 | 4  | 702461 | 3  | 501740 | 0,9526 |
| miR-194*     | 3  | 702462 | 4  | 501739 | 4  | 702461 | 3  | 501740 | 0,9526 |
| miR-200b*    | 3  | 702462 | 4  | 501739 | 4  | 702461 | 3  | 501740 | 0,9526 |
| miR-222*     | 3  | 702462 | 4  | 501739 | 4  | 702461 | 3  | 501740 | 0,9526 |
| miR-2277-5p  | 3  | 702462 | 4  | 501739 | 4  | 702461 | 3  | 501740 | 0,9526 |
| miR-3118     | 3  | 702462 | 4  | 501739 | 4  | 702461 | 3  | 501740 | 0,9526 |
| miR-3125     | 3  | 702462 | 4  | 501739 | 4  | 702461 | 3  | 501740 | 0,9526 |
| miR-3163     | 3  | 702462 | 4  | 501739 | 4  | 702461 | 3  | 501740 | 0,9526 |
| miR-3177     | 3  | 702462 | 4  | 501739 | 4  | 702461 | 3  | 501740 | 0,9526 |
| miR-3616-3p  | 3  | 702462 | 4  | 501739 | 4  | 702461 | 3  | 501740 | 0,9526 |
| miR-3621     | 3  | 702462 | 4  | 501739 | 4  | 702461 | 3  | 501740 | 0,9526 |
| miR-3622a-3p | 3  | 702462 | 4  | 501739 | 4  | 702461 | 3  | 501740 | 0,9526 |
| miR-3663-3p  | 3  | 702462 | 4  | 501739 | 4  | 702461 | 3  | 501740 | 0,9526 |
| miR-3692*    | 3  | 702462 | 4  | 501739 | 4  | 702461 | 3  | 501740 | 0,9526 |
| miR-3936     | 3  | 702462 | 4  | 501739 | 4  | 702461 | 3  | 501740 | 0,9526 |
| miR-561      | 3  | 702462 | 4  | 501739 | 4  | 702461 | 3  | 501740 | 0,9526 |
| miR-496      | 43 | 702422 | 25 | 501718 | 40 | 702425 | 28 | 501715 | 0,9547 |
| miR-502-3p   | 69 | 702396 | 57 | 501686 | 74 | 702391 | 52 | 501691 | 0,9560 |
| miR-3151     | 9  | 702456 | 4  | 501739 | 8  | 702457 | 5  | 501738 | 0,9591 |

|               |      |        |      |        |      |        |      |        |        |
|---------------|------|--------|------|--------|------|--------|------|--------|--------|
| miR-873       | 9    | 702456 | 4    | 501739 | 8    | 702457 | 5    | 501738 | 0,9591 |
| miR-30c-1*    | 46   | 702419 | 39   | 501704 | 50   | 702415 | 35   | 501708 | 0,9606 |
| miR-3612      | 14   | 702451 | 7    | 501736 | 12   | 702453 | 9    | 501734 | 0,9631 |
| miR-1228*     | 10   | 702455 | 10   | 501733 | 12   | 702453 | 8    | 501735 | 0,9662 |
| miR-23b*      | 9    | 702456 | 9    | 501734 | 11   | 702454 | 7    | 501736 | 0,9721 |
| miR-1180      | 224  | 702241 | 172  | 501571 | 231  | 702234 | 165  | 501578 | 0,9725 |
| miR-361-5p    | 532  | 701933 | 362  | 501381 | 522  | 701943 | 372  | 501371 | 0,9728 |
| miR-545*      | 14   | 702451 | 13   | 501730 | 16   | 702449 | 11   | 501732 | 0,9767 |
| miR-3913      | 8    | 702457 | 8    | 501735 | 9    | 702456 | 7    | 501736 | 0,9775 |
| miR-511       | 8    | 702457 | 8    | 501735 | 9    | 702456 | 7    | 501736 | 0,9775 |
| miR-641       | 10   | 702455 | 5    | 501738 | 9    | 702456 | 6    | 501737 | 0,9801 |
| miR-181a*     | 47   | 702418 | 29   | 501714 | 44   | 702421 | 32   | 501711 | 0,9837 |
| miR-668       | 8    | 702457 | 4    | 501739 | 7    | 702458 | 5    | 501738 | 0,9869 |
| miR-195       | 3021 | 699444 | 2123 | 499620 | 3001 | 699464 | 2143 | 499600 | 0,9877 |
| miR-1271      | 21   | 702444 | 18   | 501725 | 23   | 702442 | 16   | 501727 | 0,9883 |
| miR-15a*      | 16   | 702449 | 14   | 501729 | 18   | 702447 | 12   | 501731 | 0,9892 |
| miR-3130-3p   | 16   | 702449 | 14   | 501729 | 18   | 702447 | 12   | 501731 | 0,9892 |
| hsa-let-7a-2* | 19   | 702446 | 11   | 501732 | 18   | 702447 | 12   | 501731 | 0,9893 |
| miR-489       | 5    | 702460 | 5    | 501738 | 6    | 702459 | 4    | 501739 | 0,9907 |
| miR-744*      | 5    | 702460 | 5    | 501738 | 6    | 702459 | 4    | 501739 | 0,9907 |
| miR-33a       | 43   | 702422 | 27   | 501716 | 41   | 702424 | 29   | 501714 | 0,9913 |
| miR-1197      | 15   | 702450 | 13   | 501730 | 16   | 702449 | 12   | 501731 | 0,9922 |
| miR-3184      | 10   | 702455 | 9    | 501734 | 11   | 702454 | 8    | 501735 | 0,9926 |
| miR-193a-5p   | 134  | 702331 | 102  | 501641 | 138  | 702327 | 98   | 501645 | 0,9936 |
| miR-940       | 36   | 702429 | 29   | 501714 | 38   | 702427 | 27   | 501716 | 0,9937 |
| miR-124*      | 4    | 702461 | 4    | 501739 | 5    | 702460 | 3    | 501740 | 0,9939 |
| miR-1243      | 4    | 702461 | 4    | 501739 | 5    | 702460 | 3    | 501740 | 0,9939 |
| miR-1253      | 4    | 702461 | 4    | 501739 | 5    | 702460 | 3    | 501740 | 0,9939 |
| miR-1258      | 4    | 702461 | 4    | 501739 | 5    | 702460 | 3    | 501740 | 0,9939 |
| miR-1273d     | 4    | 702461 | 4    | 501739 | 5    | 702460 | 3    | 501740 | 0,9939 |

|             |     |        |     |        |     |        |     |        |        |
|-------------|-----|--------|-----|--------|-----|--------|-----|--------|--------|
| miR-129*    | 4   | 702461 | 4   | 501739 | 5   | 702460 | 3   | 501740 | 0,9939 |
| miR-1295    | 4   | 702461 | 4   | 501739 | 5   | 702460 | 3   | 501740 | 0,9939 |
| miR-1914*   | 4   | 702461 | 4   | 501739 | 5   | 702460 | 3   | 501740 | 0,9939 |
| miR-211     | 4   | 702461 | 4   | 501739 | 5   | 702460 | 3   | 501740 | 0,9939 |
| miR-3160    | 4   | 702461 | 4   | 501739 | 5   | 702460 | 3   | 501740 | 0,9939 |
| miR-3175    | 4   | 702461 | 4   | 501739 | 5   | 702460 | 3   | 501740 | 0,9939 |
| miR-3607-5p | 4   | 702461 | 4   | 501739 | 5   | 702460 | 3   | 501740 | 0,9939 |
| miR-363*    | 4   | 702461 | 4   | 501739 | 5   | 702460 | 3   | 501740 | 0,9939 |
| miR-466     | 4   | 702461 | 4   | 501739 | 5   | 702460 | 3   | 501740 | 0,9939 |
| miR-548k    | 4   | 702461 | 4   | 501739 | 5   | 702460 | 3   | 501740 | 0,9939 |
| miR-551b    | 4   | 702461 | 4   | 501739 | 5   | 702460 | 3   | 501740 | 0,9939 |
| miR-570     | 4   | 702461 | 4   | 501739 | 5   | 702460 | 3   | 501740 | 0,9939 |
| miR-636     | 4   | 702461 | 4   | 501739 | 5   | 702460 | 3   | 501740 | 0,9939 |
| miR-770-5p  | 4   | 702461 | 4   | 501739 | 5   | 702460 | 3   | 501740 | 0,9939 |
| miR-888     | 4   | 702461 | 4   | 501739 | 5   | 702460 | 3   | 501740 | 0,9939 |
| miR-186*    | 9   | 702456 | 5   | 501738 | 8   | 702457 | 6   | 501737 | 0,9951 |
| miR-3154    | 9   | 702456 | 5   | 501738 | 8   | 702457 | 6   | 501737 | 0,9951 |
| miR-548w    | 9   | 702456 | 8   | 501735 | 10  | 702455 | 7   | 501736 | 0,9952 |
| miR-188-5p  | 43  | 702422 | 34  | 501709 | 45  | 702420 | 32  | 501711 | 0,9955 |
| miR-381     | 297 | 702168 | 204 | 501539 | 292 | 702173 | 209 | 501534 | 0,9960 |
| miR-584     | 12  | 702453 | 7   | 501736 | 11  | 702454 | 8   | 501735 | 0,9961 |
| miR-2355-3p | 18  | 702447 | 11  | 501732 | 17  | 702448 | 12  | 501731 | 0,9967 |
| miR-1248    | 8   | 702457 | 7   | 501736 | 9   | 702456 | 6   | 501737 | 0,9972 |
| miR-203     | 12  | 702453 | 10  | 501733 | 13  | 702452 | 9   | 501734 | 0,9980 |
| miR-676     | 7   | 702458 | 4   | 501739 | 6   | 702459 | 5   | 501738 | 0,9981 |
| miR-758     | 161 | 702304 | 120 | 501623 | 164 | 702301 | 117 | 501626 | 0,9981 |
| miR-589*    | 10  | 702455 | 6   | 501737 | 9   | 702456 | 7   | 501736 | 0,9984 |
| miR-1285    | 19  | 702446 | 12  | 501731 | 18  | 702447 | 13  | 501730 | 0,9985 |
| miR-500a*   | 43  | 702422 | 33  | 501710 | 44  | 702421 | 32  | 501711 | 0,9989 |
| miR-99b*    | 45  | 702420 | 30  | 501713 | 44  | 702421 | 31  | 501712 | 0,9991 |

|               |     |        |     |        |     |        |     |        |        |
|---------------|-----|--------|-----|--------|-----|--------|-----|--------|--------|
| hsa-let-7f-2* | 19  | 702446 | 15  | 501728 | 20  | 702445 | 14  | 501729 | 0,9991 |
| miR-767-5p    | 19  | 702446 | 15  | 501728 | 20  | 702445 | 14  | 501729 | 0,9991 |
| miR-545       | 17  | 702448 | 11  | 501732 | 16  | 702449 | 12  | 501731 | 0,9995 |
| miR-3679-5p   | 6   | 702459 | 5   | 501738 | 6   | 702459 | 5   | 501738 | 0,9995 |
| miR-431*      | 6   | 702459 | 5   | 501738 | 6   | 702459 | 5   | 501738 | 0,9995 |
| miR-890       | 6   | 702459 | 5   | 501738 | 6   | 702459 | 5   | 501738 | 0,9995 |
| miR-337-5p    | 18  | 702447 | 14  | 501729 | 19  | 702446 | 13  | 501730 | 0,9996 |
| miR-708*      | 10  | 702455 | 8   | 501735 | 11  | 702454 | 7   | 501736 | 0,9996 |
| miR-944       | 11  | 702454 | 7   | 501736 | 11  | 702454 | 7   | 501736 | 0,9996 |
| miR-483-3p    | 43  | 702422 | 29  | 501714 | 42  | 702423 | 30  | 501713 | 0,9996 |
| miR-1299      | 8   | 702457 | 5   | 501738 | 8   | 702457 | 5   | 501738 | 0,9996 |
| miR-150*      | 8   | 702457 | 5   | 501738 | 8   | 702457 | 5   | 501738 | 0,9996 |
| miR-206       | 8   | 702457 | 5   | 501738 | 8   | 702457 | 5   | 501738 | 0,9996 |
| miR-432*      | 8   | 702457 | 5   | 501738 | 8   | 702457 | 5   | 501738 | 0,9996 |
| miR-132*      | 90  | 702375 | 62  | 501681 | 89  | 702376 | 63  | 501680 | 0,9997 |
| miR-574-3p    | 969 | 701496 | 698 | 501045 | 972 | 701493 | 695 | 501048 | 0,9999 |
| miR-1266      | 5   | 702460 | 4   | 501739 | 5   | 702460 | 4   | 501739 | 0,9999 |
| miR-1267      | 5   | 702460 | 4   | 501739 | 5   | 702460 | 4   | 501739 | 0,9999 |
| miR-3605-3p   | 5   | 702460 | 4   | 501739 | 5   | 702460 | 4   | 501739 | 0,9999 |
| miR-3661      | 5   | 702460 | 4   | 501739 | 5   | 702460 | 4   | 501739 | 0,9999 |
| miR-939       | 5   | 702460 | 4   | 501739 | 5   | 702460 | 4   | 501739 | 0,9999 |
| miR-500a      | 38  | 702427 | 26  | 501717 | 37  | 702428 | 27  | 501716 | 0,9999 |
| miR-331-5p    | 22  | 702443 | 15  | 501728 | 22  | 702443 | 15  | 501728 | 1,0000 |
| miR-541*      | 6   | 702459 | 4   | 501739 | 6   | 702459 | 4   | 501739 | 1,0000 |
| miR-654-5p    | 6   | 702459 | 4   | 501739 | 6   | 702459 | 4   | 501739 | 1,0000 |
| miR-330-3p    | 16  | 702449 | 11  | 501732 | 16  | 702449 | 11  | 501732 | 1,0000 |
| miR-671-3p    | 8   | 702457 | 6   | 501737 | 8   | 702457 | 6   | 501737 | 1,0000 |
| miR-103-2*    | 15  | 702450 | 11  | 501732 | 15  | 702450 | 11  | 501732 | 1,0000 |
| miR-877       | 37  | 702428 | 26  | 501717 | 37  | 702428 | 26  | 501717 | 1,0000 |
| miR-136*      | 193 | 702272 | 137 | 501606 | 193 | 702272 | 137 | 501606 | 1,0000 |



|             |     |        |     |        |     |        |     |        |        |
|-------------|-----|--------|-----|--------|-----|--------|-----|--------|--------|
| miR-29a*    | 283 | 702182 | 203 | 501540 | 284 | 702181 | 202 | 501541 | 1,0000 |
| miR-452     | 11  | 702454 | 8   | 501735 | 11  | 702454 | 8   | 501735 | 1,0000 |
| miR-1294    | 7   | 702458 | 5   | 501738 | 7   | 702458 | 5   | 501738 | 1,0000 |
| miR-3065-5p | 7   | 702458 | 5   | 501738 | 7   | 702458 | 5   | 501738 | 1,0000 |

---

# P-values were calculated using  $\chi^2$  test; P<0.0001 is considered as significant

**Supplementary Table 3.** Sequencing-based SAM results for differentially expressed miRNAs between TGCTs and NT

| <b>miRNA</b>                           | <b>Score<br/>(d)</b> | <b>Fold change<br/>(log2)</b> | <b>FDR<br/>(q-value)</b> |
|----------------------------------------|----------------------|-------------------------------|--------------------------|
| <b>Over-expressed miRNAs in TGCTs</b>  |                      |                               |                          |
| miR-223                                | 1,2                  | 2,0                           | 72,4                     |
| miR-15a                                | 1,2                  | 1,8                           | 72,4                     |
| miR-21                                 | 1,1                  | 2,1                           | 72,8                     |
| miR-92a                                | 1,0                  | 1,8                           | 75,0                     |
| miR-15b                                | 0,9                  | 1,7                           | 75,0                     |
| miR-27a                                | 0,9                  | 1,8                           | 75,0                     |
| miR-142-3p                             | 0,9                  | 2,2                           | 77,7                     |
| miR-19b                                | 0,9                  | 1,7                           | 77,7                     |
| miR-25                                 | 0,9                  | 1,8                           | 77,7                     |
| miR-96                                 | 0,9                  | 2,0                           | 77,7                     |
| miR-374a                               | 0,8                  | 1,9                           | 82,3                     |
| miR-302b*                              | 0,8                  | 1,9                           | 82,3                     |
| miR-372                                | 0,8                  | 2,0                           | 82,3                     |
| miR-302b                               | 0,8                  | 2,2                           | 82,3                     |
| miR-183                                | 0,8                  | 1,7                           | 82,3                     |
| miR-367                                | 0,8                  | 2,1                           | 82,3                     |
| miR-142-5p                             | 0,8                  | 2,0                           | 82,3                     |
| miR-182                                | 0,8                  | 2,1                           | 82,3                     |
| miR-515-5p                             | 0,8                  | 2,0                           | 82,3                     |
| miR-19a                                | 0,8                  | 1,9                           | 82,3                     |
| miR-7                                  | 0,7                  | 1,8                           | 82,5                     |
| miR-16                                 | 0,7                  | 1,6                           | 82,5                     |
| miR-302a                               | 0,7                  | 2,2                           | 83,3                     |
| <b>Under-expressed miRNAs in TGCTs</b> |                      |                               |                          |
| miR-202                                | -8,3                 | 0,0                           | 0,0                      |
| miR-507                                | -6,3                 | 0,1                           | 0,0                      |
| miR-510                                | -5,3                 | 0,0                           | 0,0                      |
| miR-513c                               | -4,1                 | 0,1                           | 0,0                      |
| miR-514                                | -4,1                 | 0,0                           | 0,0                      |
| miR-424*                               | -3,9                 | 0,1                           | 0,0                      |
| miR-508-5p                             | -3,8                 | 0,1                           | 0,0                      |
| miR-513b                               | -2,7                 | 0,0                           | 0,0                      |
| miR-542-5p                             | -2,5                 | 0,2                           | 0,0                      |
| miR-508-3p                             | -2,5                 | 0,0                           | 0,0                      |
| miR-202*                               | -2,5                 | 0,1                           | 0,0                      |
| miR-134                                | -2,5                 | 0,2                           | 0,0                      |
| miR-503                                | -2,5                 | 0,2                           | 0,0                      |
| miR-509-3p                             | -2,4                 | 0,1                           | 0,0                      |
| miR-424                                | -2,3                 | 0,2                           | 6,2                      |
| miR-506                                | -2,0                 | 0,2                           | 18,7                     |
| miR-129-5p                             | -1,9                 | 0,1                           | 18,7                     |
| miR-193b*                              | -1,9                 | 0,2                           | 18,7                     |
| miR-204                                | -1,9                 | 0,2                           | 18,7                     |
| miR-483-5p                             | -1,9                 | 0,3                           | 18,7                     |

|              |      |     |      |
|--------------|------|-----|------|
| miR-99a*     | -1,7 | 0,2 | 26,7 |
| miR-509-3-5p | -1,6 | 0,3 | 32,5 |
| hsa-let-7b   | -1,6 | 0,2 | 32,5 |
| miR-494      | -1,5 | 0,4 | 36,0 |
| hsa-let-7c   | -1,5 | 0,2 | 36,0 |
| miR-513a-3p  | -1,5 | 0,3 | 36,0 |
| miR-10b*     | -1,4 | 0,3 | 41,6 |
| miR-324-5p   | -1,3 | 0,5 | 50,1 |
| miR-23a*     | -1,3 | 0,3 | 50,1 |
| miR-25*      | -1,3 | 0,5 | 50,1 |
| miR-29b-2*   | -1,2 | 0,4 | 50,1 |
| miR-542-3p   | -1,2 | 0,5 | 50,1 |
| miR-485-5p   | -1,2 | 0,4 | 50,1 |
| miR-210      | -1,2 | 0,4 | 50,1 |
| miR-411      | -1,2 | 0,5 | 50,1 |
| miR-487b     | -1,1 | 0,5 | 50,1 |
| miR-2110     | -1,1 | 0,3 | 50,1 |
| miR-874      | -1,1 | 0,4 | 56,1 |
| miR-320a     | -1,0 | 0,4 | 56,1 |
| miR-214      | -1,0 | 0,4 | 56,1 |
| miR-140-3p   | -1,0 | 0,5 | 56,1 |
| miR-99a      | -1,0 | 0,4 | 56,1 |
| miR-151-3p   | -1,0 | 0,5 | 56,1 |
| miR-509-5p   | -1,0 | 0,4 | 56,1 |
| miR-664*     | -1,0 | 0,4 | 56,1 |
| miR-423-5p   | -1,0 | 0,5 | 56,1 |
| miR-1908     | -0,9 | 0,4 | 56,1 |
| miR-362-5p   | -0,9 | 0,4 | 56,1 |
| miR-127-3p   | -0,9 | 0,6 | 56,1 |
| miR-449a     | -0,9 | 0,4 | 56,1 |
| miR-514b-5p  | -0,9 | 0,4 | 56,1 |
| miR-409-3p   | -0,9 | 0,6 | 56,1 |
| miR-574-5p   | -0,8 | 0,6 | 56,1 |
| miR-744      | -0,8 | 0,6 | 56,1 |
| miR-199a-5p  | -0,8 | 0,6 | 56,1 |
| miR-450a     | -0,8 | 0,6 | 56,1 |
| miR-193b     | -0,8 | 0,6 | 56,1 |
| miR-370      | -0,8 | 0,5 | 56,1 |
| miR-125a-3p  | -0,7 | 0,5 | 61,9 |
| miR-221      | -0,7 | 0,7 | 61,9 |
| miR-299-3p   | -0,7 | 0,6 | 61,9 |
| miR-133a     | -0,7 | 0,5 | 61,9 |
| miR-1296     | -0,6 | 0,5 | 61,9 |
| miR-642a     | -0,6 | 0,5 | 61,9 |
| miR-525-3p   | -0,6 | 0,6 | 61,9 |
| miR-517b     | -0,6 | 0,6 | 61,9 |
| miR-200a     | -0,6 | 0,6 | 61,9 |
| miR-520d-5p  | -0,6 | 0,6 | 61,9 |
| miR-197      | -0,5 | 0,7 | 64,9 |
| miR-520e     | -0,5 | 0,6 | 64,9 |
| hsa-let-7a   | -0,5 | 0,6 | 64,9 |
| miR-127-5p   | -0,5 | 0,7 | 64,9 |

|             |      |     |      |
|-------------|------|-----|------|
| miR-181b    | -0,5 | 0,7 | 64,9 |
| miR-642b    | -0,5 | 0,6 | 64,9 |
| miR-362-3p  | -0,5 | 0,7 | 64,9 |
| miR-521     | -0,5 | 0,6 | 64,9 |
| miR-375     | -0,5 | 0,6 | 64,9 |
| miR-1301    | -0,5 | 0,7 | 64,9 |
| miR-345     | -0,5 | 0,7 | 64,9 |
| miR-373*    | -0,5 | 0,7 | 64,9 |
| miR-522     | -0,4 | 0,7 | 64,9 |
| miR-339-5p  | -0,4 | 0,7 | 64,9 |
| miR-497     | -0,4 | 0,7 | 64,9 |
| hsa-let-7e  | -0,4 | 0,7 | 64,9 |
| miR-302c*   | -0,4 | 0,7 | 64,9 |
| miR-518d-3p | -0,4 | 0,7 | 68,5 |
| miR-660     | -0,4 | 0,8 | 68,5 |
| miR-125b    | -0,4 | 0,7 | 68,5 |
| miR-135a    | -0,3 | 0,7 | 68,5 |
| miR-26b*    | -0,3 | 0,8 | 70,9 |
| miR-28-5p   | -0,3 | 0,8 | 70,9 |
| miR-615-3p  | -0,3 | 0,7 | 70,9 |
| miR-152     | -0,3 | 0,8 | 70,9 |
| miR-130b*   | -0,3 | 0,8 | 70,9 |
| miR-92a-1*  | -0,3 | 0,8 | 70,9 |
| miR-382     | -0,3 | 0,8 | 70,9 |
| miR-488     | -0,3 | 0,8 | 70,9 |
| miR-125a-5p | -0,3 | 0,8 | 70,9 |
| miR-1269    | -0,2 | 0,8 | 70,9 |
| miR-520g    | -0,2 | 0,8 | 72,4 |
| miR-30b*    | -0,2 | 0,8 | 72,4 |
| miR-411*    | -0,2 | 0,9 | 72,4 |
| miR-548x    | -0,2 | 0,8 | 72,4 |
| miR-523     | -0,2 | 0,9 | 72,4 |
| miR-520a-3p | -0,2 | 0,9 | 72,4 |

---

FDR = False discovery rate

**Supplementary Table 4.** Results from immunohistochemical analysis of p50 and PEG3 in TGCTs, non-germ cell testicular tumors, and testicular non-tumor tissues

| Immunohistochemical marker<br>Sample type    | (n =)     | Immunohistochemistry [Number (%)] |                  |                  |                  |
|----------------------------------------------|-----------|-----------------------------------|------------------|------------------|------------------|
|                                              |           | Negative                          | Weak             | Intermediate     | Strong           |
| <b>p50 staining</b>                          |           |                                   |                  |                  |                  |
| <b>TGCTs</b>                                 | <b>96</b> | <b>2 (2.1)</b>                    | <b>11 (11.5)</b> | <b>8 (8.3)</b>   | <b>75 (78.1)</b> |
| Seminoma (classic, multinodular, anaplastic) | 66        | 2 (3.0)                           | 7 (10.6)         | 7 (10.6)         | 50 (75.8)        |
| Embryonal carcinoma                          | 17        | 0                                 | 2 (11.8)         | 1 (5.9)          | 14 (82.4)        |
| Yolk sac tumor                               | 7         | 0                                 | 0                | 0                | 7 (100)          |
| Mixed germ cell tumor                        | 1         | 0                                 | 0                | 0                | 1 (100)          |
| Teratoma                                     | 2         | 0                                 | 1 (50)           | 0                | 1 (50)           |
| Choriocarcinoma                              | 1         | 0                                 | 0                | 0                | 1 (100)          |
| IGCNU                                        | 2         | 0                                 | 1 (50)           | 0                | 1 (50)           |
| <b>Non-germ cell testicular tumors</b>       | <b>8</b>  | <b>0</b>                          | <b>4 (50)</b>    | <b>0</b>         | <b>4 (50)</b>    |
| Testis adenomatoid tumor                     | 1         | 0                                 | 0                | 0                | 1 (100)          |
| Testis fibrous pseudotumor                   | 1         | 0                                 | 0                | 0                | 1 (100)          |
| Leydig cell tumor                            | 1         | 0                                 | 0                | 0                | 1 (100)          |
| Testis liposarcoma                           | 3         | 0                                 | 3 (100)          | 0                | 0                |
| Testis papillary serous                      | 1         | 0                                 | 1 (100)          | 0                | 0                |
| Testis adenocarcinoma                        | 1         | 0                                 | 0                | 0                | 1 (100)          |
| <b>Testicular non-tumor tissues</b>          | <b>25</b> | <b>1 (4)</b>                      | <b>8 (32)</b>    | <b>3 (12)</b>    | <b>13 (52)</b>   |
| <b>PEG3 staining</b>                         |           |                                   |                  |                  |                  |
| <b>TGCTs</b>                                 | <b>96</b> | <b>4 (4.2)</b>                    | <b>2 (2.1)</b>   | <b>10 (10.4)</b> | <b>80 (83.3)</b> |
| Seminoma (classic, multinodular, anaplastic) | 63        | 3 (4.8)                           | 2 (3.2)          | 8 (12.7)         | 50 (79.4)        |
| Embryonal carcinoma                          | 18        | 0                                 | 0                | 0                | 18 (100)         |
| Yolk sac tumor                               | 7         | 0                                 | 0                | 2 (28.6)         | 5 (71.4)         |
| Mixed germ cell tumor                        | 1         | 0                                 | 0                | 0                | 1 (100)          |
| Teratoma                                     | 4         | 1 (25)                            | 0                | 0                | 3 (75)           |
| Choriocarcinoma                              | 1         | 0                                 | 0                | 0                | 1 (100)          |
| IGCNU                                        | 2         | 0                                 | 0                | 0                | 2 (100)          |
| <b>Non-germ cell testicular tumors</b>       | <b>8</b>  | <b>0</b>                          | <b>5 (62.5)</b>  | <b>0</b>         | <b>3 (37.5)</b>  |
| Testis adenomatoid tumor                     | 1         | 0                                 | 1 (100)          | 0                | 0                |
| Testis fibrous pseudotumor                   | 1         | 0                                 | 1 (100)          | 0                | 0                |
| Leydig cell tumor                            | 1         | 0                                 | 0                | 0                | 1 (100)          |
| Testis liposarcoma                           | 3         | 0                                 | 2 (66.7)         | 0                | 1 (33.3)         |
| Testis papillary serous                      | 1         | 0                                 | 1 (100)          | 0                | 0                |
| Testis adenocarcinoma                        | 1         | 0                                 | 0                | 0                | 1 (100)          |
| <b>Testicular non-tumor tissues</b>          | <b>25</b> | <b>0</b>                          | <b>12 (48)</b>   | <b>3 (12)</b>    | <b>10 (40)</b>   |

IGCNU = intratubular germ cell neoplasia unclassified

Negative = All nuclei scored as having intensity 0

Weak = A mixture of nuclei scored as having intensity 0 and 1+, 2+ or 3+

Intermediate = All nuclei scored as intensity 1+ or a mixture of nuclei scored as 1+ and 2+ or 3+

Strong = A mixture of nuclei scored as having intensity 2+, 3+ or a mixture of nuclei with 2+ and 3+

**Supplementary Table 5.** Genotypes of the 2102Ep and TCam-2 cell lines  
for short tandem repeat (STR) markers

| <b>Locus</b>   | <b>2102Ep</b>      |                   | <b>TCam-2</b>         |                   |                       |
|----------------|--------------------|-------------------|-----------------------|-------------------|-----------------------|
|                | <b>Publication</b> | <b>This study</b> | <b>Reference (17)</b> | <b>This study</b> | <b>Reference (17)</b> |
| <i>AMEL</i>    |                    | X, Y              | X, Y                  | X, Y              | X, Y                  |
| <i>D8S1179</i> |                    | 14, 15            | -                     | 14, 17            | -                     |
| <i>D21S11</i>  |                    | 28, 29            | -                     | 30                | -                     |
| <i>D7S820</i>  |                    | 7                 | 7, 13                 | 8, 11             | 8, 11                 |
| <i>CSF1PO</i>  |                    | 11, 12            | 11, 12                | 9, 11             | 9, 11                 |
| <i>D3S1358</i> |                    | 16                | -                     | 16, 17            | -                     |
| <i>TH01</i>    |                    | 9, 9.3            | 9, 9.3                | 6, 9              | 6, 9                  |
| <i>D13S317</i> |                    | 8                 | 8                     | 8, 12             | 8, 12                 |
| <i>D16S539</i> |                    | 11, 12            | 11, 12                | 9                 | 9                     |
| <i>D2S1338</i> |                    | 17, 20            | -                     | 23                | -                     |
| <i>D19S433</i> |                    | 13, 14            | -                     | 15                | -                     |
| <i>vWA</i>     |                    | 16, 17, 18        | 13, 16, 18            | 18, 19            | 18, 19                |
| <i>TPOX</i>    |                    | 8, 11             | 8, 11                 | 9                 | 9                     |
| <i>D18S51</i>  |                    | 15                | -                     | 13                | -                     |
| <i>D5S818</i>  |                    | 11                | 11                    | 11, 12            | 11, 12                |
| <i>FGA</i>     |                    | 22                | -                     | 25                | -                     |

Reference (17) Palmer *et al.* 2010.

**Supplementary Table 6.** List of the oligonucleotides used in the study

| <b>Purpose, Name</b>                             | <b>Oligonucleotide Sequences (5' to 3')</b>                                                                  |
|--------------------------------------------------|--------------------------------------------------------------------------------------------------------------|
| <b>Small RNA cloning</b>                         |                                                                                                              |
| 3'-adaptor ("Linker-1"; IDT)                     | /5rApp/CTGTAGGCACCATCAAT/3ddC                                                                                |
| 5'-adaptor                                       | ACGCTCTTCCGATCTv                                                                                             |
| RT                                               | ATTGATGGTGCCTACAG                                                                                            |
| Amp_F                                            | GATACGGCGACCACCGAGATCTACACTCTTCCCTACACGACGCTCTTCCGATCT                                                       |
| Amp_R                                            | CAAGCAGAAGACGGCATAACGAGCTCTTCCGATCTATTGATGGTGCCTACAG                                                         |
| <b>PEG3 3'UTR luciferase reporter constructs</b> |                                                                                                              |
| WT_sense                                         | TTTATGATTATAACTGTGTCAAAtagtATTCTATCTGTAATAGTGTCAACtagtTAGGGCTTGGAAGTATG<br>TCAAAGtagtTCAAAGATGCAGGGAGTGTCAA  |
| WT_antisense                                     | TTTGACACTCCCTGCATCTTTGAactaCTTTGACATACTTCCAAGCCCTAactaGTTGACACTATTACAG<br>ATAGAATactaTTTGACACAGTTATAATCATAAA |
| MUT_sense                                        | TTTATGATTATAACTGTGCGAAAtagtATTCTATCTGTAATAGTGTTACtagtTAGGGCTTGGAAGTATTGA<br>AAGtagtTCAAAGATGCAGGGAGTGTGCGAA  |
| MUT_antisense                                    | TTCGCACTCCCTGCATCTTTGAactaCTTTCAATACTTCCAAGCCCTAactaGTAACACTATTACAGATA<br>GAATactaTTCGCACAGTTATAATCATAAA     |
| <b>shRNA constructs</b>                          |                                                                                                              |
| shPEG3-1_sense                                   | GATCTGCCTAATCTATGTGGAATTTGTCGAAAAATTCCACATAGATTAGGTTTTTTTTGGTAC                                              |
| shPEG3-1_antisense                               | CAAAAAACCTAATCTATGTGGAATTTTTTCGACAAATTCCACATAGATTAGGCA                                                       |
| shPEG3-2_sense                                   | GATCTGGCTCTAACCCCTATGAAAACCCGAATTTTCATAGGGGTTAGAGCTATTTTTGGTAC                                               |
| shPEG3-2_antisense                               | CAAAAATAGCTCTAACCCCTATGAAAATTCGGGTTTTTCATAGGGGTTAGAGCCA                                                      |
| <b>PEG3 CDS construct</b>                        |                                                                                                              |
| PEG3-F                                           | ATGCTGCCTCCAAAGCACTTGTC                                                                                      |
| PEG3-R                                           | TCAGCCAGTGTGGGTATTCTGGT                                                                                      |
| <b>PEG3 Pyrosequencing*</b>                      |                                                                                                              |
| PEG-SF                                           | TGTCTTCTAGGCTGCTTGGTTCGTGCC                                                                                  |
| PEG3-F                                           | CTCACAACACAATCCAGGAC                                                                                         |
| PEG3-R                                           | TAGACCTCGACTGGTGCTTG                                                                                         |

v = barcodes with triple RNA molecules: aaa, ggg, ccc or uuu; \* Primers were used in Ref. 40
